# Supplementary material for: Synthesis and Properties of (1R(S),5R(S),7R(S),8R(S))-1,8-Bis(hydroxymethyl)-6-azadispiro[4.1.4.2]tridecane-6-oxyl: Reduction-Resistant Spin Labels with High Spin Relaxation Times
Source: MDPI journal article supplement (doi:10.3390/ijms241411498), 2023-07-15
Supplement: s1 [file s1]

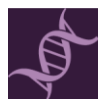

## 1. Table of Contents.

|                                                                                                                                                                                                                                                                                                                 |    |
|-----------------------------------------------------------------------------------------------------------------------------------------------------------------------------------------------------------------------------------------------------------------------------------------------------------------|----|
| 1. Table of Contents.....                                                                                                                                                                                                                                                                                       | 1  |
| 2. IR spectral data.....                                                                                                                                                                                                                                                                                        | 5  |
| Fig. S1. IR spectrum of (1 <i>R</i> ( <i>S</i> ),5 <i>R</i> ( <i>S</i> ),7 <i>R</i> ( <i>S</i> ),8 <i>R</i> ( <i>S</i> ))-1,8-Bis(hydroxymethyl)-6-azadispiro[4.1.4.2]tridecane 6-oxyl (5) (KBr).....                                                                                                           | 5  |
| Fig. S2. IR spectrum of [(5 <i>R</i> ( <i>S</i> ),6 <i>R</i> ( <i>S</i> ))-1-Oxido-1-azaspiro[4.4]non-1-en-6-yl]methanol (9) (KBr).....                                                                                                                                                                         | 5  |
| Fig. S3. IR spectrum of [(5 <i>R</i> ( <i>S</i> ),6 <i>R</i> ( <i>S</i> ))-1-Oxido-2-pent-4-en-1-yl-1-azaspiro[4.4]non-1-en-6-yl]methanol (12) (neat).....                                                                                                                                                      | 6  |
| Fig. S4. IR spectrum of (1 <i>R</i> ( <i>S</i> ),2 <i>R</i> ( <i>S</i> ),6 <i>a'</i> <i>R</i> ( <i>S</i> ),9 <i>a'</i> <i>R</i> ( <i>S</i> ))-Hexahydro-6' <i>H</i> -spiro[cyclopentan-1,3'-cyclopenta[ <i>c</i> ]pyrrolo[1,2- <i>b</i> ]isoxazol]-2-ylmethanol (13) (neat).....                                | 6  |
| Fig. S5. IR spectrum of (1 <i>R</i> ( <i>S</i> ),5 <i>R</i> ( <i>S</i> ),7 <i>R</i> ( <i>S</i> ),8 <i>R</i> ( <i>S</i> ))-6-azadispiro[4.1.4.2]tridecan-1,8-diylldimethanol (14) (KBr).....                                                                                                                     | 7  |
| Fig. S6. IR spectrum of (1 <i>R</i> ( <i>S</i> ),5 <i>R</i> ( <i>S</i> ),7 <i>R</i> ( <i>S</i> ),8 <i>R</i> ( <i>S</i> ))-6-azadispiro[4.1.4.2]tridecan-1,8-diylldi(methylene)diacetate (16) (neat).....                                                                                                        | 7  |
| Fig. S7. IR spectrum of 1 <i>R</i> ( <i>S</i> ),5 <i>R</i> ( <i>S</i> ),7 <i>R</i> ( <i>S</i> ),8 <i>R</i> ( <i>S</i> ))-1,8-Bis[(acetyloxy)methyl]-6-azadispiro[4.1.4.2]tridecane-6-oxyl (17) (KBr).....                                                                                                       | 8  |
| Fig. S8. IR spectrum of (4 <i>R</i> ( <i>S</i> ),5 <i>S</i> ( <i>R</i> ),7 <i>R</i> ( <i>S</i> ),8 <i>R</i> ( <i>S</i> ))-4,8-Bis[(acetyloxy)methyl]-6-azadispiro[4.1.4.2]tridec-1-ene-6-oxyl (18) (neat).....                                                                                                  | 8  |
| Fig. S9. IR spectrum of. (1 <i>R</i> ( <i>S</i> ),5 <i>R</i> ( <i>S</i> ),7 <i>R</i> ( <i>S</i> ),8 <i>R</i> ( <i>S</i> ))-6-Azadispiro[4.1.4.2]tridecan-1,8-dicarboxylic acid 20 (KBr).....                                                                                                                    | 9  |
| Fig. S10. IR spectrum of Dimethyl (1 <i>R</i> ( <i>S</i> ),5 <i>R</i> ( <i>S</i> ),7 <i>R</i> ( <i>S</i> ),8 <i>R</i> ( <i>S</i> ))-6-azadispiro[4.1.4.2]tridecan-1,8-dicarboxylate (21) (neat).....                                                                                                            | 9  |
| Fig. S11. IR spectrum of (1 <i>R</i> ( <i>S</i> ),5 <i>R</i> ( <i>S</i> ),7 <i>R</i> ( <i>S</i> ),8 <i>R</i> ( <i>S</i> ))-1,8-Bis(methoxycarbonyl)-6-azadispiro[4.1.4.2]tridecane-6-oxyl (22) (KBr).....                                                                                                       | 10 |
| Fig. S12. IR spectrum of 1 <i>R</i> ( <i>S</i> ),5 <i>R</i> ( <i>S</i> ),7 <i>R</i> ( <i>S</i> ),8 <i>R</i> ( <i>S</i> ))-1,8-Dicarboxy-6-azadispiro[4.1.4.2]tridecane-6-oxyl (23a) (KBr).....                                                                                                                  | 10 |
| Fig. S13. IR spectrum of (1 <i>R</i> ( <i>S</i> ),5 <i>R</i> ( <i>S</i> ),7 <i>R</i> ( <i>S</i> ),8 <i>R</i> ( <i>S</i> ))-1,8-Bis([(1 <i>H</i> -imidazol-1-ylcarbonyl)oxy)methyl]-6-azadispiro[4.1.4.2]tridecane-6-oxyl (26) (KBr).....                                                                        | 11 |
| Fig. S14. IR spectrum of (1 <i>R</i> ( <i>S</i> ),5 <i>R</i> ( <i>S</i> ),7 <i>R</i> ( <i>S</i> ),8 <i>R</i> ( <i>S</i> ))-1,8-Bis([([3-(dimethylamino)propyl]amino)carbonyl)oxy)methyl]-6-azadispiro[4.1.4.2]tridecane-6-oxyl (27) (neat).....                                                                 | 11 |
| Fig. S15. IR spectrum of 1 <i>R</i> ( <i>S</i> ),5 <i>R</i> ( <i>S</i> ),7 <i>R</i> ( <i>S</i> ),8 <i>R</i> ( <i>S</i> ))-1,8-Bis([([3-methoxy-3-oxopropyl]amino)carbonyl)oxy)methyl]-6-azadispiro[4.1.4.2]tridecane-6-oxyl (28) (neat).....                                                                    | 12 |
| Fig. S16. IR spectrum of 1 <i>R</i> ( <i>S</i> ),5 <i>R</i> ( <i>S</i> ),7 <i>R</i> ( <i>S</i> ),8 <i>R</i> ( <i>S</i> ))-1,8-Bis([([2-carboxyethyl]amino)carbonyl)oxy)methyl]-6-azadispiro[4.1.4.2]tridecane-6-oxyl (29) (KBr).....                                                                            | 12 |
| Fig. S17. IR spectrum of (1 <i>R</i> ( <i>S</i> ),5 <i>R</i> ( <i>S</i> ),7 <i>R</i> ( <i>S</i> ),8 <i>R</i> ( <i>S</i> ))-1,8-Bis[(prop-2-yn-1-yloxy)methyl]-6-azadispiro[4.1.4.2]tridecane-6-oxyl (30) (neat).....                                                                                            | 13 |
| Fig. S18. IR spectrum of (1 <i>R</i> ( <i>S</i> ),5 <i>R</i> ( <i>S</i> ),7 <i>R</i> ( <i>S</i> ),8 <i>R</i> ( <i>S</i> ))-1-(Hydroxymethyl)-8-[(prop-2-yn-1-yloxy)methyl]-6-azadispiro[4.1.4.2]tridecane-6-oxyl (31) (neat).....                                                                               | 13 |
| Fig. S19. IR spectrum of (1 <i>R</i> ( <i>S</i> ),5 <i>R</i> ( <i>S</i> ),7 <i>R</i> ( <i>S</i> ),8 <i>R</i> ( <i>S</i> ))-1-(Hydroxymethyl)-8-([(1-[2,3,4,6-tetra- <i>O</i> -acetyl-β-D-galactopyranosyl]-1 <i>H</i> -1,2,3-triazol-4-yl)methoxy)methyl]-6-azadispiro[4.1.4.2]tridecane-6-oxyl (32) (KBr)..... | 14 |

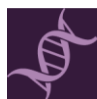

|                                                                                                                                                                                                                                                                                                                               |    |
|-------------------------------------------------------------------------------------------------------------------------------------------------------------------------------------------------------------------------------------------------------------------------------------------------------------------------------|----|
| Fig. S20. IR spectrum of (1 <i>R</i> ( <i>S</i> ),5 <i>R</i> ( <i>S</i> ),7 <i>R</i> ( <i>S</i> ),8 <i>R</i> ( <i>S</i> ))-1-(Hydroxymethyl)-8-((1-([β-D-galactopyranosyl]-1 <i>H</i> -1,2,3-triazol-4-yl)methoxy)methyl)-6-azadispiro[4.1.4.2]tridecane-6-oxyl (33) (KBr).....                                               | 14 |
| Fig. S21. IR spectrum of 2,2,5,5-Tetramethyl-3-(((1-((β-D-galactopyranosyl)-1 <i>H</i> -1,2,3-triazol-4-yl)methoxy)methyl)pyrrolidine-1-oxyl (35) (KBr).....                                                                                                                                                                  | 15 |
| Fig. S22. IR spectrum of 2,2,5,5-Tetramethyl-3-((prop-2-yn-1-yloxy)methyl)pyrrolidine-1-oxyl (37) (KBr) .....                                                                                                                                                                                                                 | 15 |
| Fig. S23. IR spectrum of 2,2,5,5-Tetramethyl-3-(((1-(2,3,4,6-tetra- <i>O</i> -acetyl-β-D-galactopyranosyl)-1 <i>H</i> -1,2,3-triazol-4-yl)methoxy)methyl)pyrrolidine-1-oxyl (38) (KBr).....                                                                                                                                   | 16 |
| 3. UV spectral data .....                                                                                                                                                                                                                                                                                                     | 17 |
| Fig. S24. UV spectrum of [(5 <i>R</i> ( <i>S</i> ),6 <i>R</i> ( <i>S</i> ))-1-Oxido-1-azaspiro[4.4]non-1-en-6-yl]methanol (9) .....                                                                                                                                                                                           | 17 |
| Fig. S25. UV spectrum of [(5 <i>R</i> ( <i>S</i> ),6 <i>R</i> ( <i>S</i> ))-1-Oxido-2-pent-4-en-1-yl-1-azaspiro[4.4]non-1-en-6-yl]methanol (12).....                                                                                                                                                                          | 17 |
| Fig. S26. UV spectrum of (1 <i>R</i> ( <i>S</i> ),5 <i>S</i> ( <i>R</i> ),7 <i>R</i> ( <i>S</i> ),8 <i>R</i> ( <i>S</i> ))-1,8-Bis[(acetyloxy)methyl]-6-azadispiro[4.1.4.2]tridecane-6-oxyl (17).....                                                                                                                         | 18 |
| Fig. S27. UV spectrum of (1 <i>R</i> ( <i>S</i> ),5 <i>R</i> ( <i>S</i> ),7 <i>R</i> ( <i>S</i> ),8 <i>R</i> ( <i>S</i> ))-1,8-Bis[Methoxycarbonyl]-6-azadispiro[4.1.4.2]tridecane-6-oxyl (22) .....                                                                                                                          | 18 |
| Fig. S28. UV spectrum of 1 <i>R</i> ( <i>S</i> ),5 <i>R</i> ( <i>S</i> ),7 <i>R</i> ( <i>S</i> ),8 <i>R</i> ( <i>S</i> ))-1,8-Dicarboxy-6-azadispiro[4.1.4.2]tridecane-6-oxyl (23a) in EtOH .....                                                                                                                             | 19 |
| Fig. S29. UV spectrum of (1 <i>R</i> ( <i>S</i> ),5 <i>R</i> ( <i>S</i> ),7 <i>R</i> ( <i>S</i> ),8 <i>R</i> ( <i>S</i> ))-1,8-Bis[(1 <i>H</i> -imidazol-1-ylcarbonyl)oxy)methyl]-6-azadispiro[4.1.4.2]tridecane-6-oxyl (26).....                                                                                             | 19 |
| Fig. S30. UV spectrum of (1 <i>R</i> ( <i>S</i> ),5 <i>R</i> ( <i>S</i> ),7 <i>R</i> ( <i>S</i> ),8 <i>R</i> ( <i>S</i> ))-1-(Hydroxymethyl)-8-[(prop-2-yn-1-yloxy)methyl]-6-azadispiro[4.1.4.2]tridecane-6-oxyl (31) .....                                                                                                   | 20 |
| 4. <sup>1</sup> H and <sup>13</sup> C NMR spectral data .....                                                                                                                                                                                                                                                                 | 21 |
| Fig. S31. <sup>1</sup> H NMR spectrum of [(5 <i>R</i> ( <i>S</i> ),6 <i>R</i> ( <i>S</i> ))-1-Oxido-1-azaspiro[4.4]non-1-en-6-yl]methanol (9) in CDCl <sub>3</sub> at 400 MHz.....                                                                                                                                            | 21 |
| Fig. S32. <sup>13</sup> C NMR spectrum of [(5 <i>R</i> ( <i>S</i> ),6 <i>R</i> ( <i>S</i> ))-1-Oxido-1-azaspiro[4.4]non-1-en-6-yl]methanol (9) in CDCl <sub>3</sub> at 125 MHz .....                                                                                                                                          | 21 |
| Fig. S33. <sup>1</sup> H NMR spectrum of [(5 <i>R</i> ( <i>S</i> ),6 <i>R</i> ( <i>S</i> ))-1-Oxido-2-(pent-4-en-1-yl)-1-azaspiro[4.4]non-1-en-6-yl]methanol (12) in CDCl <sub>3</sub> at 400 MHz.....                                                                                                                        | 22 |
| Fig. S34. <sup>13</sup> C NMR spectrum of [(5 <i>R</i> ( <i>S</i> ),6 <i>R</i> ( <i>S</i> ))-1-Oxido-2-(pent-4-en-1-yl)-1-azaspiro[4.4]non-1-en-6-yl]methanol (12) in CDCl <sub>3</sub> at 100 MHz.....                                                                                                                       | 22 |
| Fig. S35. <sup>1</sup> H NMR spectrum of (1 <i>R</i> ( <i>S</i> ),2 <i>R</i> ( <i>S</i> ),6 <i>a'</i> <i>R</i> ( <i>S</i> ),9 <i>a'</i> <i>R</i> ( <i>S</i> ))-Hexahydro-6'- <i>H</i> -spiro[cyclopentan-1,3'-cyclopenta[ <i>c</i> ]pyrrolo[1,2- <i>b</i> ]isoxazole]-2-ylmethanol (13) in CDCl <sub>3</sub> at 600 MHz.....  | 23 |
| Fig. S36. <sup>13</sup> C NMR spectrum of (1 <i>R</i> ( <i>S</i> ),2 <i>R</i> ( <i>S</i> ),6 <i>a'</i> <i>R</i> ( <i>S</i> ),9 <i>a'</i> <i>R</i> ( <i>S</i> ))-Hexahydro-6'- <i>H</i> -spiro[cyclopentan-1,3'-cyclopenta[ <i>c</i> ]pyrrolo[1,2- <i>b</i> ]isoxazole]-2-ylmethanol (13) in CDCl <sub>3</sub> at 150 MHz..... | 23 |
| Fig. S37. <sup>1</sup> H NMR spectrum of (1 <i>R</i> ( <i>S</i> ),5 <i>R</i> ( <i>S</i> ),7 <i>R</i> ( <i>S</i> ),8 <i>R</i> ( <i>S</i> ))-6-azadispiro[4.1.4.2]tridecan-1,8-diylldimethanol (14) in CDCl <sub>3</sub> at 400 MHz.....                                                                                        | 24 |
| Fig. S38. <sup>13</sup> C NMR spectrum of (1 <i>R</i> ( <i>S</i> ),5 <i>R</i> ( <i>S</i> ),7 <i>R</i> ( <i>S</i> ),8 <i>R</i> ( <i>S</i> ))-6-azadispiro[4.1.4.2]tridecan-1,8-diylldimethanol (14) in CDCl <sub>3</sub> at 100 MHz.....                                                                                       | 24 |
| Fig. S39. <sup>1</sup> H NMR spectrum of (1 <i>R</i> ( <i>S</i> ),5 <i>R</i> ( <i>S</i> ),7 <i>R</i> ( <i>S</i> ),8 <i>R</i> ( <i>S</i> ))-6-azadispiro[4.1.4.2]tridecan-1,8-diylldi(methylene) diacetate (16) in CDCl <sub>3</sub> at 500 MHz.....                                                                           | 25 |
| Fig. S40. <sup>13</sup> C NMR spectrum of (1 <i>R</i> ( <i>S</i> ),5 <i>R</i> ( <i>S</i> ),7 <i>R</i> ( <i>S</i> ),8 <i>R</i> ( <i>S</i> ))-6-azadispiro[4.1.4.2]tridecan-1,8-diylldi(methylene) diacetate (16) in CDCl <sub>3</sub> at 125 MHz.....                                                                          | 25 |
| Fig. S41. <sup>1</sup> H NMR spectrum of (4 <i>R</i> ( <i>S</i> ),5 <i>S</i> ( <i>R</i> ),7 <i>R</i> ( <i>S</i> ),8 <i>R</i> ( <i>S</i> ))-4,8-Bis[(acetyloxy)methyl]-6-azoniadispiro[4.1.4.2]tridec-1-ene trifluoroacetate (19) in CD <sub>3</sub> OD+CF <sub>3</sub> COOH at 400 MHz.....                                   | 26 |

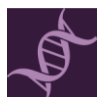

|                                                                                                                                                                                                                                                                                                                                                                                                                                 |    |
|---------------------------------------------------------------------------------------------------------------------------------------------------------------------------------------------------------------------------------------------------------------------------------------------------------------------------------------------------------------------------------------------------------------------------------|----|
| <b>Fig. S42.</b> $^{13}\text{C}$ NMR spectrum of (4 <i>R</i> ( <i>S</i> ),5 <i>S</i> ( <i>R</i> ),7 <i>R</i> ( <i>S</i> ),8 <i>R</i> ( <i>S</i> ))-4,8-Bis[(acetyloxy)methyl]-6-azoniadispiro[4.1.4.2]tridec-1-ene trifluoroacetate ( <b>19</b> ) in $\text{CD}_3\text{OD}+\text{CF}_3\text{COOH}$ at 100 MHz.....                                                                                                              | 26 |
| <b>Fig. S43.</b> $^1\text{H}$ NMR spectrum of (1 <i>R</i> ( <i>S</i> ),5 <i>R</i> ( <i>S</i> ),7 <i>R</i> ( <i>S</i> ),8 <i>R</i> ( <i>S</i> ))-6-Azadisporo[4.1.4.2]tridecan-1,8-dicarboxylic acid ( <b>20</b> ) in $\text{CD}_3\text{OD}$ at 400 MHz .....                                                                                                                                                                    | 27 |
| <b>Fig. S44.</b> $^1\text{H}$ NMR spectrum of (1 <i>R</i> ( <i>S</i> ),5 <i>R</i> ( <i>S</i> ),7 <i>R</i> ( <i>S</i> ),8 <i>R</i> ( <i>S</i> ))-6-Azadisporo[4.1.4.2]tridecan-1,8-dicarboxylic acid ( <b>20</b> ) in $\text{CD}_3\text{OD}$ at 75 MHz .....                                                                                                                                                                     | 27 |
| <b>Fig. S45.</b> $^1\text{H}$ NMR spectrum of Dimethyl (1 <i>R</i> ( <i>S</i> ),5 <i>R</i> ( <i>S</i> ),7 <i>R</i> ( <i>S</i> ),8 <i>R</i> ( <i>S</i> ))-6-azadispiro[4.1.4.2]tridecan-1,8-dicarboxylate ( <b>21</b> ) in $\text{CDCl}_3$ at 300 MHz .....                                                                                                                                                                      | 28 |
| <b>Fig. S46.</b> $^1\text{H}$ NMR spectrum of Dimethyl (1 <i>R</i> ( <i>S</i> ),5 <i>R</i> ( <i>S</i> ),7 <i>R</i> ( <i>S</i> ),8 <i>R</i> ( <i>S</i> ))-6-azadispiro[4.1.4.2]tridecan-1,8-dicarboxylate ( <b>21</b> ) in $\text{CDCl}_3$ at 75 MHz .....                                                                                                                                                                       | 28 |
| <b>Fig. S47.</b> $^1\text{H}$ NMR spectrum of (1 <i>R</i> ( <i>S</i> ),5 <i>R</i> ( <i>S</i> ),7 <i>R</i> ( <i>S</i> ),8 <i>R</i> ( <i>S</i> ))-1,8-Bis(methoxycarbonyl)-6-azoniadispiro[4.1.4.2]tridecane trifluoroacetate ( <b>22-red</b> ) in $\text{CD}_3\text{OD}+\text{CF}_3\text{COOH}$ at 300 MHz .....                                                                                                                 | 29 |
| <b>Fig. S48.</b> $^1\text{H}$ NMR spectrum of (1 <i>R</i> ( <i>S</i> ),5 <i>R</i> ( <i>S</i> ),7 <i>R</i> ( <i>S</i> ),8 <i>R</i> ( <i>S</i> ))-1,8-Dicarboxy-6-azoniadispiro[4.1.4.2]tridecane trifluoroacetate ( <b>23a-red</b> ) in $\text{CD}_3\text{OD}+\text{CF}_3\text{COOH}$ at 500 MHz .....                                                                                                                           | 29 |
| <b>Fig. S49.</b> $^{13}\text{C}$ NMR spectrum of (1 <i>R</i> ( <i>S</i> ),5 <i>R</i> ( <i>S</i> ),7 <i>R</i> ( <i>S</i> ),8 <i>R</i> ( <i>S</i> ))-1,8-Dicarboxy-6-azoniadispiro[4.1.4.2]tridecane trifluoroacetate ( <b>23a-red</b> ) in $\text{CD}_3\text{OD}+\text{CF}_3\text{COOH}$ at 125 MHz .....                                                                                                                        | 30 |
| <b>Fig. S50.</b> $^1\text{H}$ NMR spectrum of isomeric mixture of 1,8-Dicarboxy-6-azoniadispiro[4.1.4.2]tridecane trifluoroacetates ( <b>23a+23b+23c-red</b> ) in $\text{CD}_3\text{OD}+\text{CF}_3\text{COOH}$ at 500 MHz .....                                                                                                                                                                                                | 30 |
| <b>Fig. S51.</b> $^{13}\text{C}$ NMR spectrum of isomeric mixture of 1,8-Dicarboxy-6-azoniadispiro[4.1.4.2]tridecane trifluoroacetates ( <b>23a+23b+23c-red</b> ) in $\text{CD}_3\text{OD}+\text{CF}_3\text{COOH}$ at 125 MHz .....                                                                                                                                                                                             | 31 |
| <b>Fig. S52.</b> $^1\text{H}$ NMR spectrum of (1 <i>R</i> ( <i>S</i> ),5 <i>R</i> ( <i>S</i> ),7 <i>R</i> ( <i>S</i> ),8 <i>R</i> ( <i>S</i> ))-1,8-Bis([3-(dimethylamino)propyl]amino]carbonyl)oxy)methyl]-6-azoniadispiro[4.1.4.2]tridecane trifluoroacetate ( <b>27-red</b> ) in $\text{CD}_3\text{OD}+\text{CF}_3\text{COOD}$ at 500 MHz .....                                                                              | 31 |
| <b>Fig. S53.</b> $^{13}\text{C}$ NMR spectrum of (1 <i>R</i> ( <i>S</i> ),5 <i>R</i> ( <i>S</i> ),7 <i>R</i> ( <i>S</i> ),8 <i>R</i> ( <i>S</i> ))-1,8-Bis([3-(dimethylamino)propyl]amino]carbonyl)oxy)methyl]-6-azoniadispiro[4.1.4.2]tridecane trifluoroacetate ( <b>27-red</b> ) in $\text{CD}_3\text{OD}+\text{CF}_3\text{COOD}$ at 125 MHz .....                                                                           | 32 |
| <b>Fig. S54.</b> $^1\text{H}$ NMR spectrum of (1 <i>R</i> ( <i>S</i> ),5 <i>R</i> ( <i>S</i> ),7 <i>R</i> ( <i>S</i> ),8 <i>R</i> ( <i>S</i> ))-1,8-Bis([3-methoxy-3-oxopropyl]amino]carbonyl)oxy)methyl]-6-azoniadispiro[4.1.4.2]tridecane trifluoroacetate ( <b>28-red</b> ) in $\text{CD}_3\text{OD}+\text{CF}_3\text{COOD}$ at 500 MHz .....                                                                                | 32 |
| <b>Fig. S55.</b> $^{13}\text{C}$ NMR spectrum of (1 <i>R</i> ( <i>S</i> ),5 <i>R</i> ( <i>S</i> ),7 <i>R</i> ( <i>S</i> ),8 <i>R</i> ( <i>S</i> ))-1,8-Bis([3-methoxy-3-oxopropyl]amino]carbonyl)oxy)methyl]-6-azoniadispiro[4.1.4.2]tridecane trifluoroacetate ( <b>28-red</b> ) in $\text{CD}_3\text{OD}+\text{CF}_3\text{COOD}$ at 125 MHz .....                                                                             | 33 |
| <b>Fig. S56.</b> $^1\text{H}$ NMR spectrum of (1 <i>R</i> ( <i>S</i> ),5 <i>R</i> ( <i>S</i> ),7 <i>R</i> ( <i>S</i> ),8 <i>R</i> ( <i>S</i> ))-1,8-Bis([2-carboxyethyl]amino]carbonyl)oxy)methyl]-6-azoniadispiro[4.1.4.2]tridecane trifluoroacetate ( <b>29-red</b> ) in $\text{CD}_3\text{OD}+\text{CF}_3\text{COOD}$ at 400 MHz .....                                                                                       | 33 |
| <b>Fig. S57.</b> $^{13}\text{C}$ NMR spectrum of (1 <i>R</i> ( <i>S</i> ),5 <i>R</i> ( <i>S</i> ),7 <i>R</i> ( <i>S</i> ),8 <i>R</i> ( <i>S</i> ))-1,8-Bis([2-carboxyethyl]amino]carbonyl)oxy)methyl]-6-azoniadispiro[4.1.4.2]tridecane trifluoroacetate ( <b>29-red</b> ) in $\text{CD}_3\text{OD}+\text{CF}_3\text{COOD}$ at 150 MHz .....                                                                                    | 34 |
| <b>Fig. S58.</b> $^1\text{H}$ NMR spectrum of (1 <i>R</i> ( <i>S</i> ),5 <i>R</i> ( <i>S</i> ),7 <i>R</i> ( <i>S</i> ),8 <i>R</i> ( <i>S</i> ))-1-(Hydroxymethyl)-8-((1-[2,3,4,6-tetra- <i>O</i> -acetyl- $\beta$ -D-galactopyranosyl]-1 <i>H</i> -1,2,3-triazol-4-yl)methoxy)methyl)-6-azoniadispiro[4.1.4.2]tridecane trifluoroacetate ( <b>32-red</b> ) in $\text{CD}_3\text{OD}+\text{CF}_3\text{COOH}$ at 400 MHz .....    | 34 |
| <b>Fig. S59.</b> $^{13}\text{C}$ NMR spectrum of (1 <i>R</i> ( <i>S</i> ),5 <i>R</i> ( <i>S</i> ),7 <i>R</i> ( <i>S</i> ),8 <i>R</i> ( <i>S</i> ))-1-(Hydroxymethyl)-8-((1-[2,3,4,6-tetra- <i>O</i> -acetyl- $\beta$ -D-galactopyranosyl]-1 <i>H</i> -1,2,3-triazol-4-yl)methoxy)methyl)-6-azoniadispiro[4.1.4.2]tridecane trifluoroacetate ( <b>32-red</b> ) in $\text{CD}_3\text{OD}+\text{CF}_3\text{COOD}$ at 100 MHz ..... | 35 |



|                                                                                                                                                                                                                                                                                                                                                                                                               |    |
|---------------------------------------------------------------------------------------------------------------------------------------------------------------------------------------------------------------------------------------------------------------------------------------------------------------------------------------------------------------------------------------------------------------|----|
| <b>Fig. S60.</b> $^1\text{H}$ NMR spectrum of (1 <i>R</i> ( <i>S</i> ),5 <i>R</i> ( <i>S</i> ),7 <i>R</i> ( <i>S</i> ),8 <i>R</i> ( <i>S</i> ))-1-(Hydroxymethyl)-8-(((1- $[\beta$ -D-galactopyranosyl]-1 <i>H</i> -1,2,3-triazol-4-yl)methoxy)methyl)-6-azoniadispiro[4.1.4.2]tridecane trifluoroacetate ( <b>33-red</b> ) in $\text{CD}_3\text{OD}+\text{HCOOH}+\text{HOOC}\text{COOH}$ at 500 MHz .....    | 35 |
| <b>Fig. S61.</b> $^{13}\text{C}$ NMR spectrum of (1 <i>R</i> ( <i>S</i> ),5 <i>R</i> ( <i>S</i> ),7 <i>R</i> ( <i>S</i> ),8 <i>R</i> ( <i>S</i> ))-1-(Hydroxymethyl)-8-(((1- $[\beta$ -D-galactopyranosyl]-1 <i>H</i> -1,2,3-triazol-4-yl)methoxy)methyl)-6-azoniadispiro[4.1.4.2]tridecane trifluoroacetate ( <b>33-red</b> ) in $\text{CD}_3\text{OD}+\text{HCOOH}+\text{HOOC}\text{COOH}$ at 125 MHz ..... | 36 |
| <b>Fig. S62.</b> $^1\text{H}$ NMR spectrum of 2,2,5,5-Tetramethyl-3-(((1-(2,3,4,6-tetra- <i>O</i> -acetyl- $\beta$ -D-galactopyranosyl)-1 <i>H</i> -1,2,3-triazol-4-yl)methoxy)methyl)pyrrolidinium trifluoroacetate ( <b>38-red</b> ) in $\text{CD}_3\text{OD}+\text{CF}_3\text{COOH}$ at 300 MHz .....                                                                                                      | 36 |
| <b>Fig. S63.</b> $^1\text{H}$ NMR spectrum of 1-Hydroxy-2,2,5,5-tetramethyl-3-(((1-(( $\beta$ -D-galactopyranosyl)-1 <i>H</i> -1,2,3-triazol-4-yl)methoxy)methyl)pyrrolidinium trifluoroacetate ( <b>35-red</b> ) in $\text{CD}_3\text{OD}+\text{CF}_3\text{COOH}$ at 500 MHz .....                                                                                                                           | 37 |
| 5. 2D NMR spectral data .....                                                                                                                                                                                                                                                                                                                                                                                 | 38 |
| <b>Fig. S64.</b> $^1\text{H}$ - $^1\text{H}$ COSY NMR spectrum of (1 <i>R</i> ( <i>S</i> ),2 <i>R</i> ( <i>S</i> ),6 <i>a'</i> <i>R</i> ( <i>S</i> ),9 <i>a'</i> <i>R</i> ( <i>S</i> ))-Hexahydro-6' <i>H</i> -spiro[cyclopentan-1,3'-cyclopenta[ <i>c</i> ]pyrrolo[1,2- <i>b</i> ]isoxazol]-2-ylmethanol ( <b>13</b> ) in $\text{CDCl}_3$ . ....                                                             | 38 |
| <b>Fig. S65.</b> $^1\text{H}$ - $^{13}\text{C}$ HMBC NMR spectrum of (1 <i>R</i> ( <i>S</i> ),2 <i>R</i> ( <i>S</i> ),6 <i>a'</i> <i>R</i> ( <i>S</i> ),9 <i>a'</i> <i>R</i> ( <i>S</i> ))-Hexahydro-6' <i>H</i> -spiro[cyclopentan-1,3'-cyclopenta[ <i>c</i> ]pyrrolo[1,2- <i>b</i> ]isoxazol]-2-ylmethanol ( <b>13</b> ) in $\text{CDCl}_3$ . ....                                                          | 38 |
| <b>Fig. S66.</b> $^1\text{H}$ - $^{13}\text{C}$ HSQC NMR spectrum of (1 <i>R</i> ( <i>S</i> ),2 <i>R</i> ( <i>S</i> ),6 <i>a'</i> <i>R</i> ( <i>S</i> ),9 <i>a'</i> <i>R</i> ( <i>S</i> ))-Hexahydro-6' <i>H</i> -spiro[cyclopentan-1,3'-cyclopenta[ <i>c</i> ]pyrrolo[1,2- <i>b</i> ]isoxazol]-2-ylmethanol ( <b>13</b> ) in $\text{CDCl}_3$ . ....                                                          | 39 |
| <b>Fig. S67.</b> $^1\text{H}$ - $^1\text{H}$ NOESY NMR spectrum of (1 <i>R</i> ( <i>S</i> ),2 <i>R</i> ( <i>S</i> ),6 <i>a'</i> <i>R</i> ( <i>S</i> ),9 <i>a'</i> <i>R</i> ( <i>S</i> ))-Hexahydro-6' <i>H</i> -spiro[cyclopentan-1,3'-cyclopenta[ <i>c</i> ]pyrrolo[1,2- <i>b</i> ]isoxazol]-2-ylmethanol ( <b>13</b> ) in $\text{CDCl}_3$ . ....                                                            | 39 |
| <b>Fig. S68.</b> $^1\text{H}$ - $^1\text{H}$ COSY NMR spectrum of (4 <i>R</i> ( <i>S</i> ),5 <i>S</i> ( <i>R</i> ),7 <i>R</i> ( <i>S</i> ),8 <i>R</i> ( <i>S</i> ))-4,8-Bis[(acetyloxy)methyl]-6-azoniadispiro[4.1.4.2]tridec-1-ene trifluoroacetate ( <b>19</b> ) in $\text{CD}_3\text{OD}+\text{CF}_3\text{COOH}$ . ....                                                                                    | 40 |
| <b>Fig. S69.</b> $^1\text{H}$ - $^{13}\text{C}$ HSQC NMR spectrum of (4 <i>R</i> ( <i>S</i> ),5 <i>S</i> ( <i>R</i> ),7 <i>R</i> ( <i>S</i> ),8 <i>R</i> ( <i>S</i> ))-4,8-Bis[(acetyloxy)methyl]-6-azoniadispiro[4.1.4.2]tridec-1-ene trifluoroacetate ( <b>19</b> ) in $\text{CD}_3\text{OD}+\text{CF}_3\text{COOH}$ . ....                                                                                 | 40 |
| <b>Fig. S70.</b> $^1\text{H}$ - $^{13}\text{C}$ HMBC NMR spectrum of (4 <i>R</i> ( <i>S</i> ),5 <i>S</i> ( <i>R</i> ),7 <i>R</i> ( <i>S</i> ),8 <i>R</i> ( <i>S</i> ))-4,8-Bis[(acetyloxy)methyl]-6-azoniadispiro[4.1.4.2]tridec-1-ene trifluoroacetate ( <b>19</b> ) in $\text{CD}_3\text{OD}+\text{CF}_3\text{COOH}$ . ....                                                                                 | 41 |
| 6. EPR measurements. ....                                                                                                                                                                                                                                                                                                                                                                                     | 42 |
| <b>Fig. S71.</b> The kinetics of decrease of EPR signal of nitroxides <b>5</b> , <b>29</b> and <b>33</b> in solution of ascorbic acid (100mM) and glutathione (5mM).....                                                                                                                                                                                                                                      | 42 |
| <b>Fig. S72.</b> The dependence of first order reaction rate constants versus ascorbic acid concentration of the radicals <b>5</b> , <b>29</b> and <b>33</b> . ....                                                                                                                                                                                                                                           | 42 |
| <b>Fig. S73.</b> Data for calculation of partition coefficients of the radicals <b>5</b> , <b>29</b> and <b>33</b> . ....                                                                                                                                                                                                                                                                                     | 43 |
| <b>Table S1.</b> Experimental details of X-ray diffraction experiments for compounds investigated.....                                                                                                                                                                                                                                                                                                        | 44 |

## 2. IR spectral data.

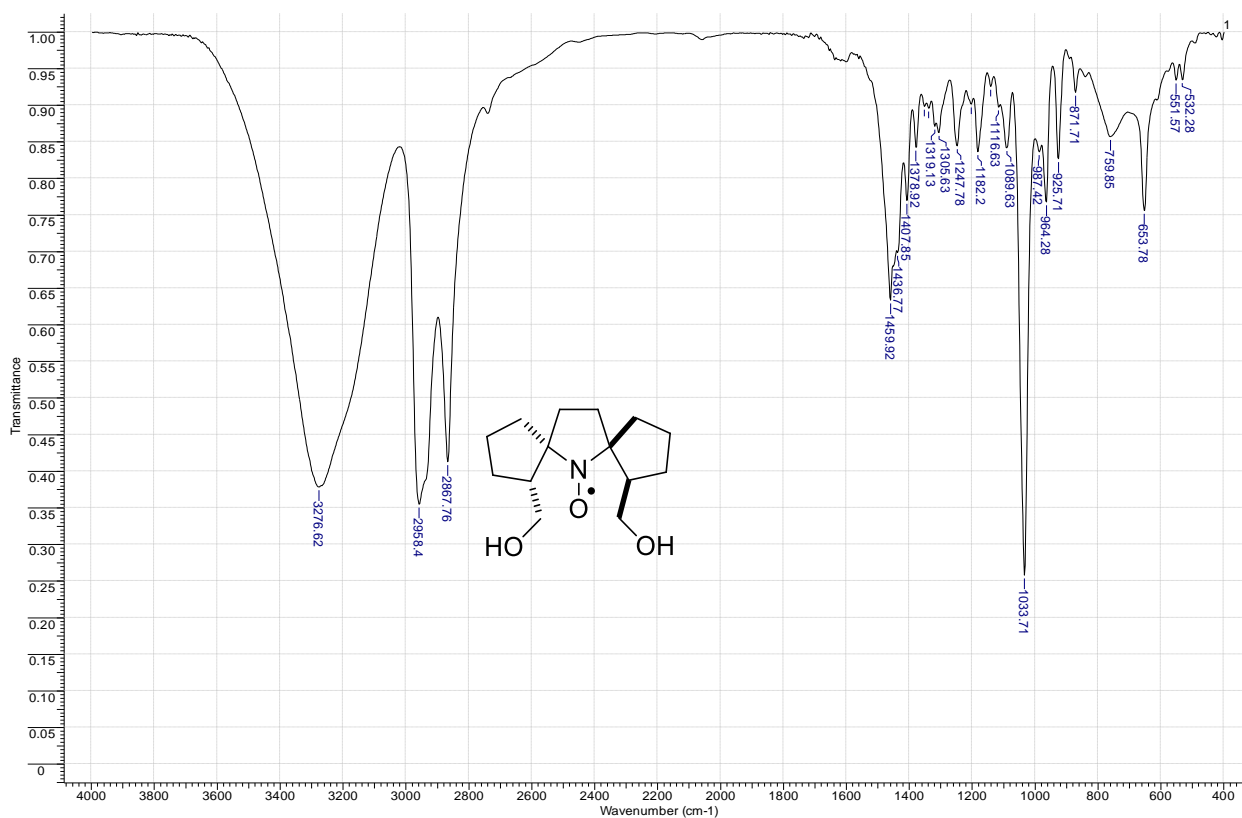

**Fig. S1.** IR spectrum of (1R(S),5R(S),7R(S),8R(S))-1,8-Bis(hydroxymethyl)-6-azadispiro[4.1.4.2]tridecane 6-oxyl (5) (KBr)

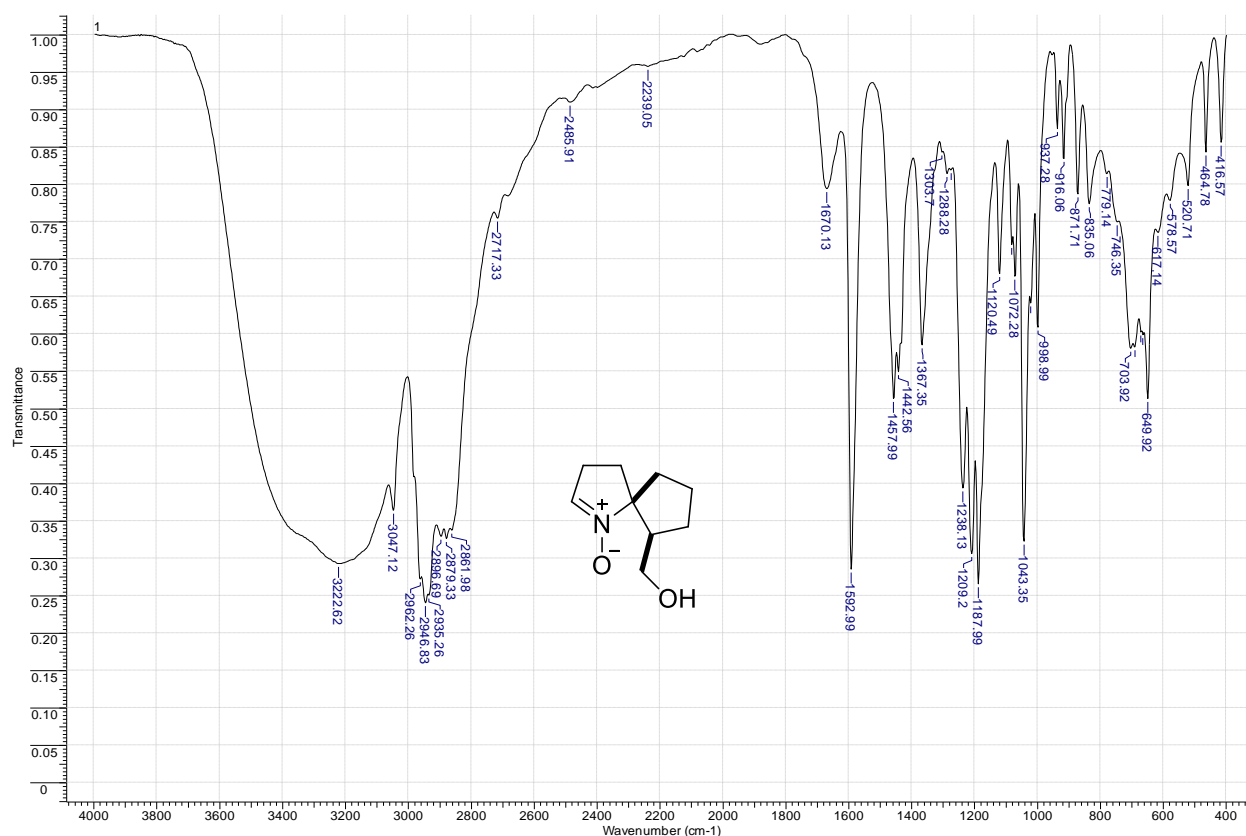

**Fig. S2.** IR spectrum of [(5R(S),6R(S))-1-Oxido-1-azaspiro[4.4]non-1-en-6-yl]methanol (9) (KBr)

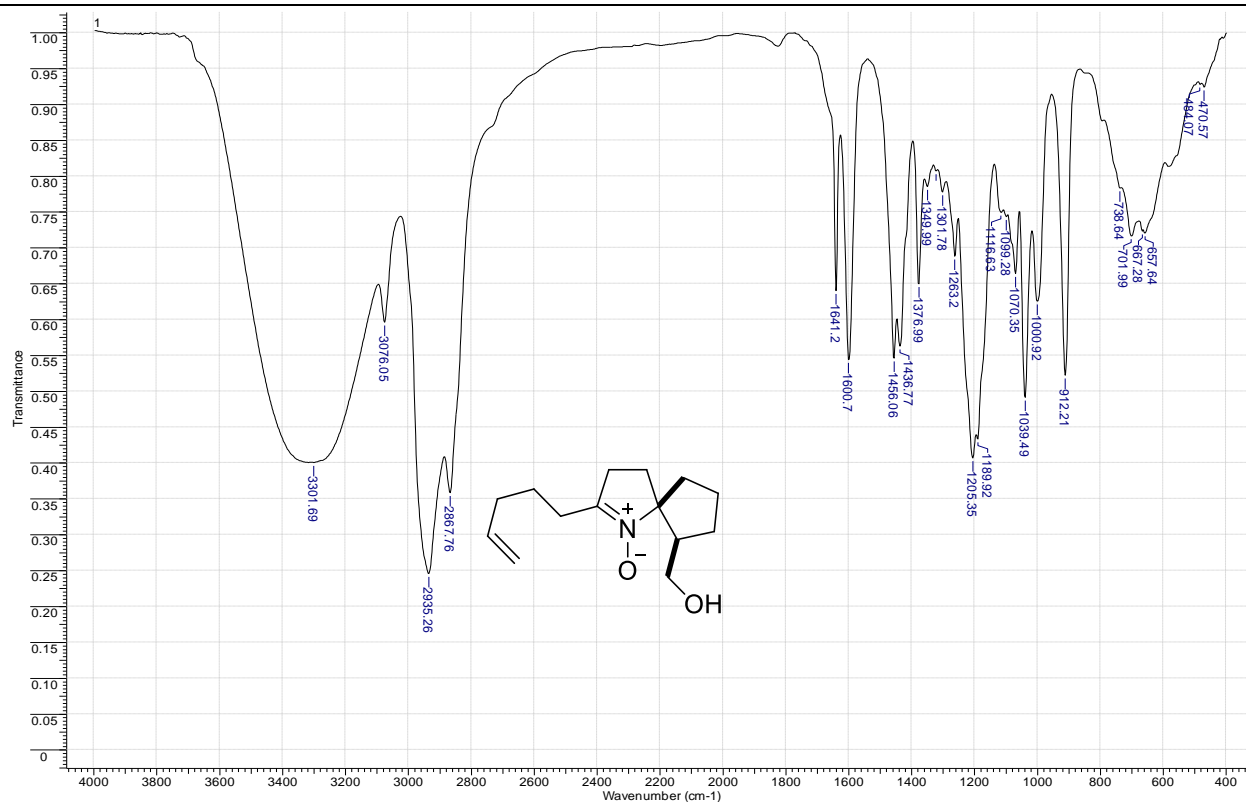

**Fig. S3.** IR spectrum of [(5R(S),6R(S))-1-Oxido-2-pent-4-en-1-yl-1-azaspiro[4.4]non-1-en-6-yl]methanol (12) (neat)

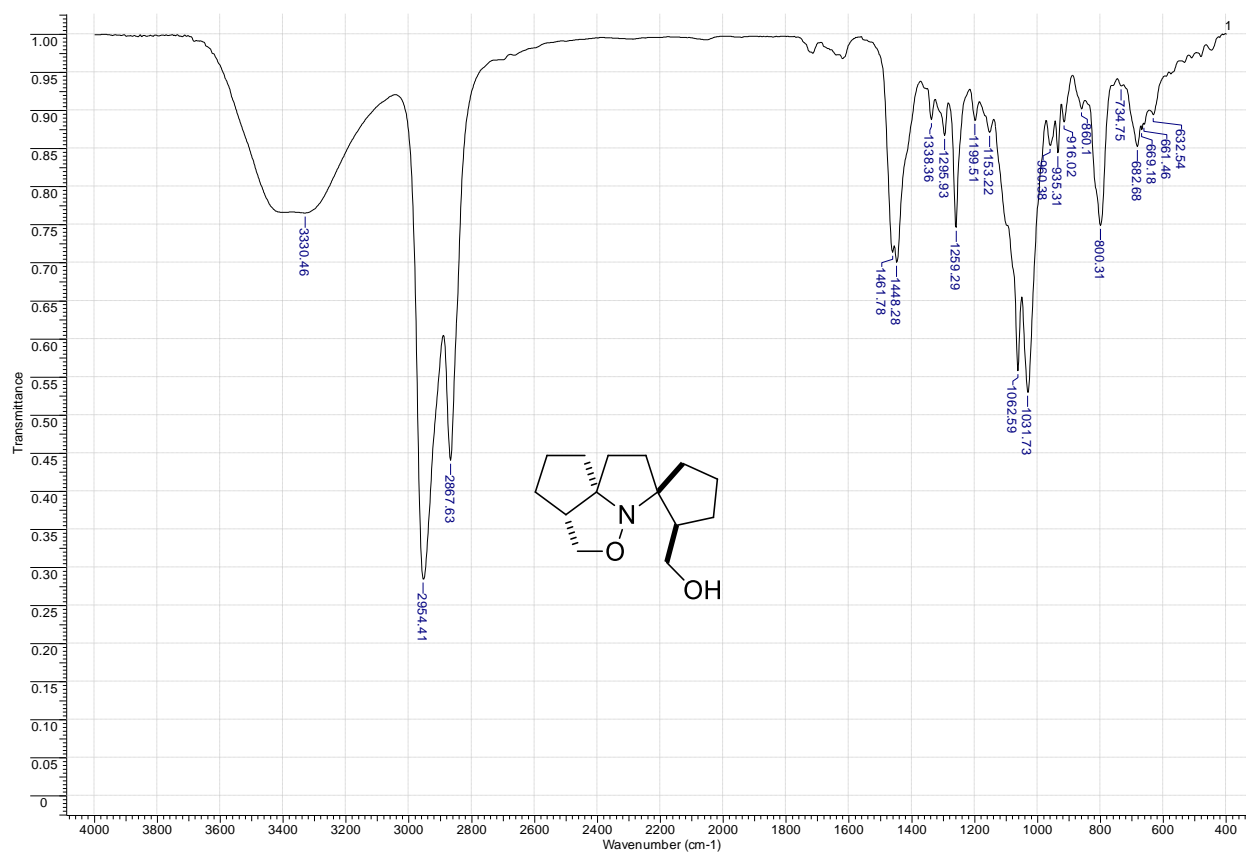

**Fig. S4.** IR spectrum of (1R(S),2R(S),6a'R(S),9a'R(S))-Hexahydro-6'H-spiro[cyclopentan-1,3'-cyclopenta[c]pyrrolo[1,2-b]isoxazol]-2-ylmethanol (13) (neat)



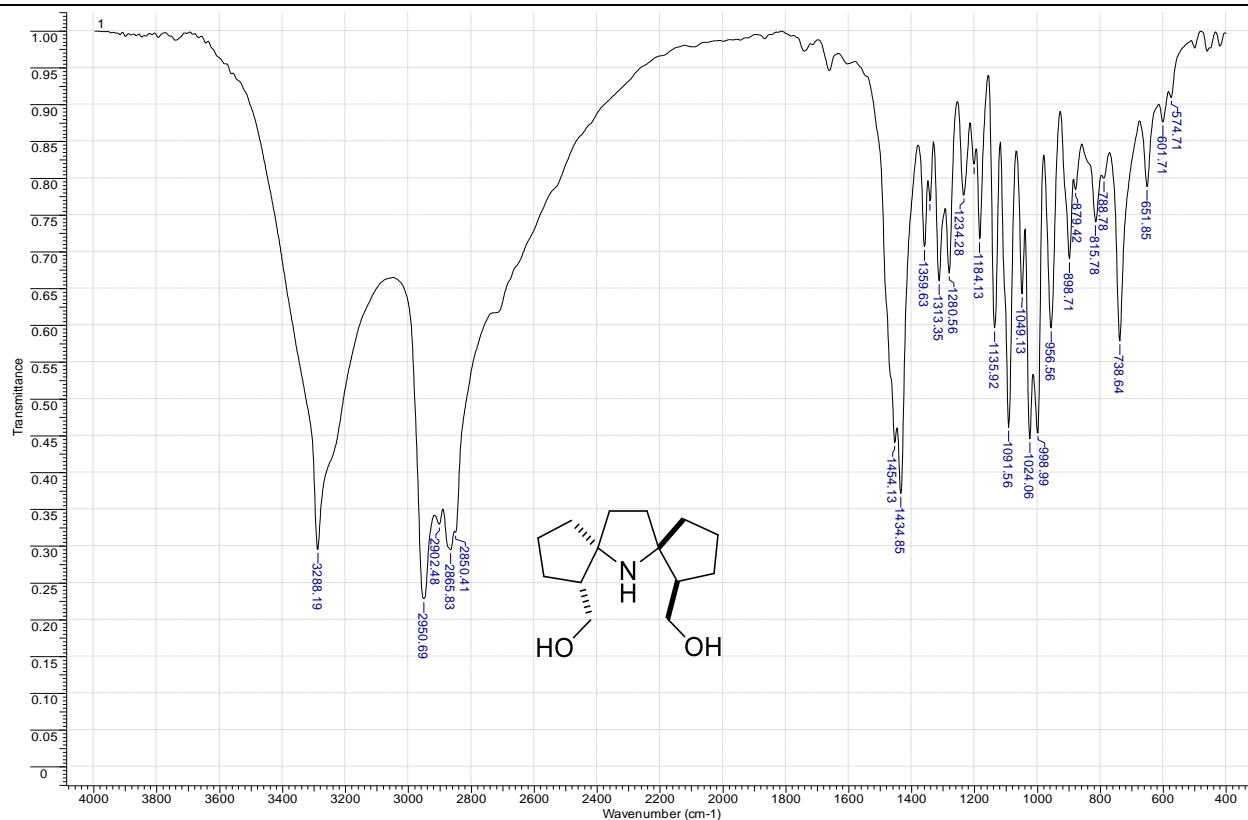

**Fig. S5.** IR spectrum of (1R(S),5R(S),7R(S),8R(S))-6-azadispiro[4.1.4.2]tridecan-1,8-diylldimethanol (**14**) (KBr)

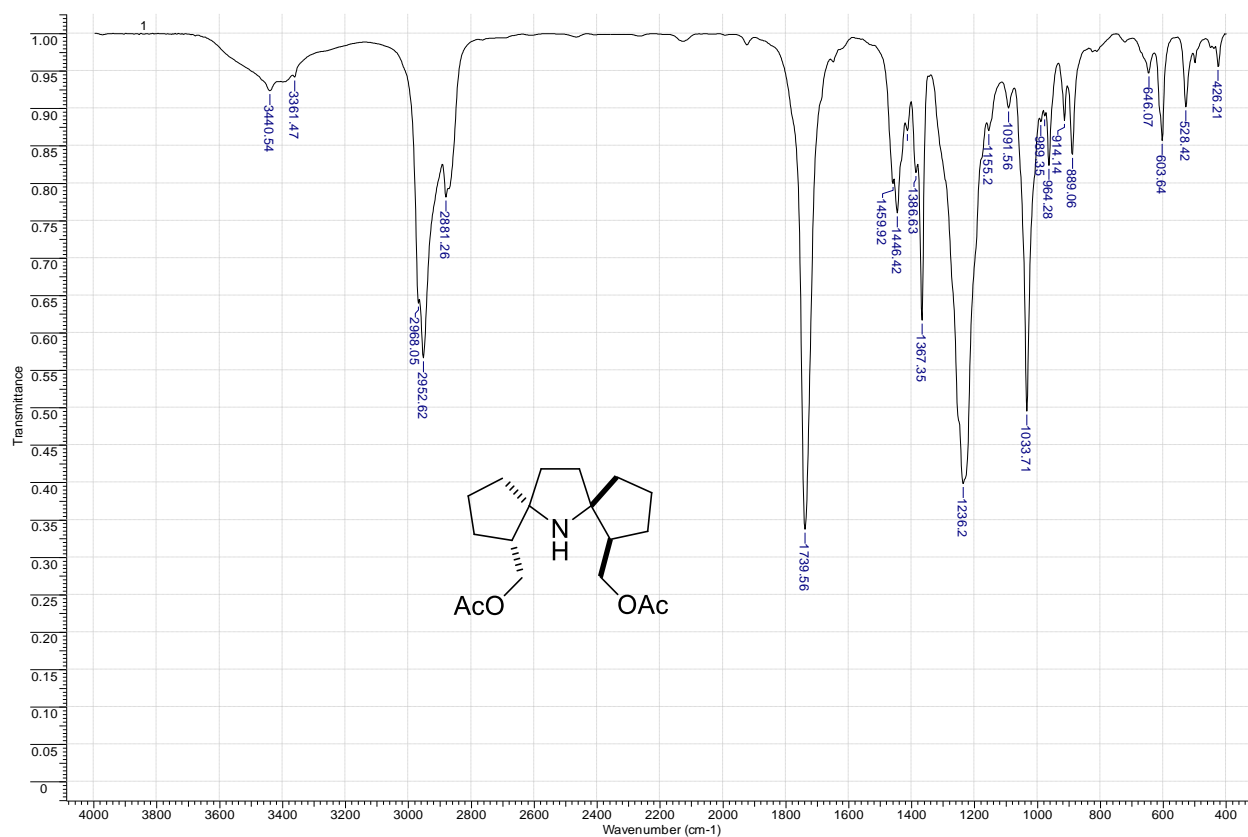

**Fig. S6.** IR spectrum of (1R(S),5R(S),7R(S),8R(S))-6-azadispiro[4.1.4.2]tridecan-1,8-diylldi(methylene) diacetate (**16**) (neat)

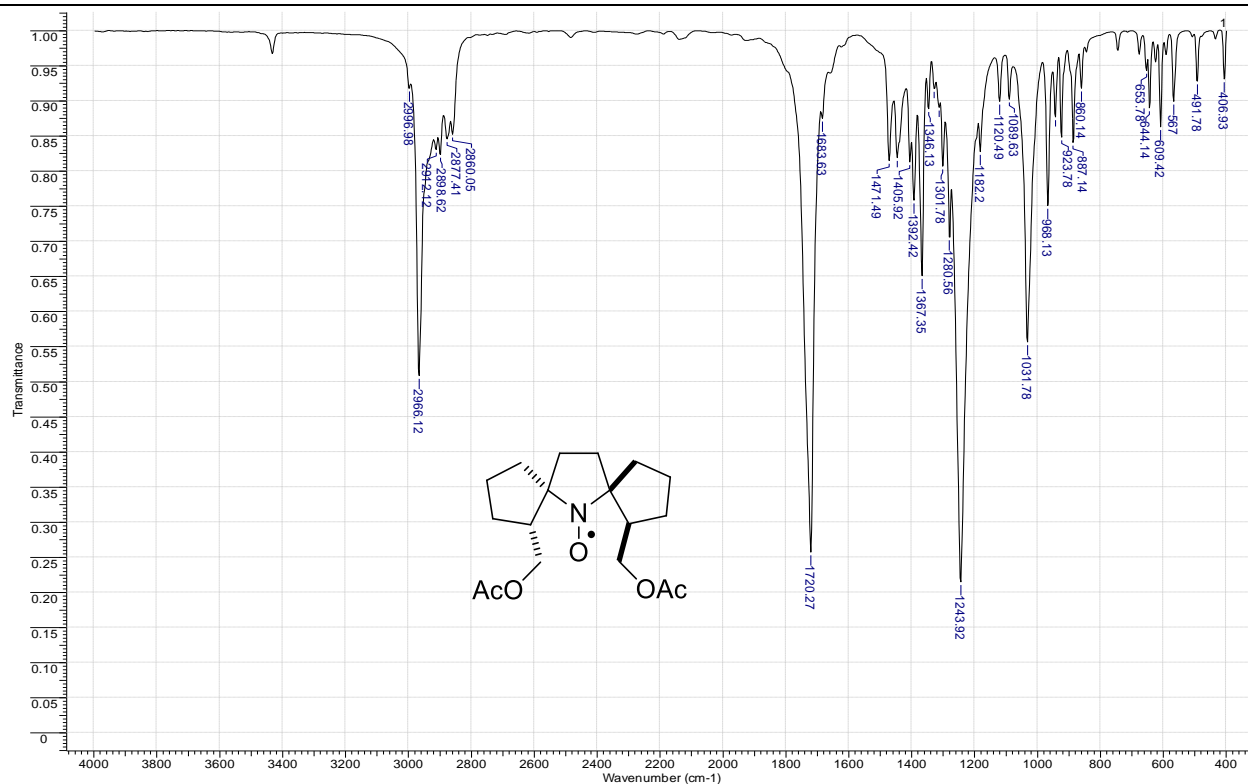

**Fig. S7.** IR spectrum of 1R(S),5R(S),7R(S),8R(S))-1,8-Bis[(acetyloxy)methyl]-6-azadispiro[4.1.4.2]tridecane-6-oxyl (17) (KBr)

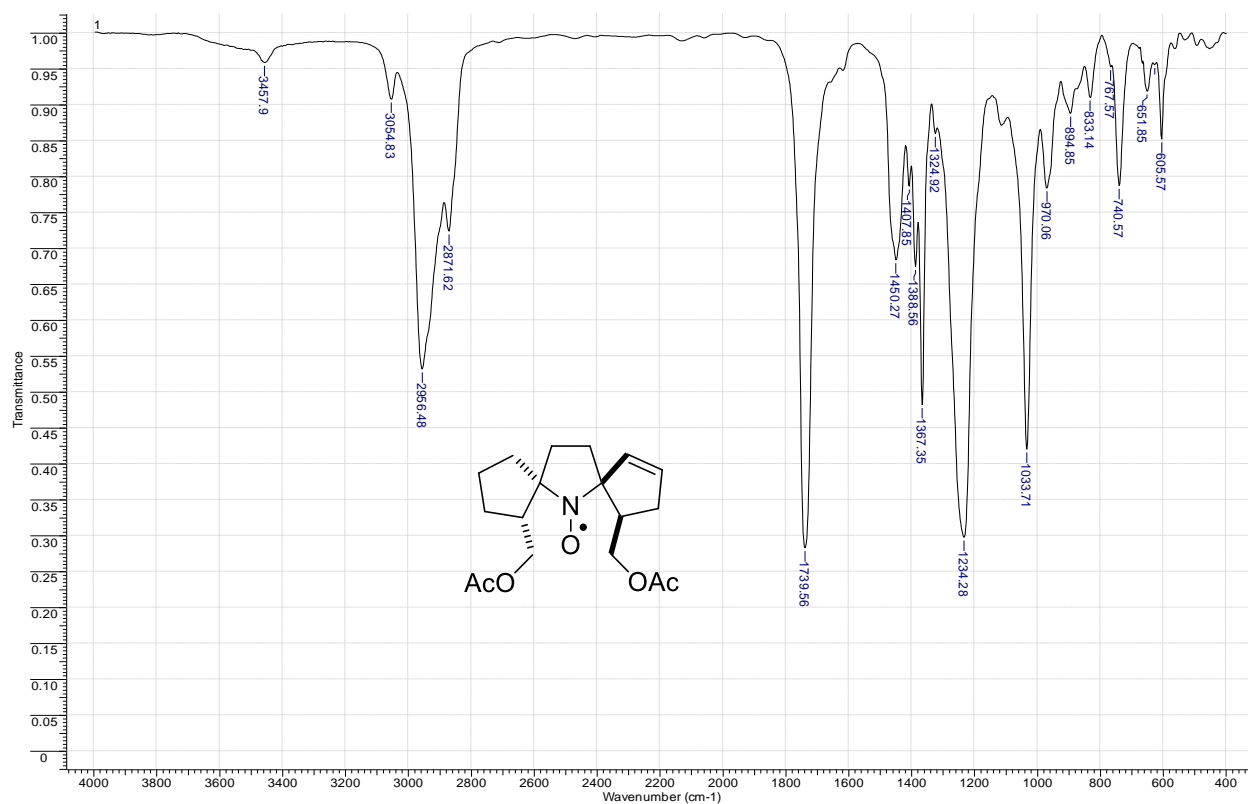

**Fig. S8.** IR spectrum of (4R(S),5S(R),7R(S),8R(S))-4,8-Bis[(acetyloxy)methyl]-6-azadispiro[4.1.4.2]tridec-1-ene-6-oxyl (18) (neat)



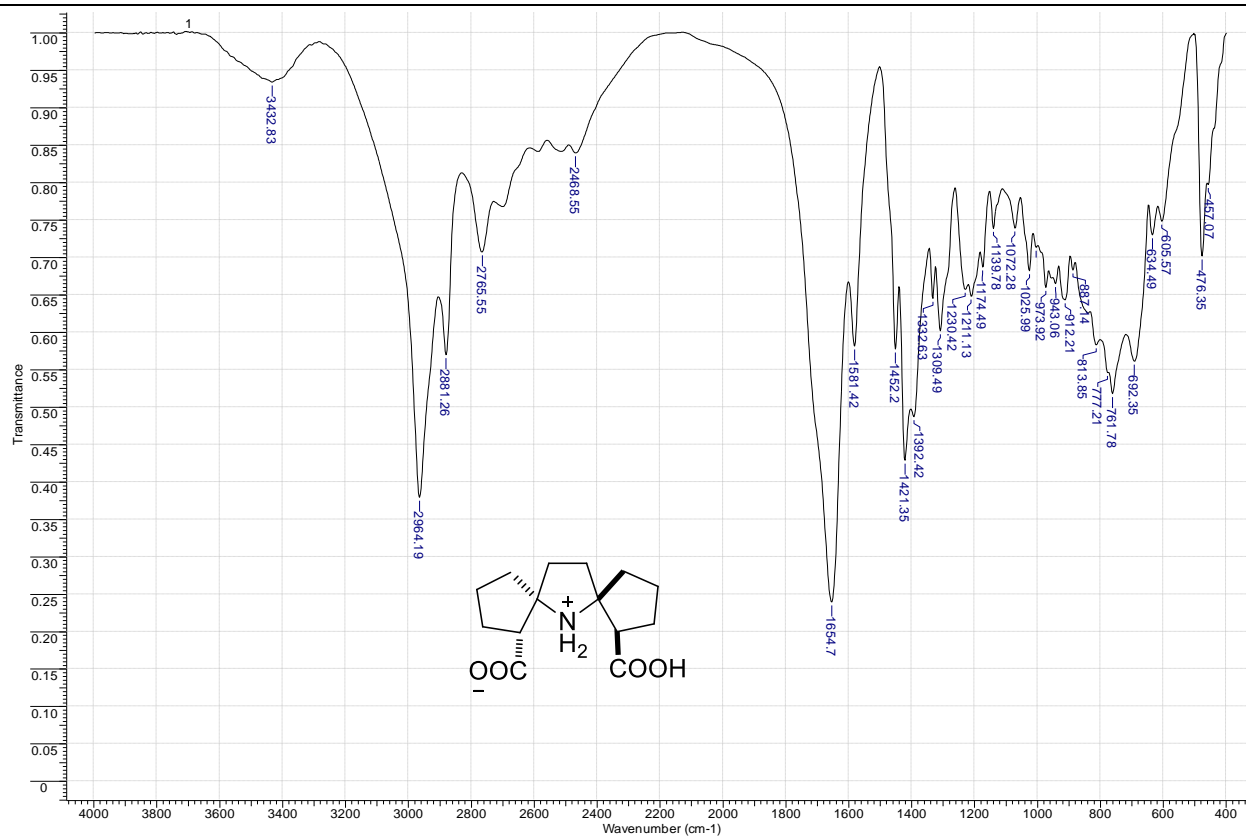

**Fig. S9.** IR spectrum of. (1R(S),5R(S),7R(S),8R(S))-6-Azadispiro[4.1.4.2]tridecan-1,8-dicarboxylic acid 20 (KBr)

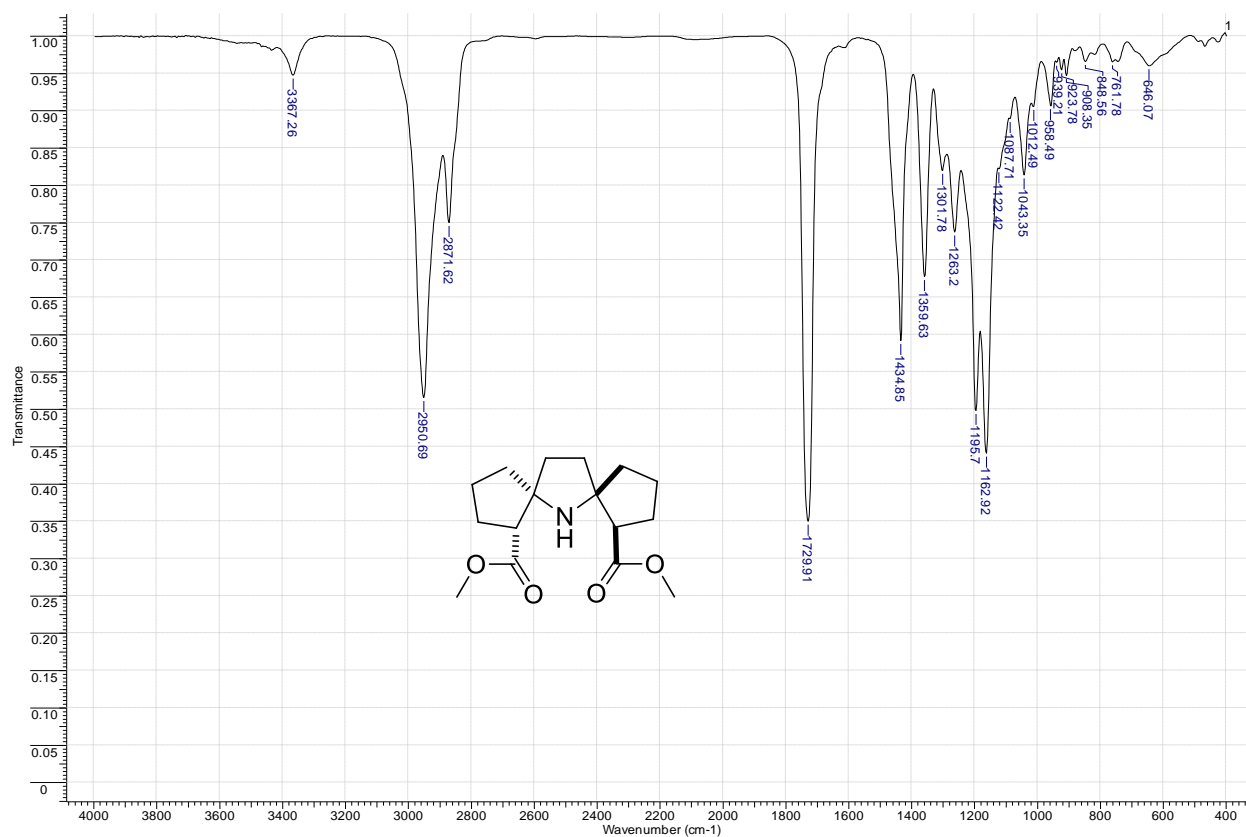

**Fig. S10.** IR spectrum of Dimethyl (1R(S),5R(S),7R(S),8R(S))-6-azadispiro[4.1.4.2]tridecan-1,8-dicarboxylate (21) (neat)

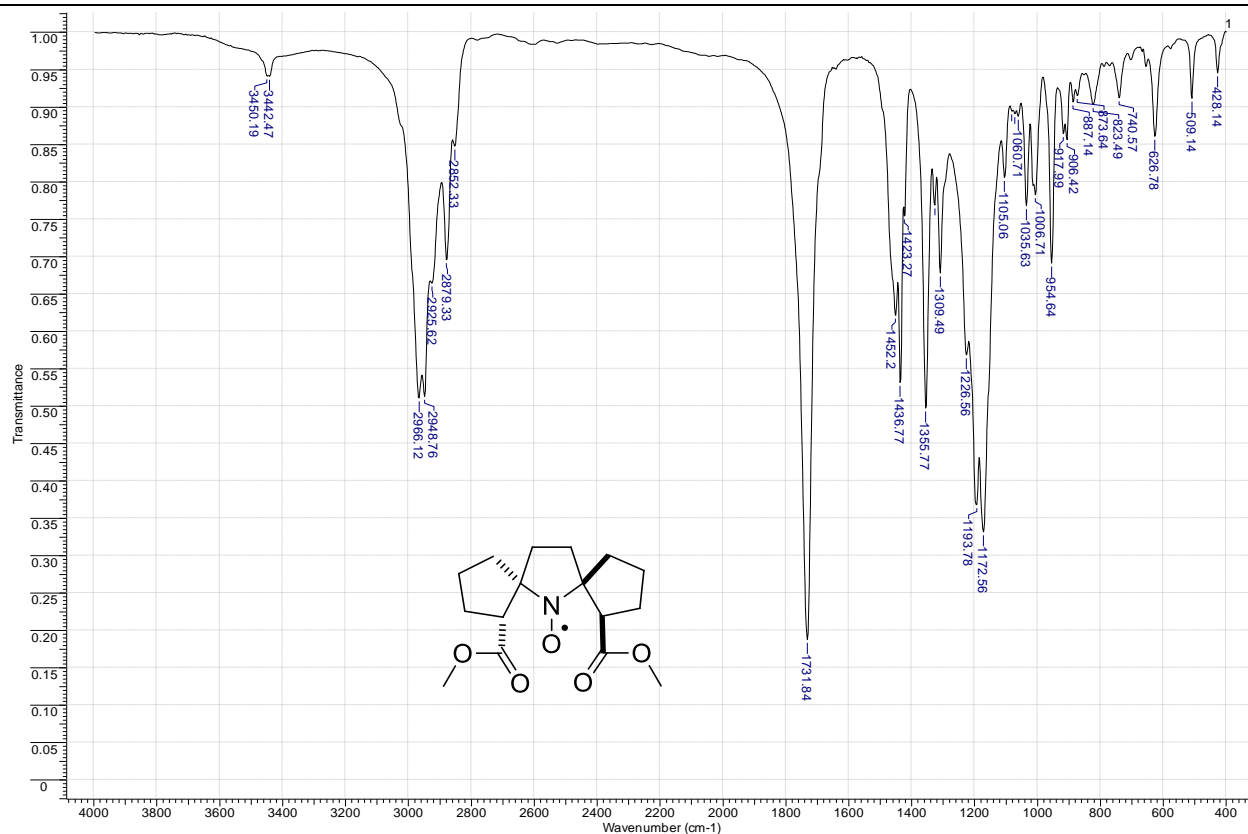

**Fig. S11.** IR spectrum of (1R(S),5R(S),7R(S),8R(S))-1,8-Bis(methoxycarbonyl)-6-azadispiro[4.1.4.2]tridecane-6-oxyl (22) (KBr)

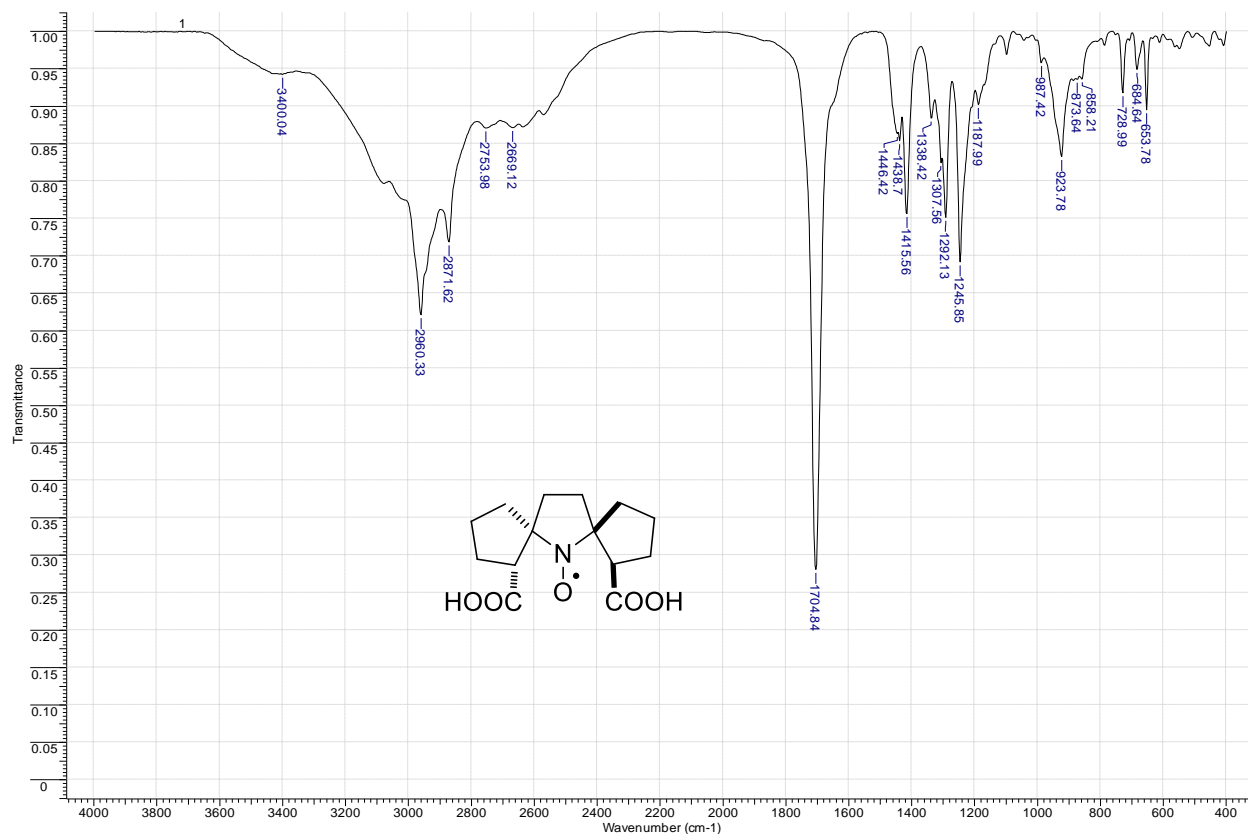

**Fig. S12.** IR spectrum of (1R(S),5R(S),7R(S),8R(S))-1,8-Dicarboxy-6-azadispiro[4.1.4.2]tridecane-6-oxyl (23a) (KBr)

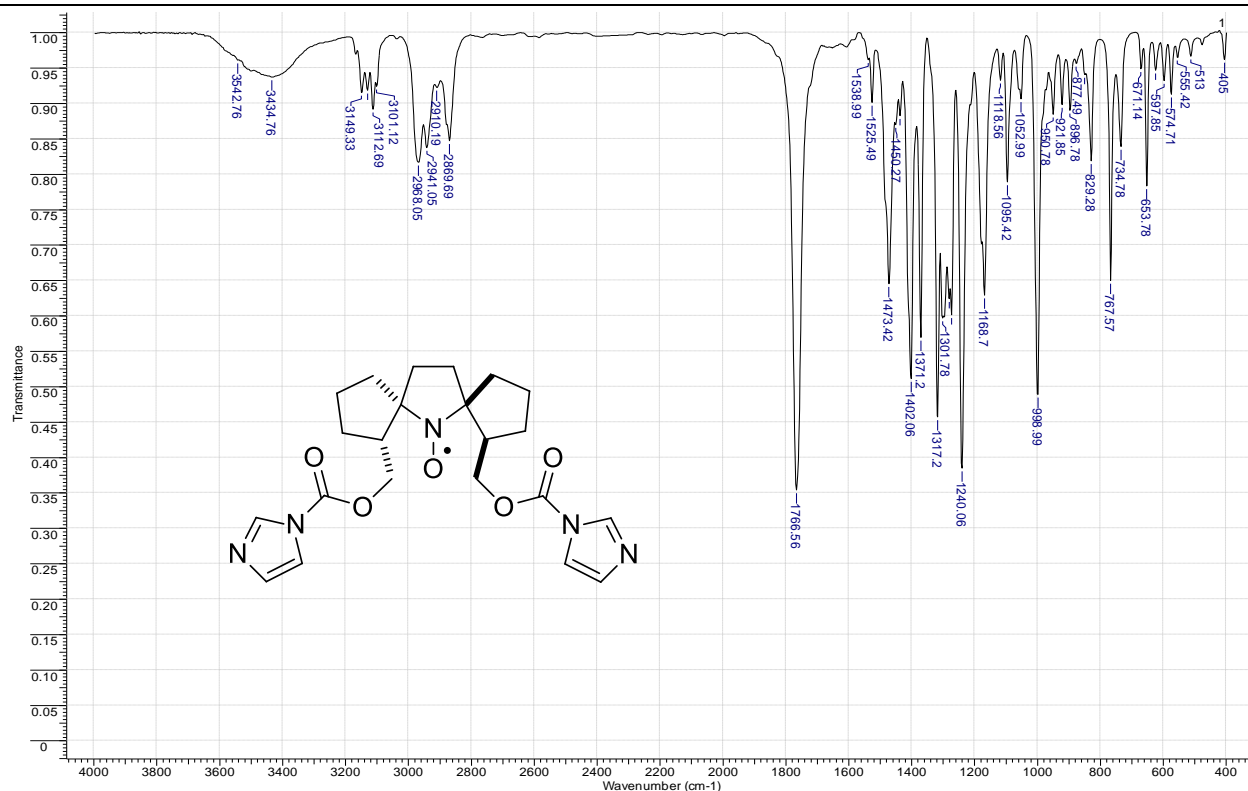

**Fig. S13.** IR spectrum of (1R(S),5R(S),7R(S),8R(S))-1,8-Bis[({1H-imidazol-1-ylcarbonyl}oxy)methyl]-6-azadispiro[4.1.4.2]tridecane-6-oxyl (**26**) (KBr)

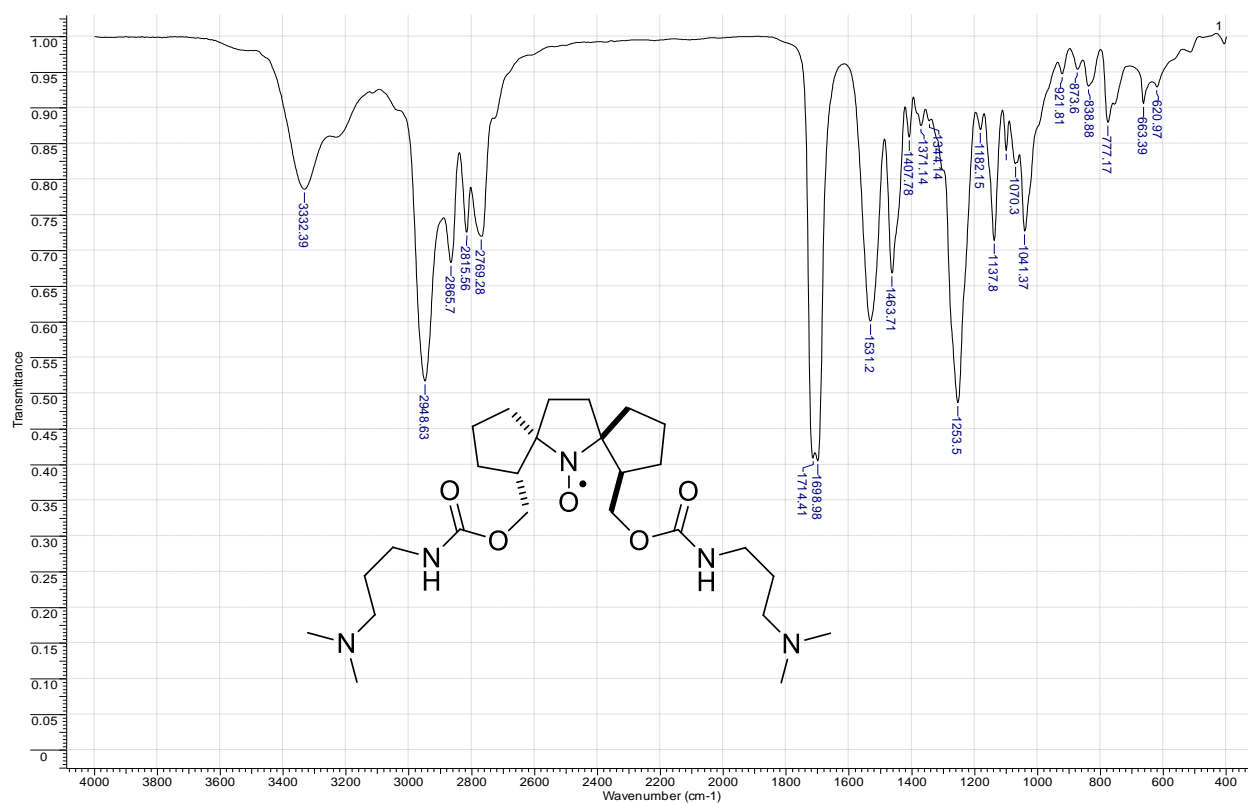

**Fig. S14.** IR spectrum of (1R(S),5R(S),7R(S),8R(S))-1,8-Bis[(((3-(dimethylamino)propyl)amino)carbonyl)oxy)methyl]-6-azadispiro[4.1.4.2]tridecane-6-oxyl (**27**) (neat)

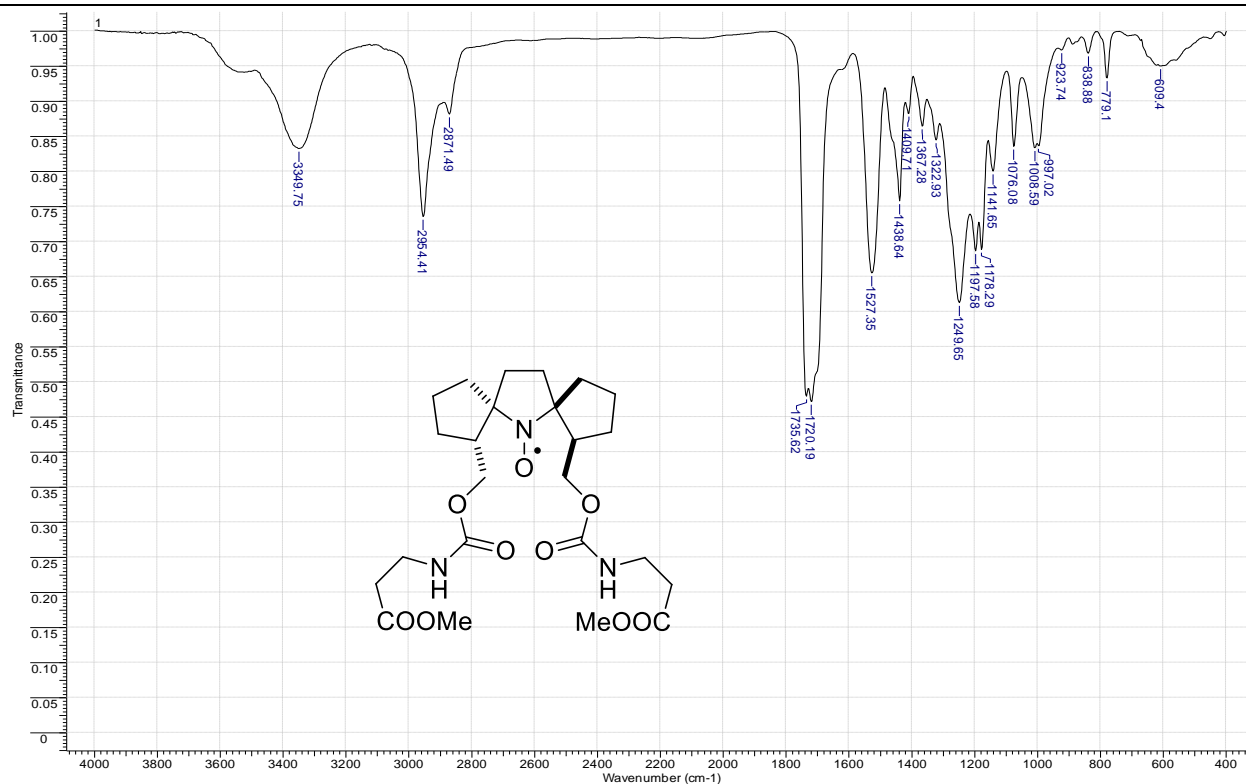

**Fig. S15.** IR spectrum of 1R(S),5R(S),7R(S),8R(S)-1,8-Bis[(((3-methoxy-3-oxopropyl)amino)carbonyl)oxy)methyl]-6-azadispiro[4.1.4.2]tridecane-6-oxyl (28) (neat)

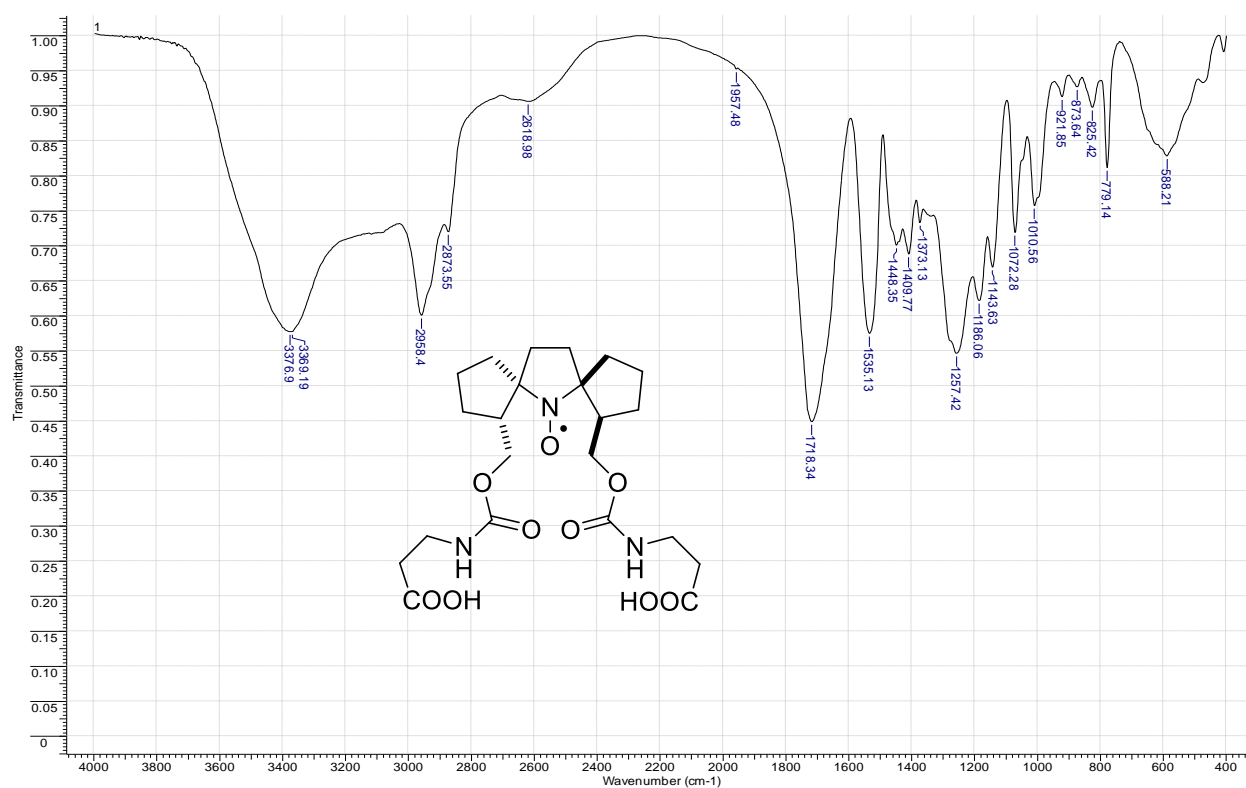

**Fig. S16.** IR spectrum of 1R(S),5R(S),7R(S),8R(S)-1,8-Bis[(((2-carboxyethyl)amino)carbonyl)oxy)methyl]-6-azadispiro[4.1.4.2]tridecane-6-oxyl (29) (KBr)

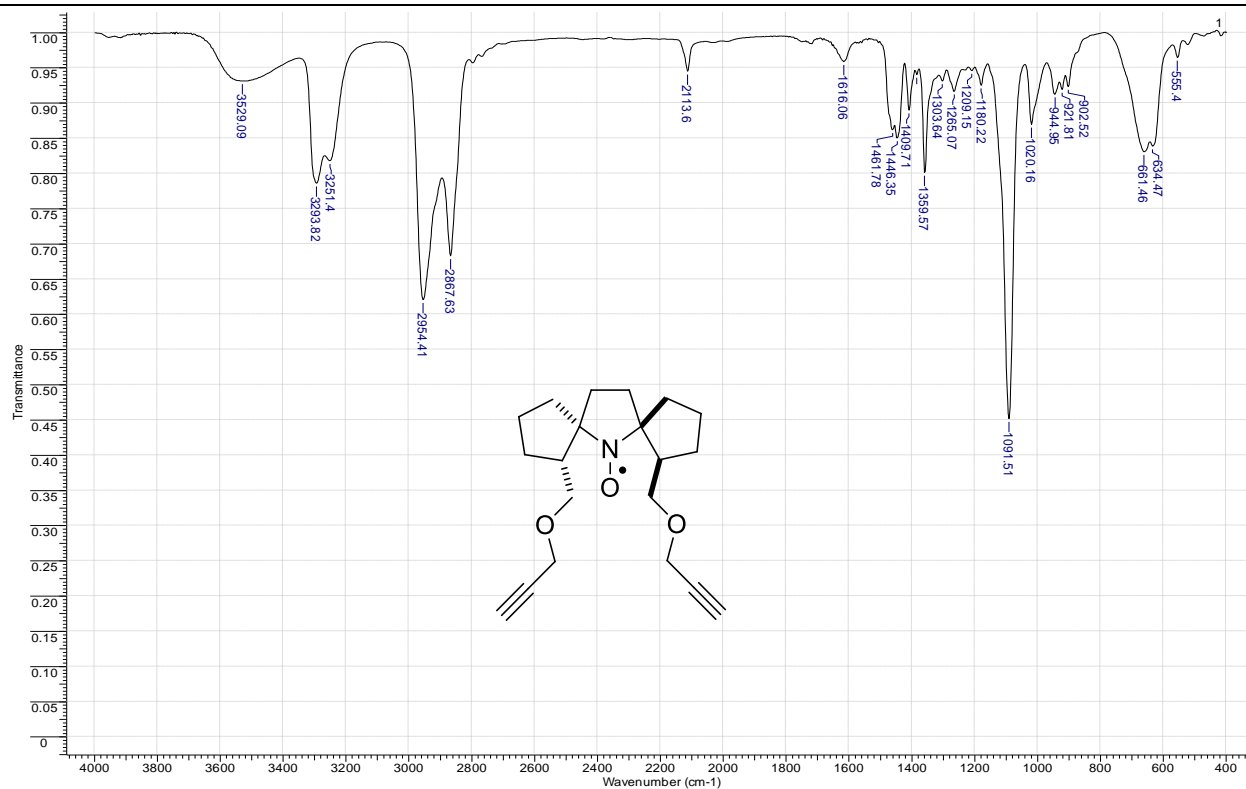

**Fig. S17.** IR spectrum of (1R(S),5R(S),7R(S),8R(S))-1,8-Bis[(prop-2-yn-1-yloxy)methyl]-6-azadispiro[4.1.4.2]tridecane-6-oxyl (30) (neat)

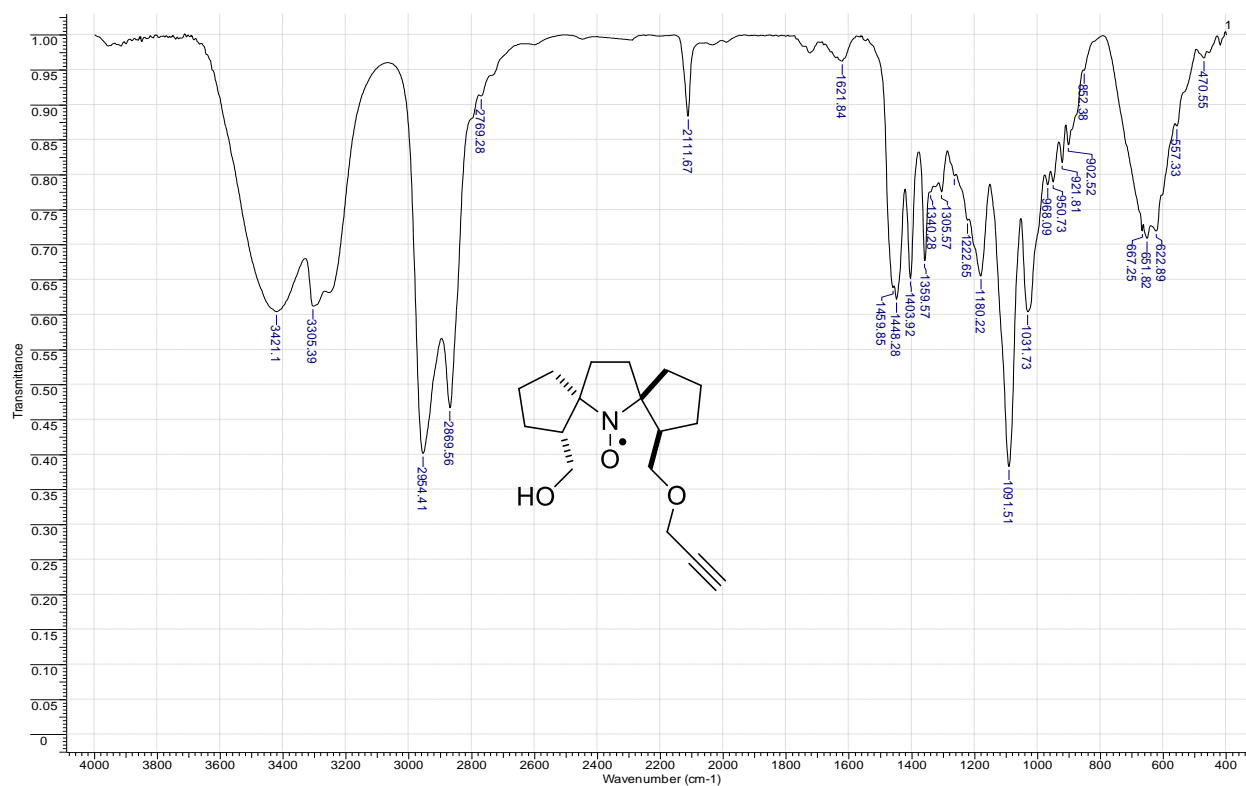

**Fig. S18.** IR spectrum of (1R(S),5R(S),7R(S),8R(S))-1-(Hydroxymethyl)-8-[(prop-2-yn-1-yloxy)methyl]-6-azadispiro[4.1.4.2]tridecane-6-oxyl (31) (neat)

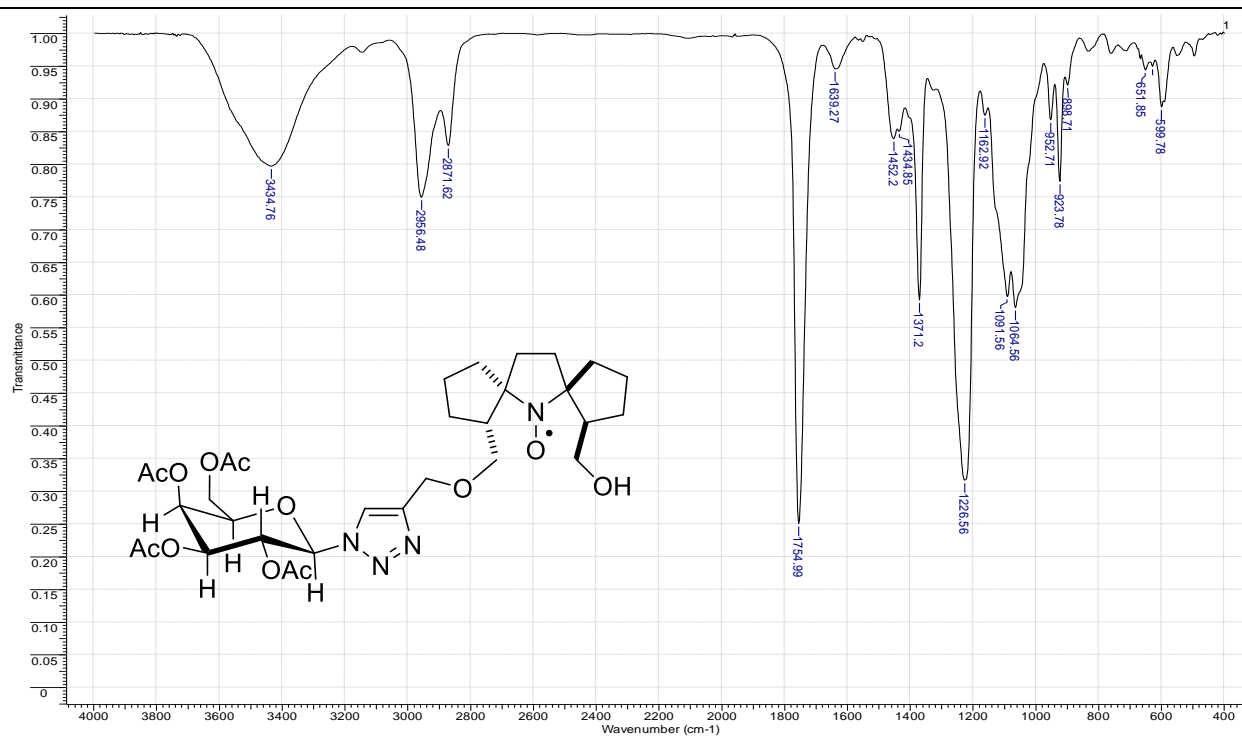

**Fig. S19.** IR spectrum of (1R(S),5R(S),7R(S),8R(S))-1-(Hydroxymethyl)-8-((1-[2,3,4,6-tetra-O-acetyl-β-D-galactopyranosyl]-1H-1,2,3-triazol-4-yl)methoxy)methyl)-6-azadispiro[4.1.4.2]tridecane-6-oxyl (32) (KBr)

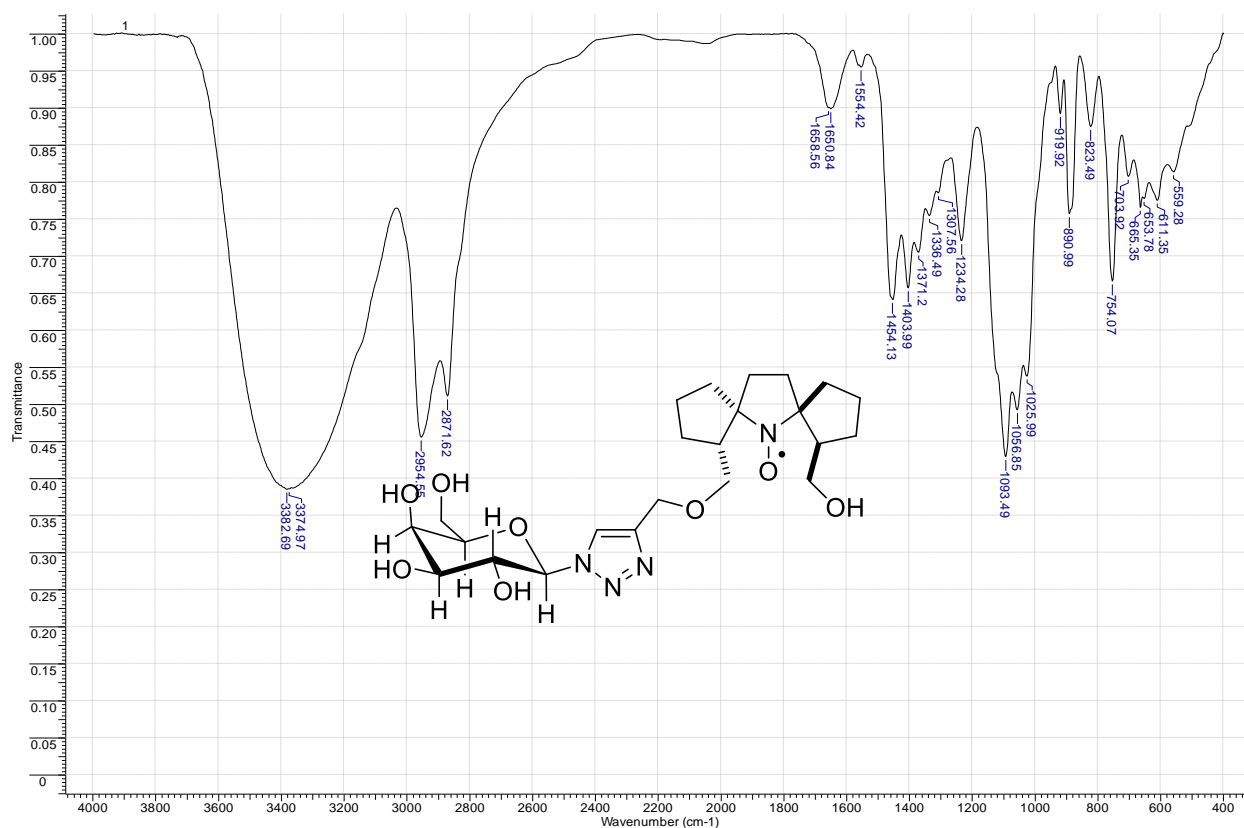

**Fig. S20.** IR spectrum of (1R(S),5R(S),7R(S),8R(S))-1-(Hydroxymethyl)-8-((1-[β-D-galactopyranosyl]-1H-1,2,3-triazol-4-yl)methoxy)methyl)-6-azadispiro[4.1.4.2]tridecane-6-oxyl (33) (KBr)



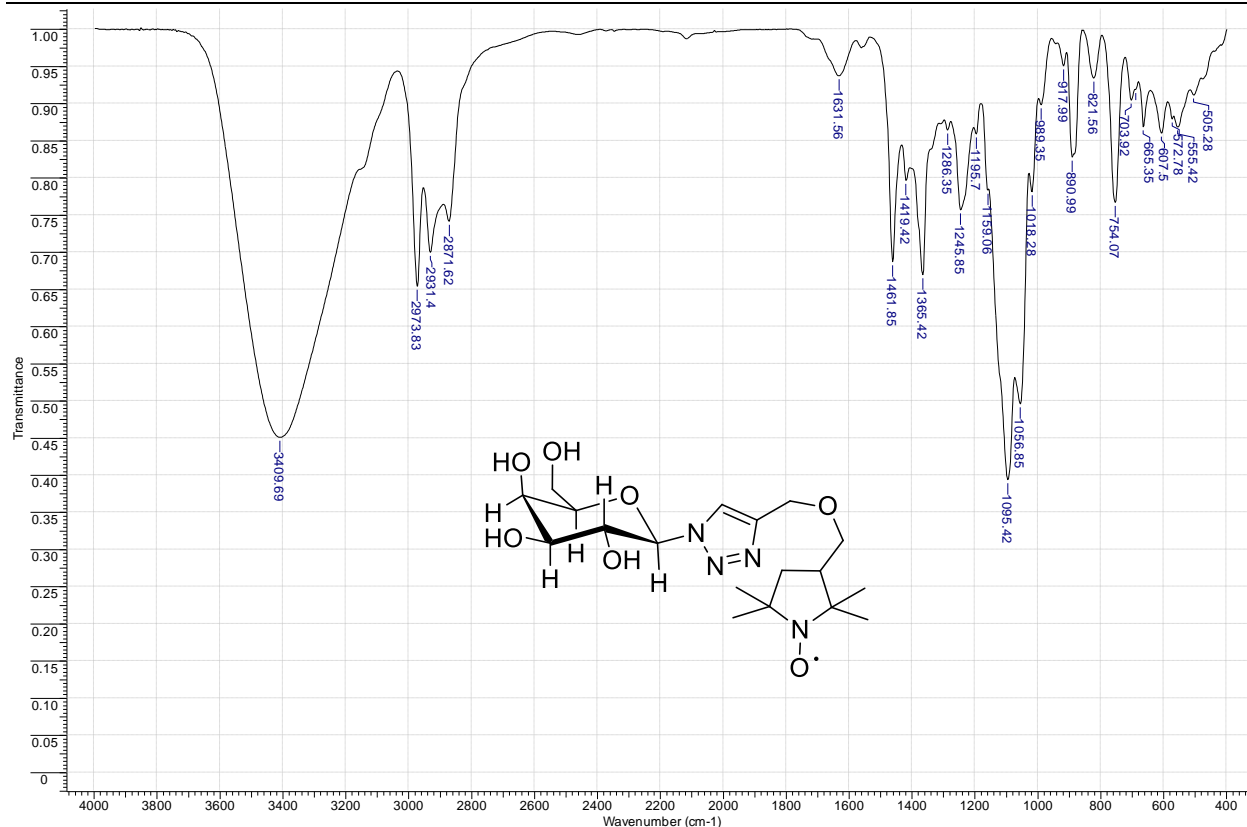

**Fig. S21.** IR spectrum of 2,2,5,5-Tetramethyl-3-(((1-(β-D-galactopyranosyl)-1H-1,2,3-triazol-4-yl)methoxy)methyl)pyrrolidine-1-oxyl (35) (KBr)

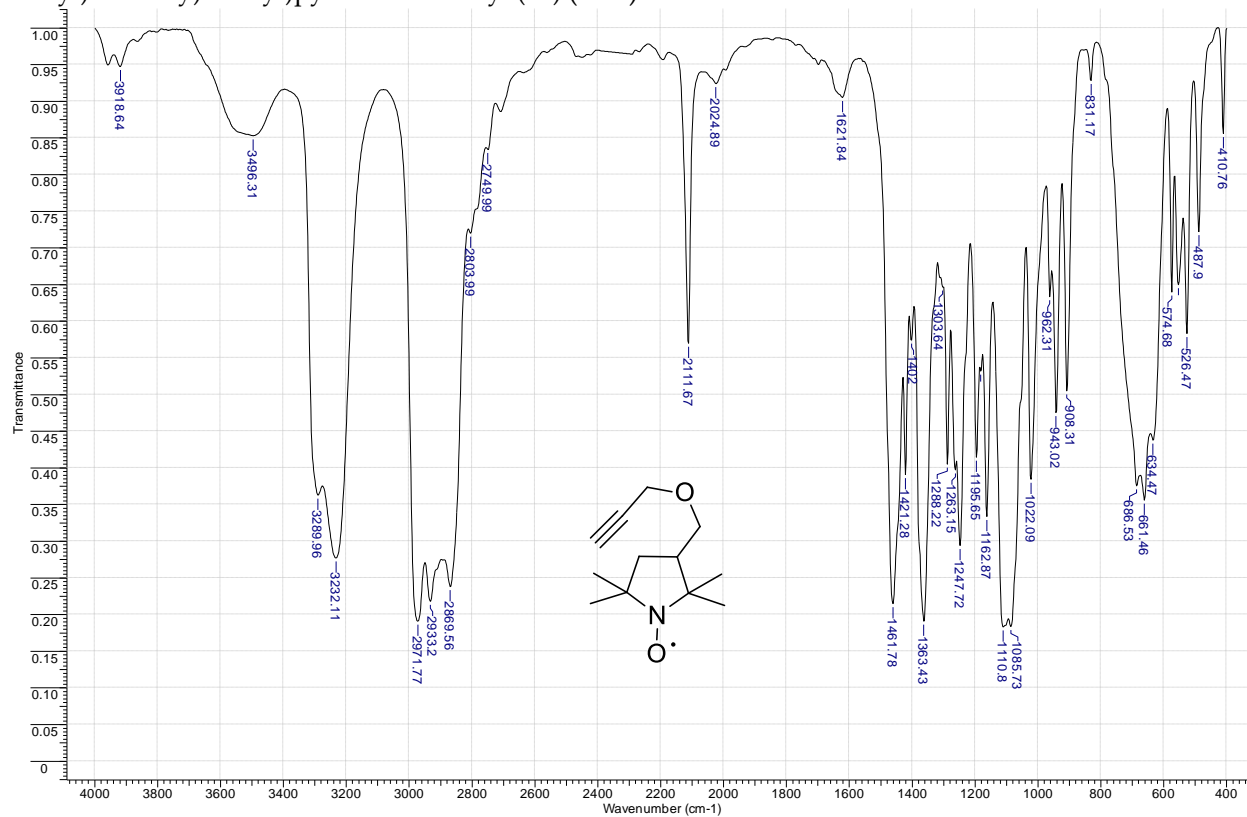

**Fig. S22.** IR spectrum of 2,2,5,5-Tetramethyl-3-((prop-2-ynyloxy)methyl)pyrrolidine-1-oxyl (37) (KBr)

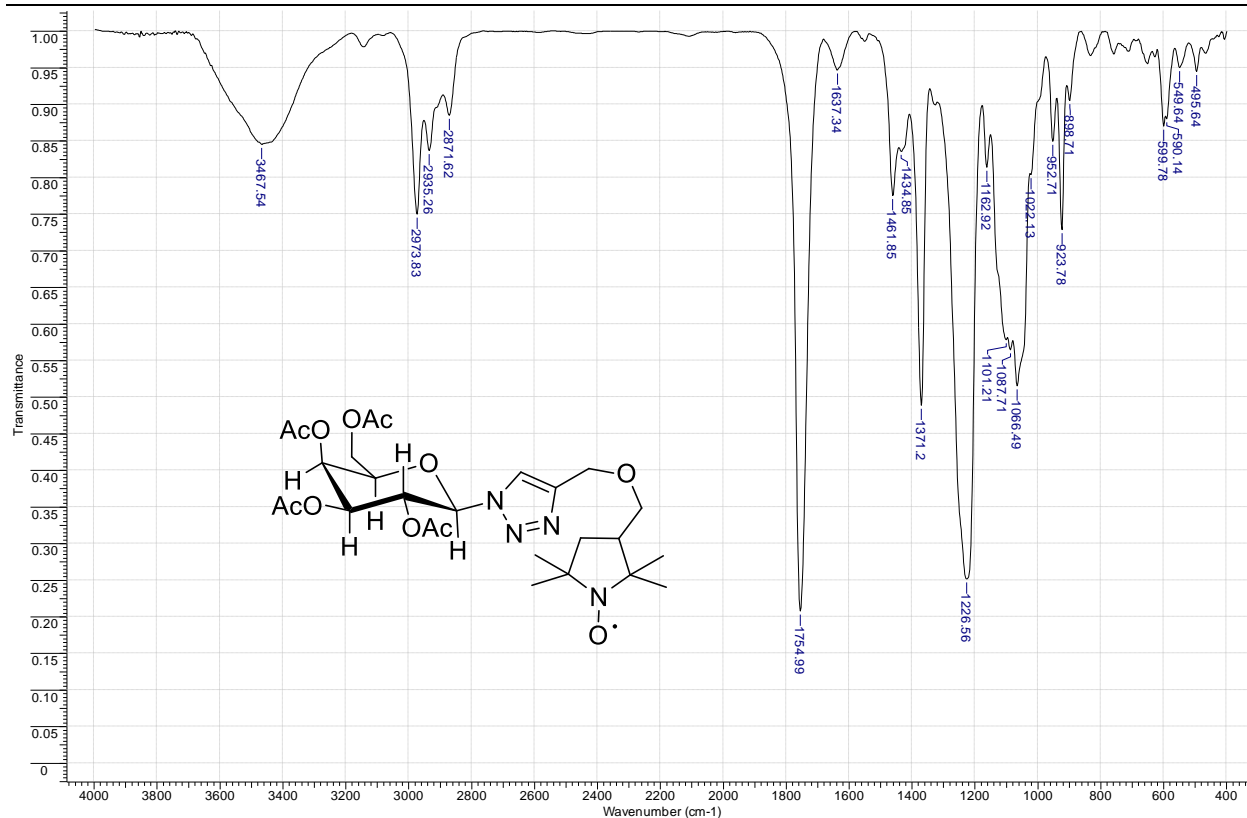

**Fig. S23.** IR spectrum of 2,2,5,5-Tetramethyl-3-(((1-(2,3,4,6-tetra-O-acetyl-β-D-galactopyranosyl)-1H-1,2,3-triazol-4-yl)methoxy)methyl)pyrrolidine-1-oxyl (**38**) (KBr)

### 3. UV spectral data

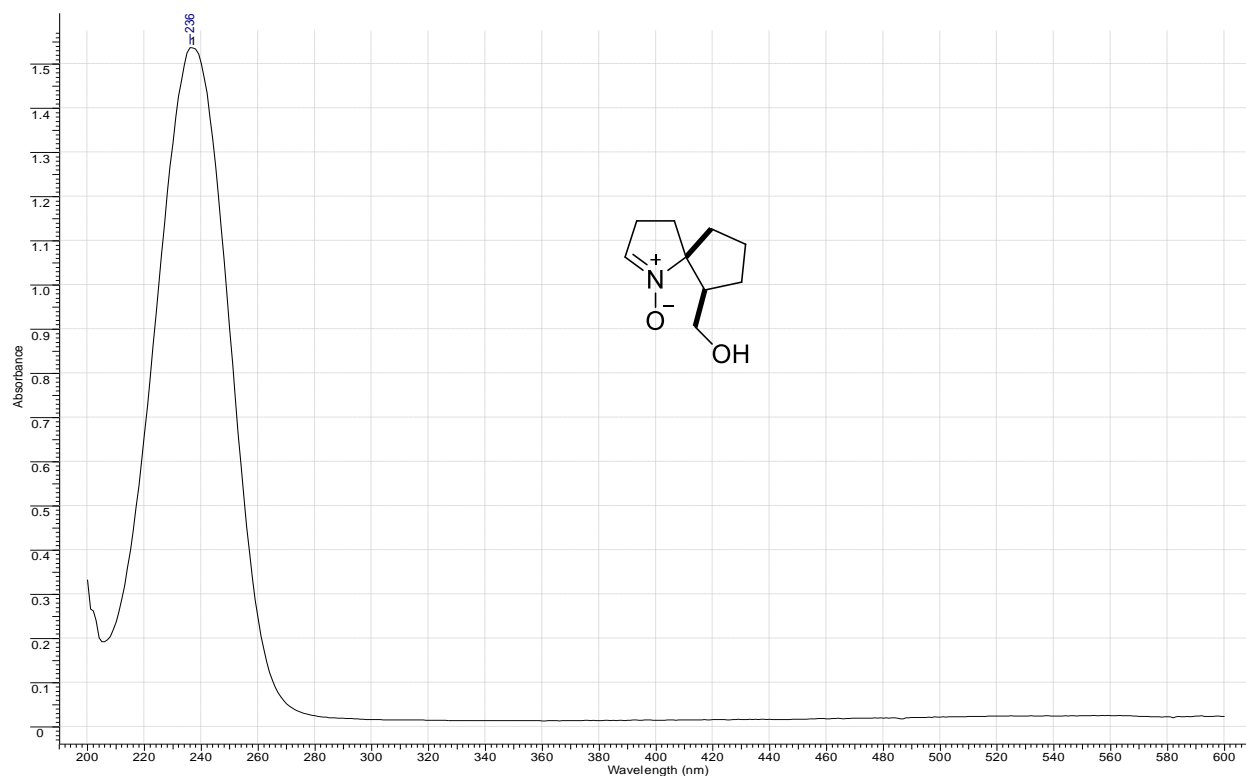

**Fig. S24.** UV spectrum of [(5*R*(*S*),6*R*(*S*))-1-Oxido-1-azaspiro[4.4]non-1-en-6-yl]methanol (**9**) in EtOH (0.429mg/25ml, L=2cm)

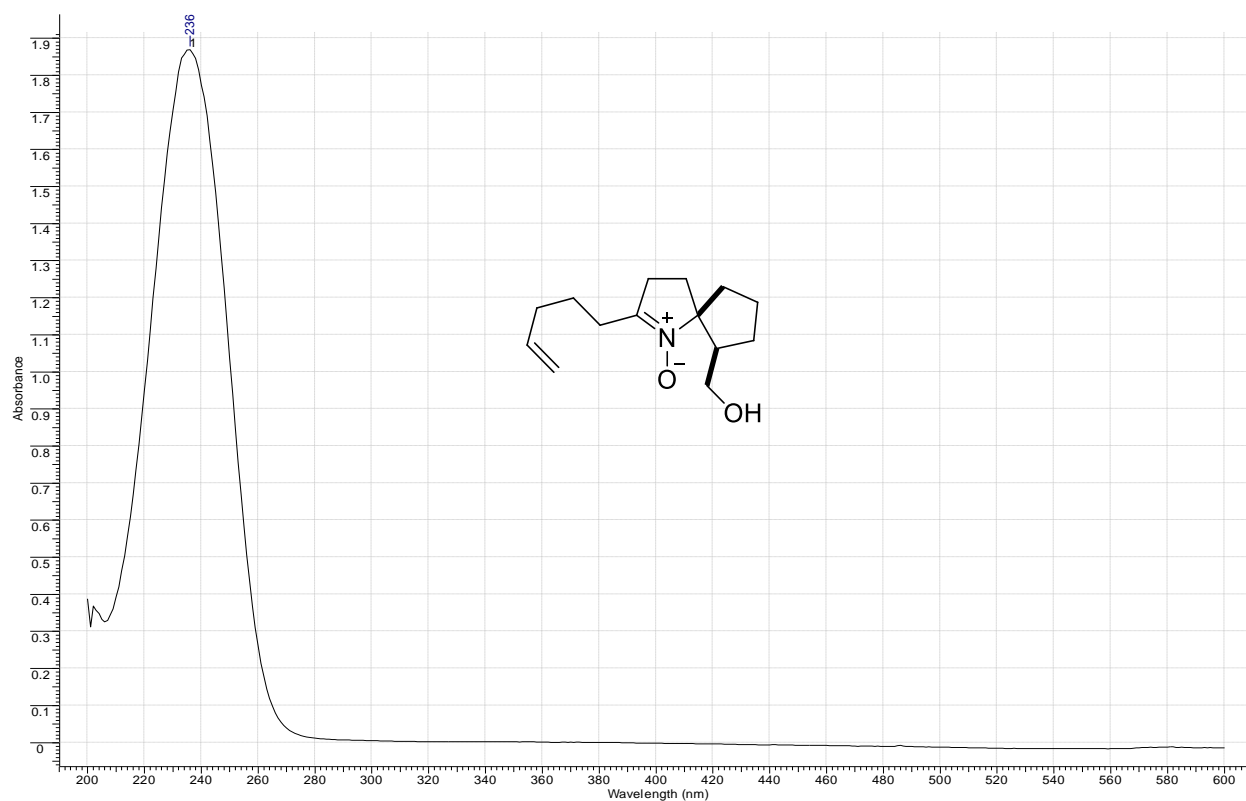

**Fig. S25.** UV spectrum of [(5*R*(*S*),6*R*(*S*))-1-Oxido-2-pent-4-en-1-yl-1-azaspiro[4.4]non-1-en-6-yl]methanol (**12**) in EtOH (0.596mg/25ml, L=2cm)

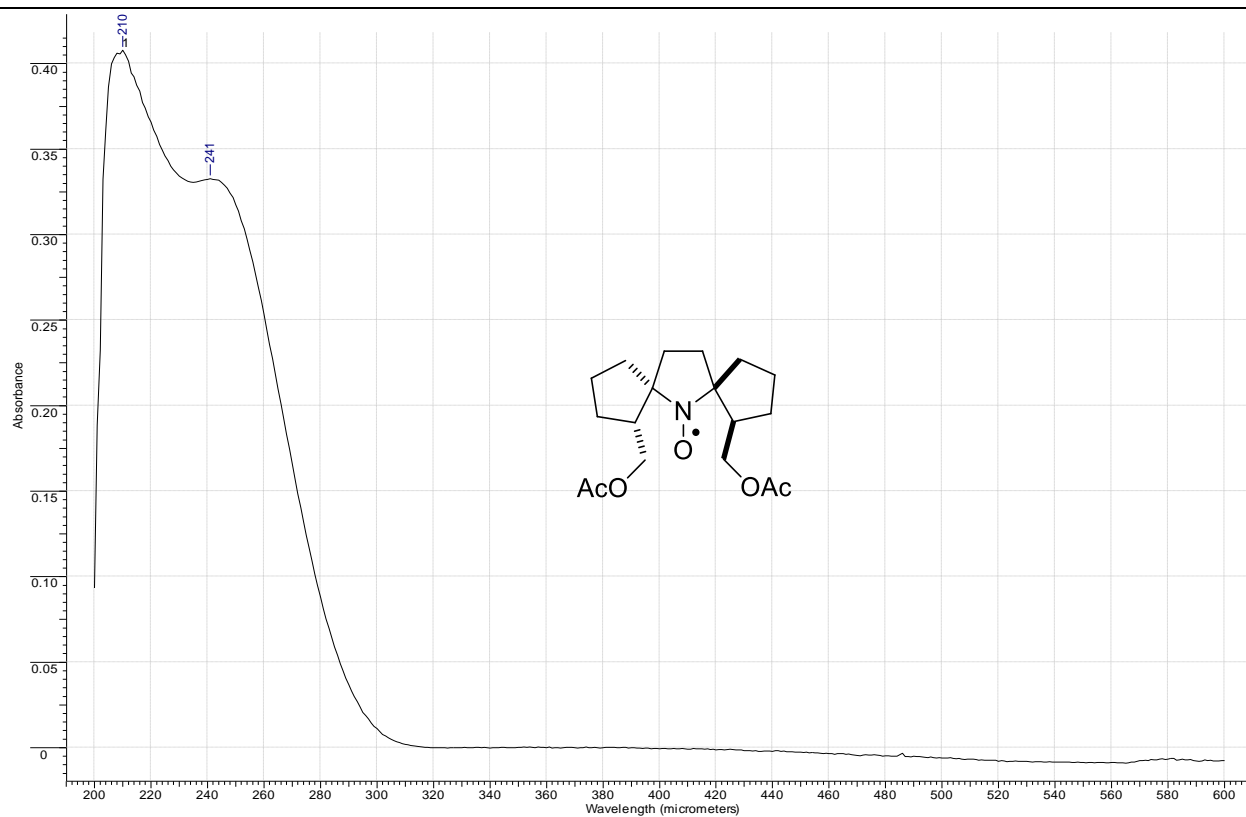

**Fig. S26.** UV spectrum of (1*R*(*S*),5*S*(*R*),7*R*(*S*),8*R*(*S*))-1,8-Bis[(acetyloxy)methyl]-6-azadispiro[4.1.4.2]tridecane-6-oxyl (**17**) in EtOH (0.848mg/25ml, L=2cm)

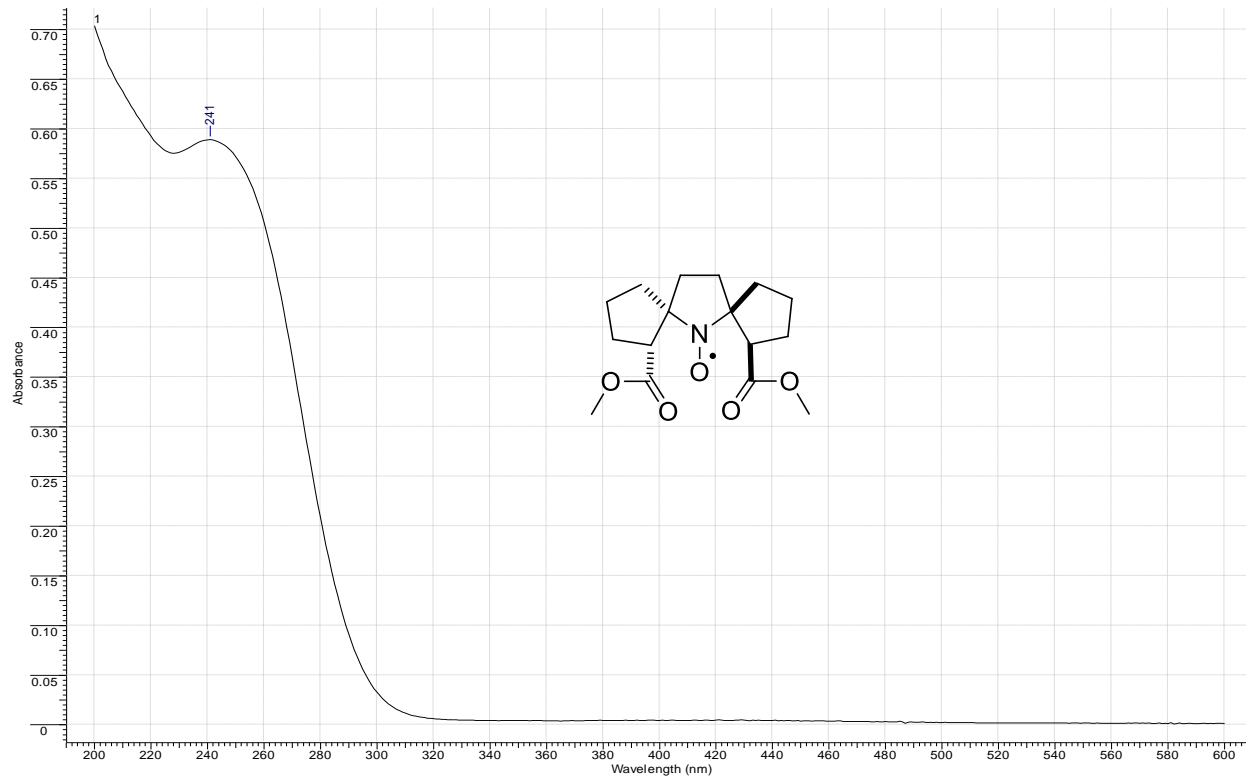

**Fig. S27.** UV spectrum of (1*R*(*S*),5*R*(*S*),7*R*(*S*),8*R*(*S*))-1,8-Bis[Methoxycarbonyl]-6-azadispiro[4.1.4.2]tridecane-6-oxyl (**22**) in EtOH (4.985mg/25ml, L=0.5cm)

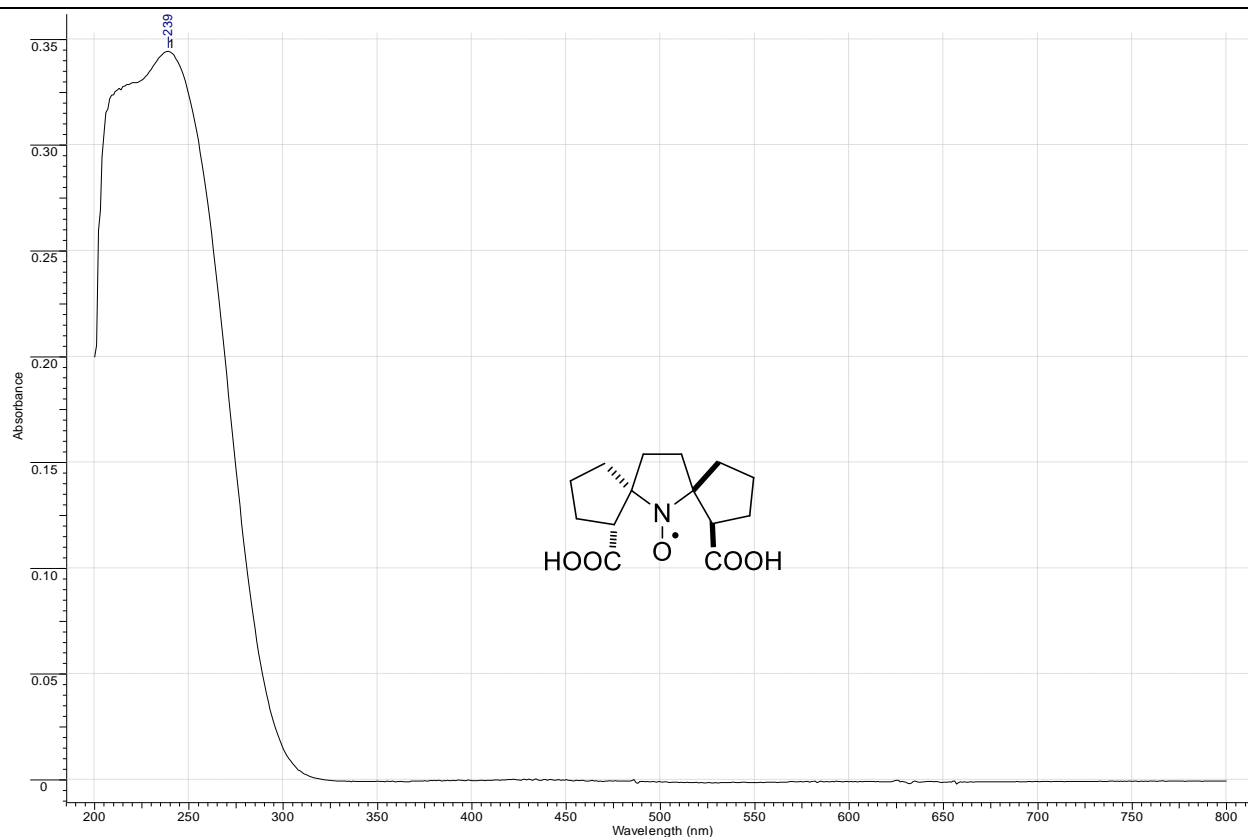

**Fig. S28.** UV spectrum of 1*R*(*S*),5*R*(*S*),7*R*(*S*),8*R*(*S*))-1,8-Dicarboxy-6-azadispiro[4.1.4.2]tridecane-6-oxyl (**23a**) in EtOH (0.708mg/25ml, L=2cm)

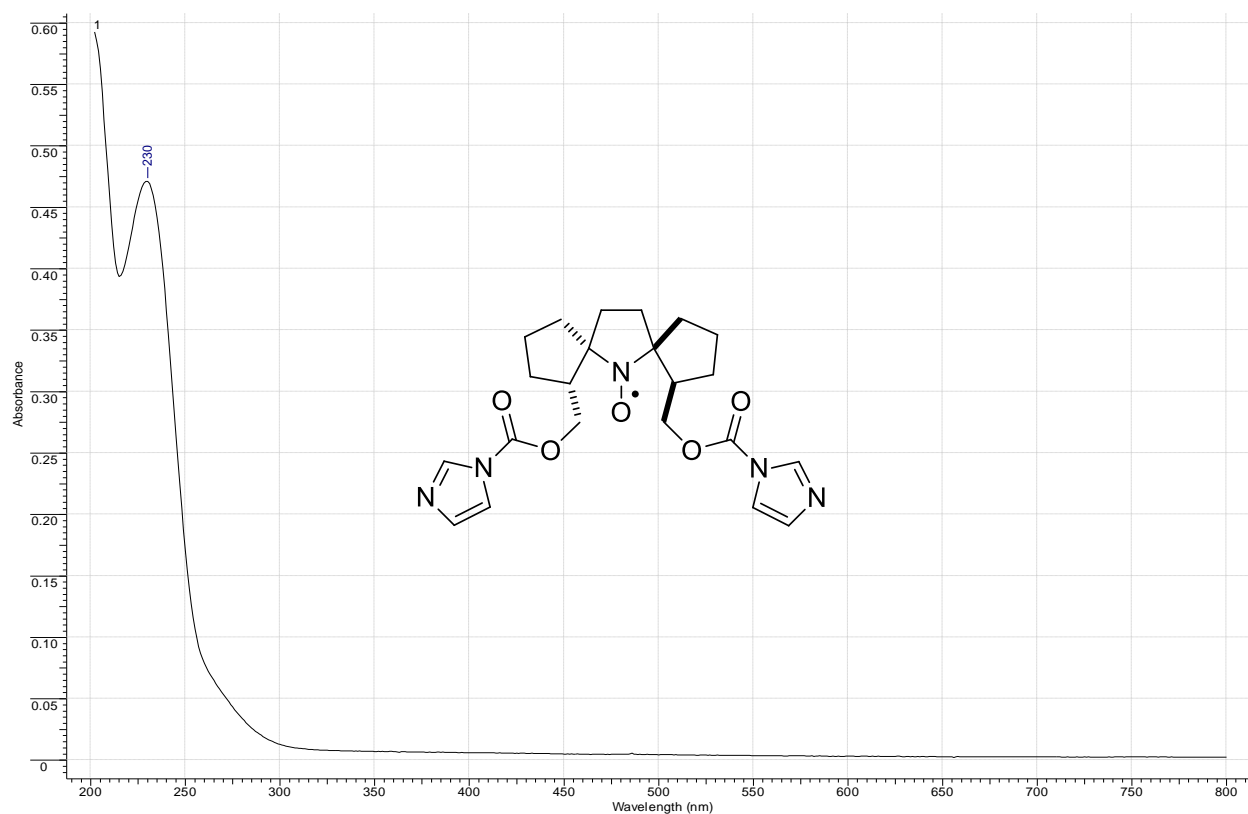

**Fig. S29.** UV spectrum of (1*R*(*S*),5*R*(*S*),7*R*(*S*),8*R*(*S*))-1,8-Bis[(1*H*-imidazol-1-ylcarbonyl)oxy)methyl]-6-azadispiro[4.1.4.2]tridecane-6-oxyl (**26**) in EtOH (1.150mg/25ml, L=0.5cm)

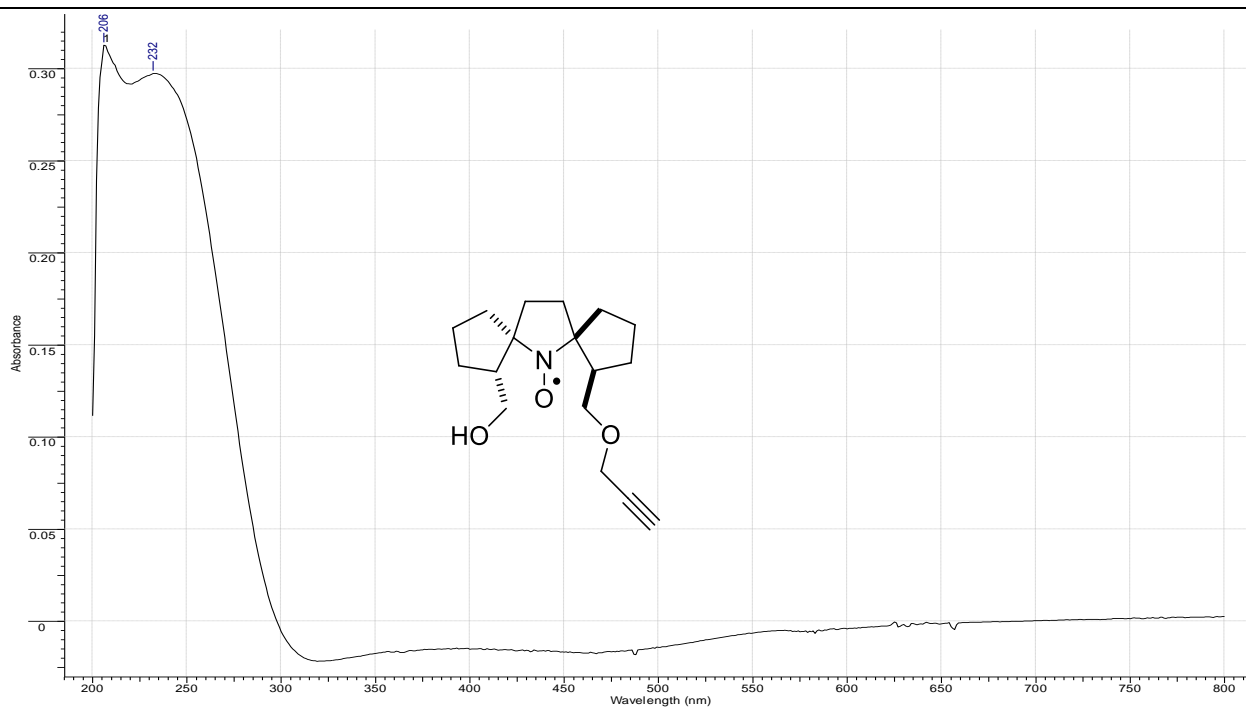

**Fig. S30.** UV spectrum of (1R(S),5R(S),7R(S),8R(S))-1-(Hydroxymethyl)-8-[(prop-2-yn-1-yloxy)methyl]-6-azadispiro[4.1.4.2]tridecane-6-oxyl (**31**) in EtOH (0.740mg/25ml, L=2cm)



#### 4. $^1\text{H}$ and $^{13}\text{C}$ NMR spectral data

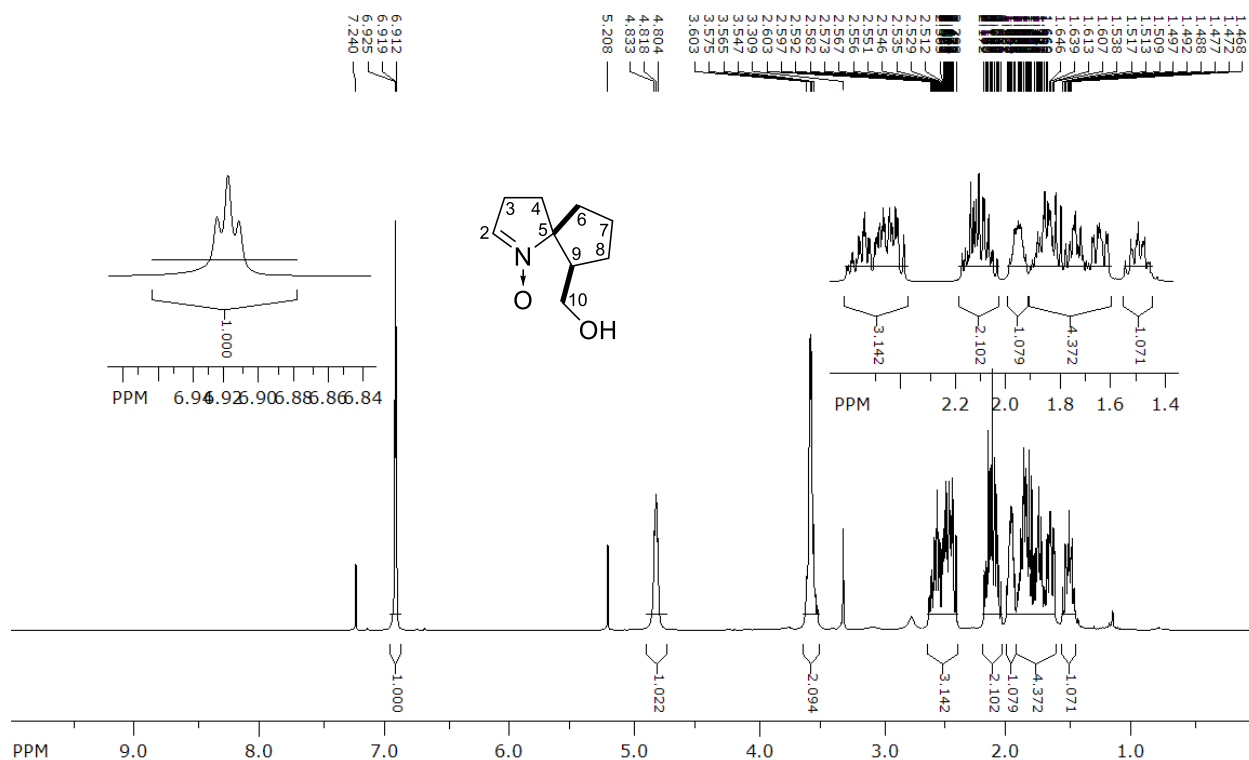

**Fig. S31.**  $^1\text{H}$  NMR spectrum of [(5*R*(*S*),6*R*(*S*))-1-Oxido-1-azaspiro[4.4]non-1-en-6-yl]methanol (**9**) in  $\text{CDCl}_3$  at 400 MHz

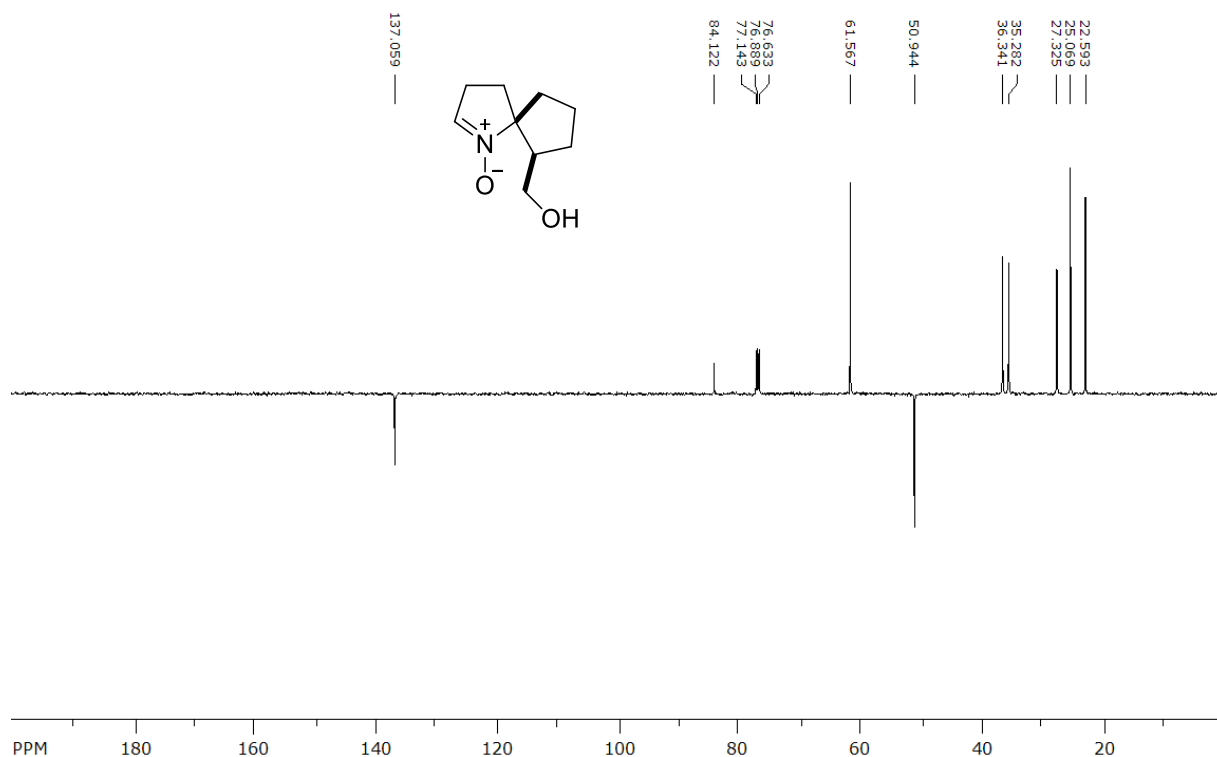

**Fig. S32.**  $^{13}\text{C}$  NMR spectrum of [(5*R*(*S*),6*R*(*S*))-1-Oxido-1-azaspiro[4.4]non-1-en-6-yl]methanol (**9**) in  $\text{CDCl}_3$  at 125 MHz

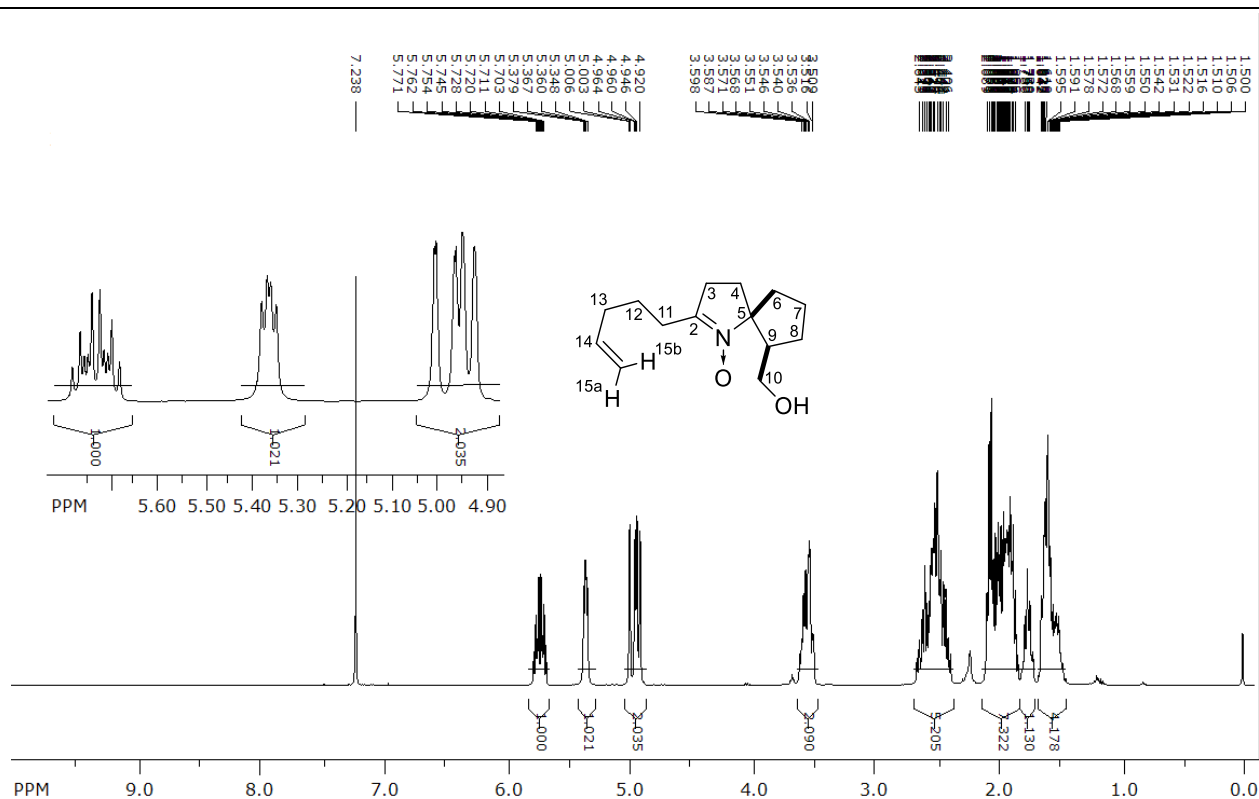

**Fig. S33.**  $^1\text{H}$  NMR spectrum of [(5*R*(*S*),6*R*(*S*))-1-Oxido-2-(pent-4-en-1-yl)-1-azaspiro[4.4]non-1-en-6-yl]methanol (**12**) in  $\text{CDCl}_3$  at 400 MHz

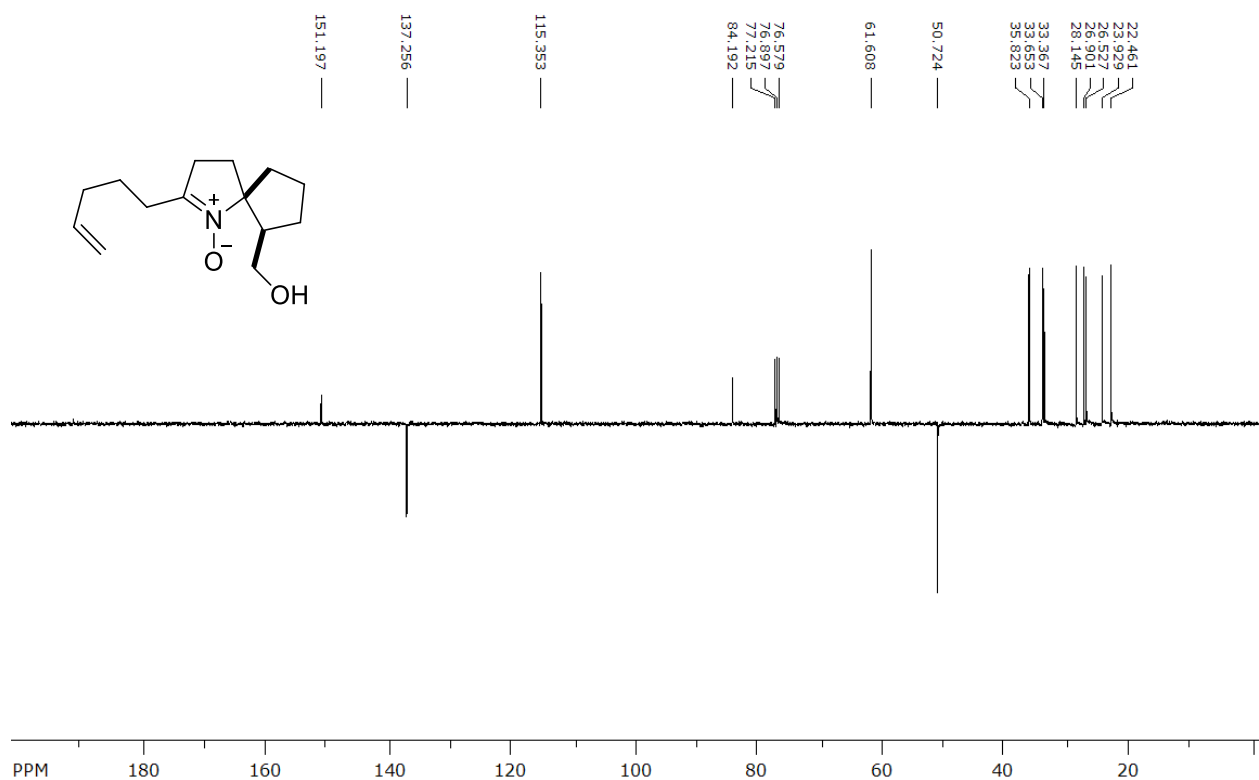

**Fig. S34.**  $^{13}\text{C}$  NMR spectrum of [(5*R*(*S*),6*R*(*S*))-1-Oxido-2-(pent-4-en-1-yl)-1-azaspiro[4.4]non-1-en-6-yl]methanol (**12**) in  $\text{CDCl}_3$  at 100 MHz

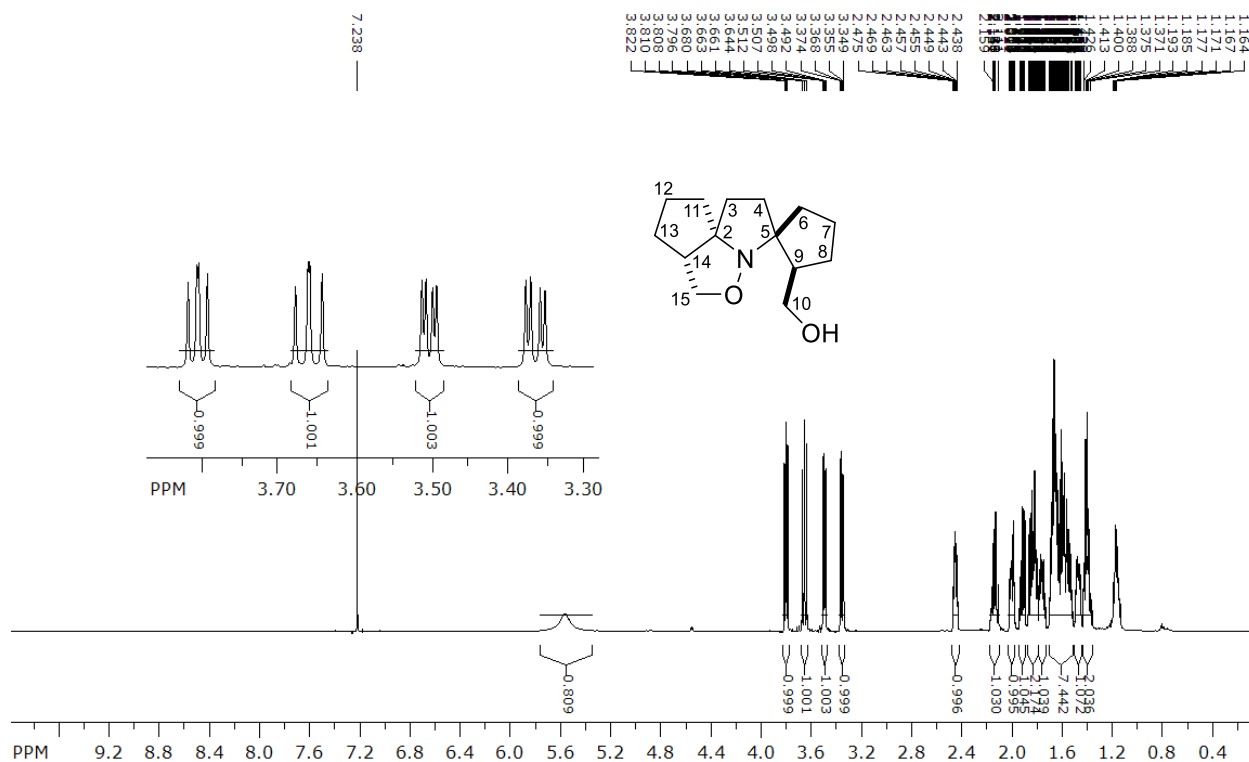

**Fig. S35.** <sup>1</sup>H NMR spectrum of (1*R*(*S*),2*R*(*S*),6*a'**R*(*S*),9*a'**R*(*S*)-Hexahydro-6'*H*-spiro[cyclopentan-1,3'-cyclopenta[*c*]pyrrolo[1,2-*b*]isoxazol]-2-ylmethanol (**13**) in CDCl<sub>3</sub> at 600 MHz

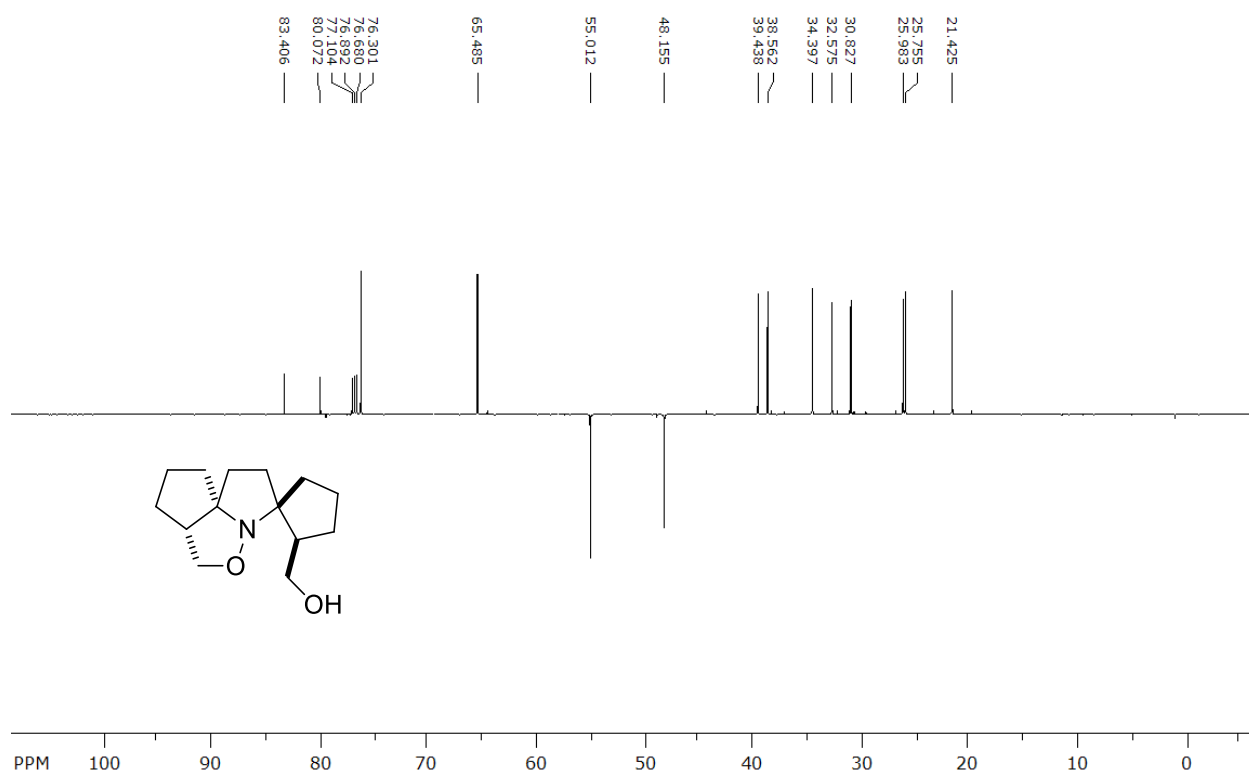

**Fig. S36.** <sup>13</sup>C NMR spectrum of (1*R*(*S*),2*R*(*S*),6*a'**R*(*S*),9*a'**R*(*S*)-Hexahydro-6'*H*-spiro[cyclopentan-1,3'-cyclopenta[*c*]pyrrolo[1,2-*b*]isoxazol]-2-ylmethanol (**13**) in CDCl<sub>3</sub> at 150 MHz

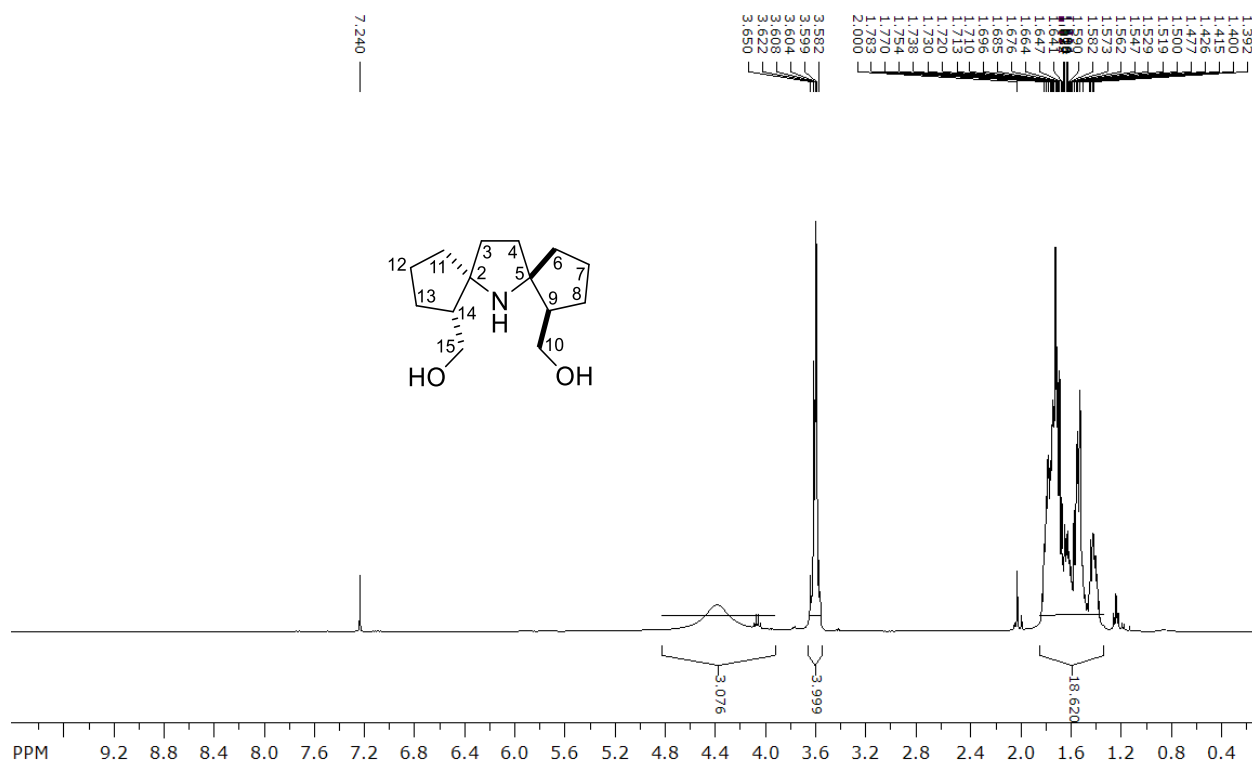

**Fig. S37.** <sup>1</sup>H NMR spectrum of (1R(S),5R(S),7R(S),8R(S))-6-azadispiro[4.1.4.2]tridecan-1,8-diyldimethanol (**14**) in CDCl<sub>3</sub> at 400 MHz

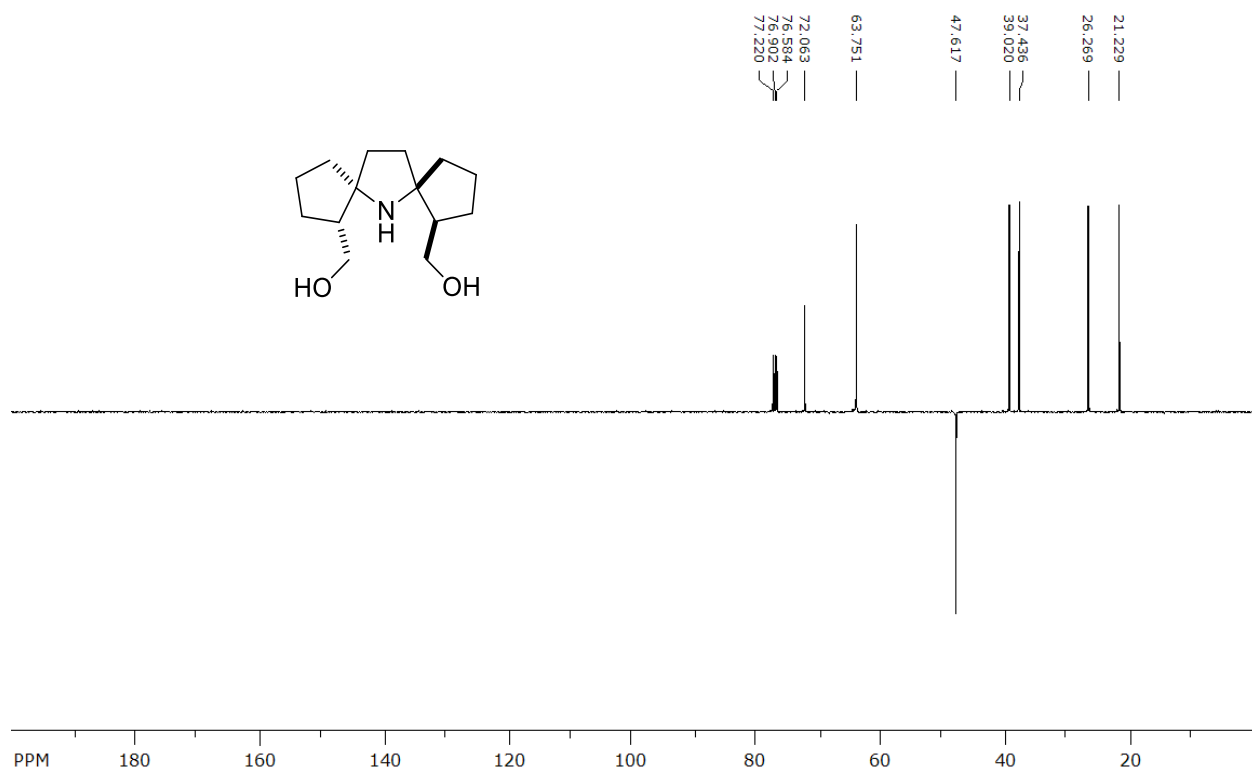

**Fig. S38.** <sup>13</sup>C NMR spectrum of (1R(S),5R(S),7R(S),8R(S))-6-azadispiro[4.1.4.2]tridecan-1,8-diyldimethanol (**14**) in CDCl<sub>3</sub> at 100 MHz

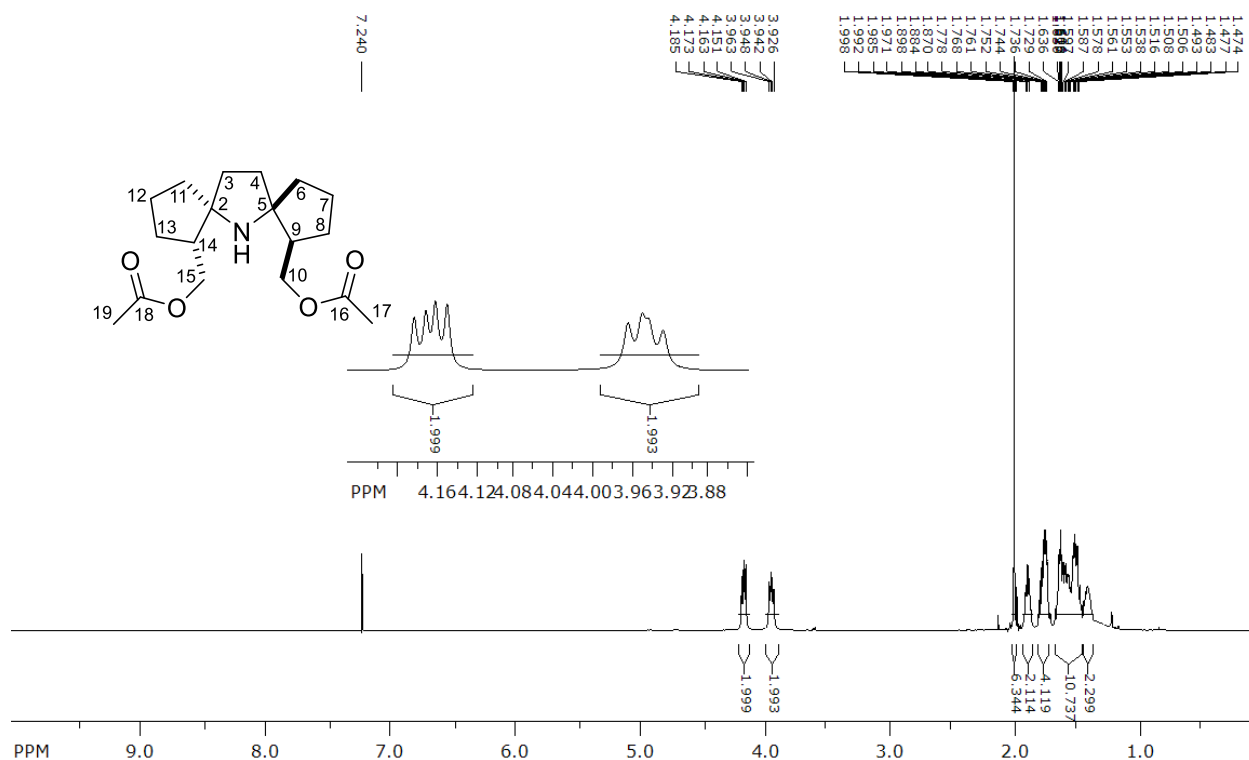

**Fig. S39.** <sup>1</sup>H NMR spectrum of (1R(S),5R(S),7R(S),8R(S))-6-azadispiro[4.1.4.2]tridecan-1,8-diyl di(methylene) diacetate (**16**) in CDCl<sub>3</sub> at 500 MHz

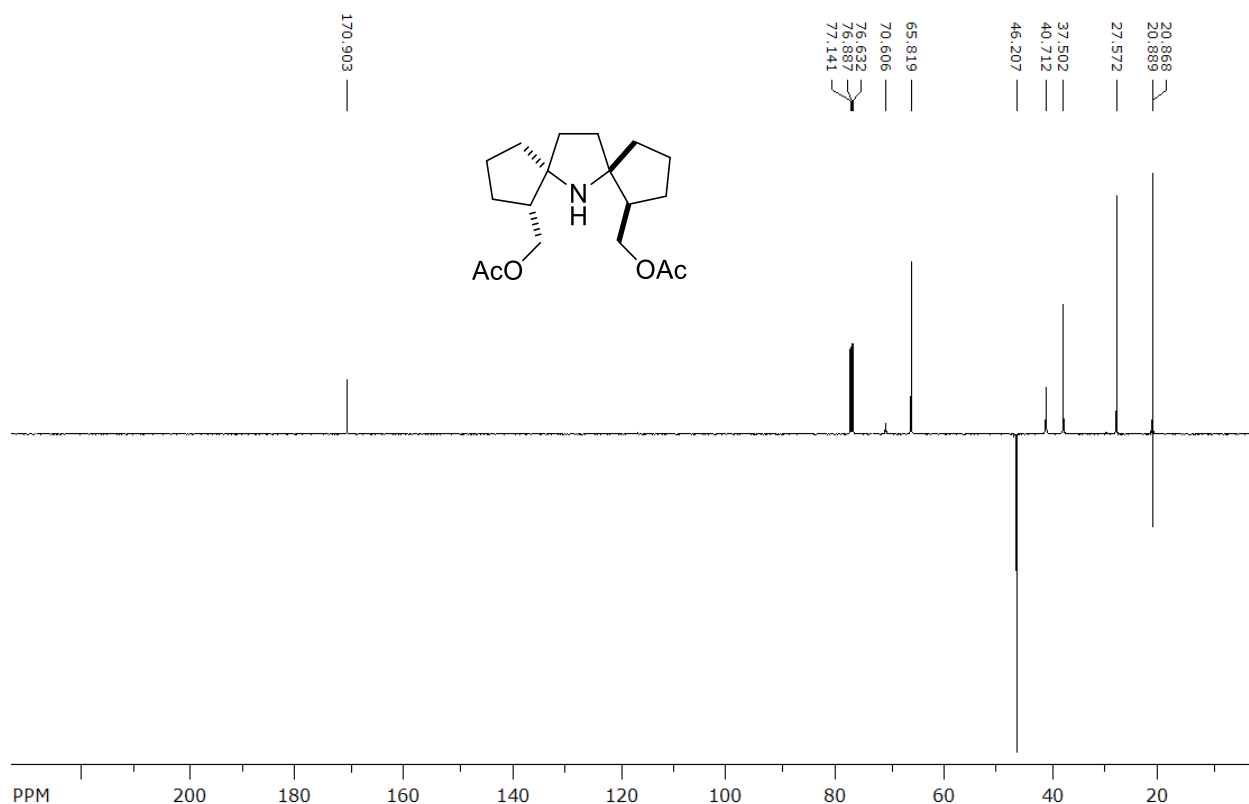

**Fig. S40.** <sup>13</sup>C NMR spectrum of (1R(S),5R(S),7R(S),8R(S))-6-azadispiro[4.1.4.2]tridecan-1,8-diyl di(methylene) diacetate (**16**) in CDCl<sub>3</sub> at 125 MHz

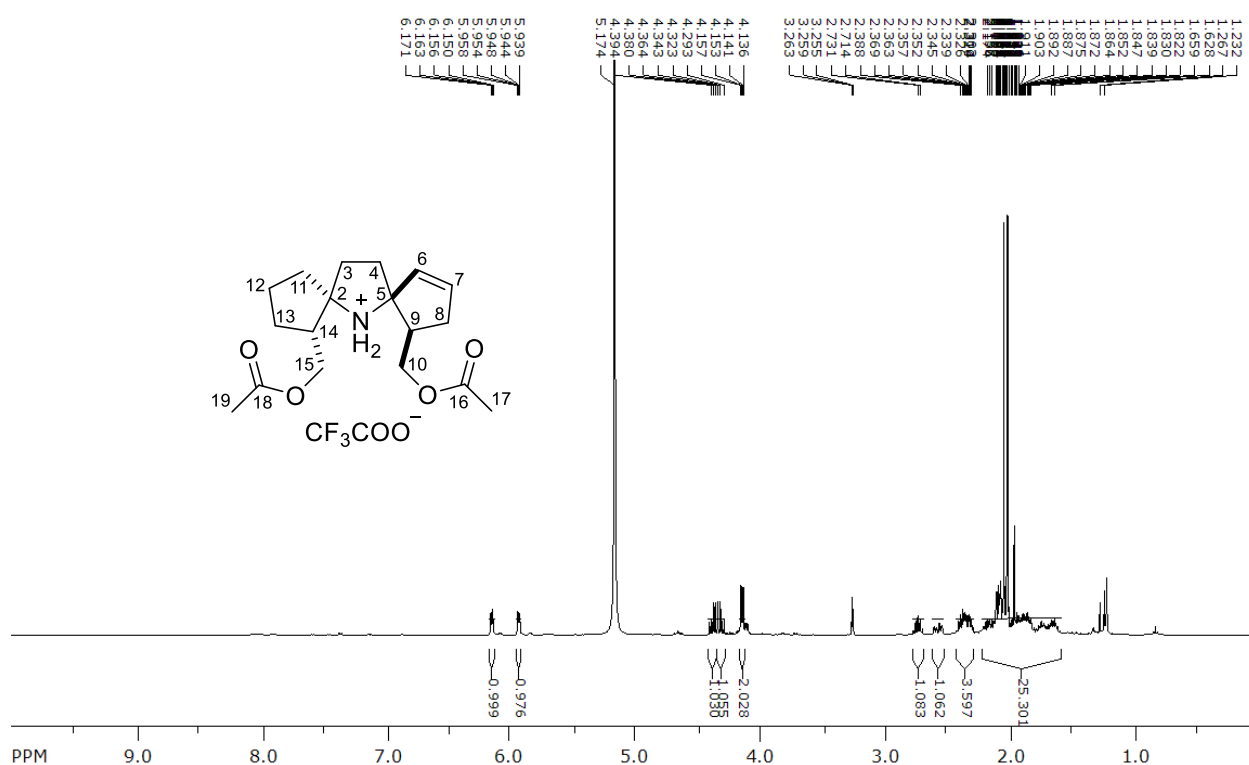

**Fig. S41.** <sup>1</sup>H NMR spectrum of (4*R*(S),5*S*(R),7*R*(S),8*R*(S))-4,8-Bis[(acetyloxy)methyl]-6-azoniadispiro[4.1.4.2]tridec-1-ene trifluoroacetate (**19**) in CD<sub>3</sub>OD+CF<sub>3</sub>COOH at 400 MHz

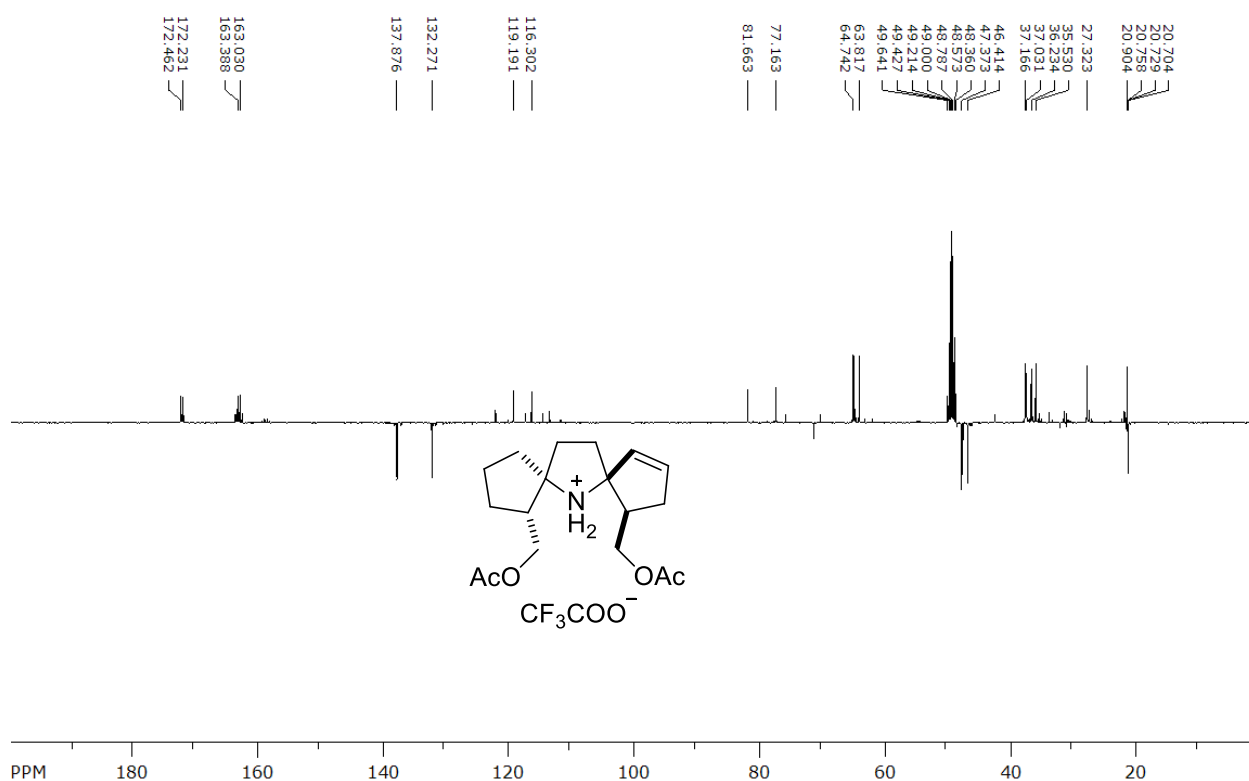

**Fig. S42.** <sup>13</sup>C NMR spectrum of (4*R*(S),5*S*(R),7*R*(S),8*R*(S))-4,8-Bis[(acetyloxy)methyl]-6-azoniadispiro[4.1.4.2]tridec-1-ene trifluoroacetate (**19**) in CD<sub>3</sub>OD+CF<sub>3</sub>COOH at 100 MHz



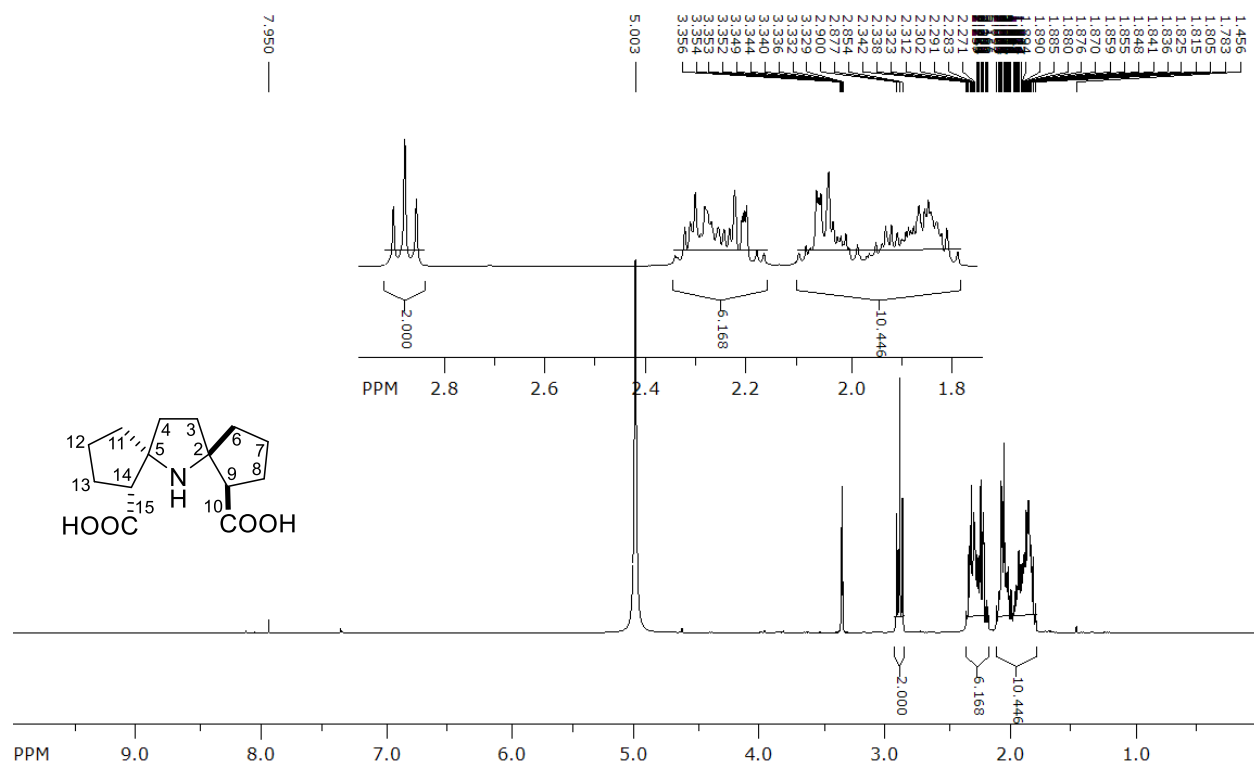

**Fig. S43.** <sup>1</sup>H NMR spectrum of (1R(S),5R(S),7R(S),8R(S))-6-Azadisporo[4.1.4.2]tridecan-1,8-dicarboxylic acid (20) in CD<sub>3</sub>OD at 400 MHz

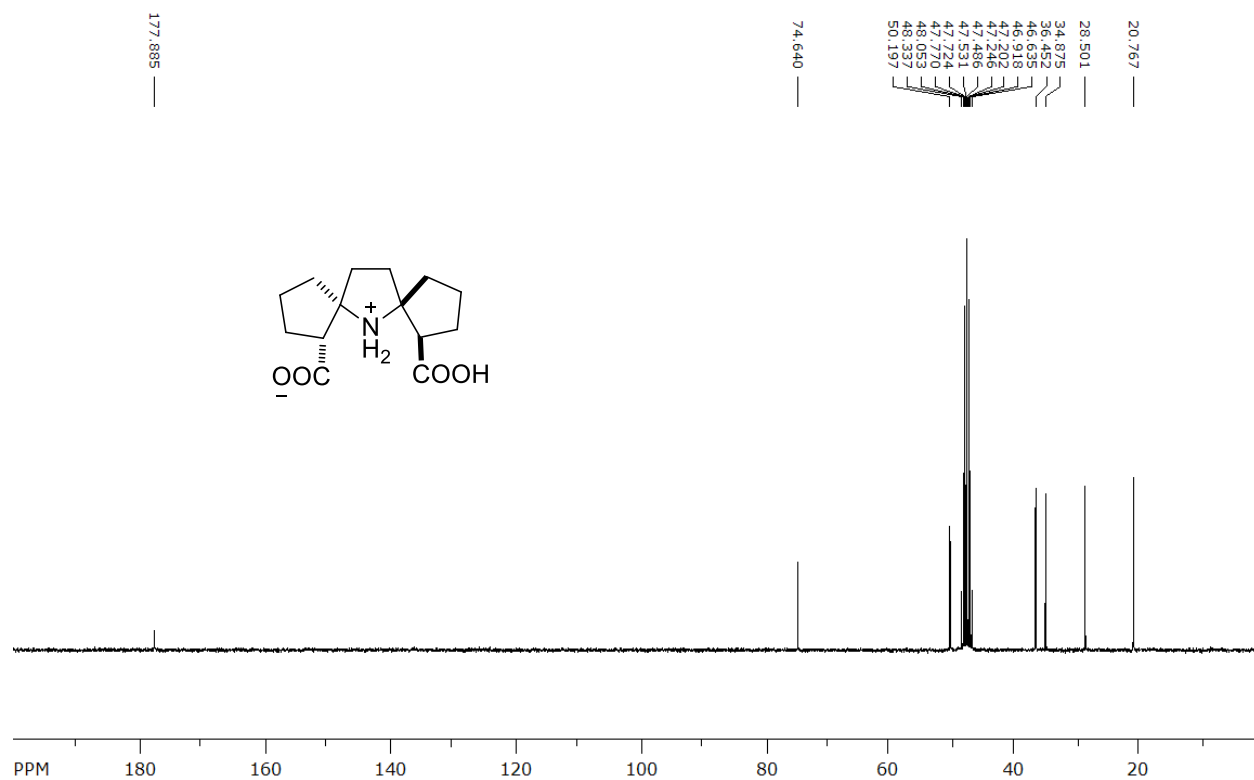

**Fig. S44.** <sup>1</sup>H NMR spectrum of (1R(S),5R(S),7R(S),8R(S))-6-Azadisporo[4.1.4.2]tridecan-1,8-dicarboxylic acid (20) in CD<sub>3</sub>OD at 75 MHz

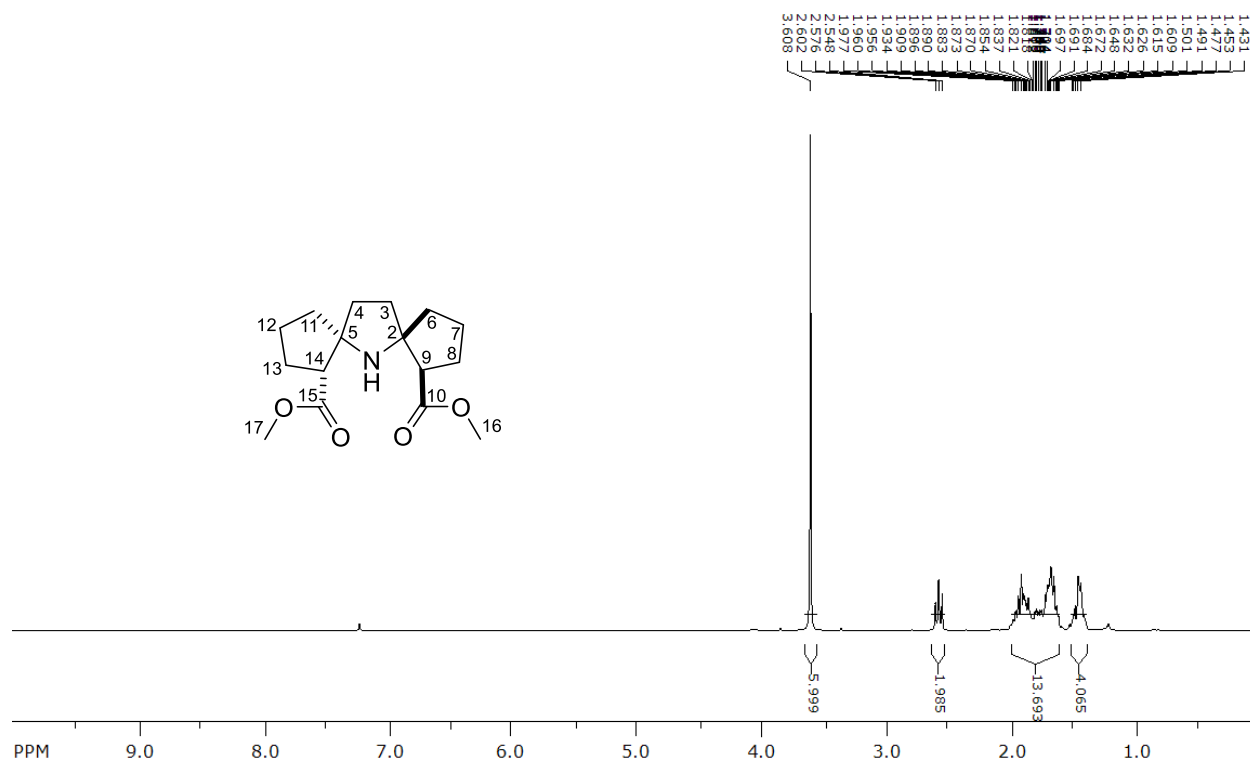

**Fig. S45.** <sup>1</sup>H NMR spectrum of Dimethyl (1*R*(*S*),5*R*(*S*),7*R*(*S*),8*R*(*S*))-6-azadispiro[4.1.4.2]tridecan-1,8-dicarboxylate (**21**) in CDCl<sub>3</sub> at 300 MHz

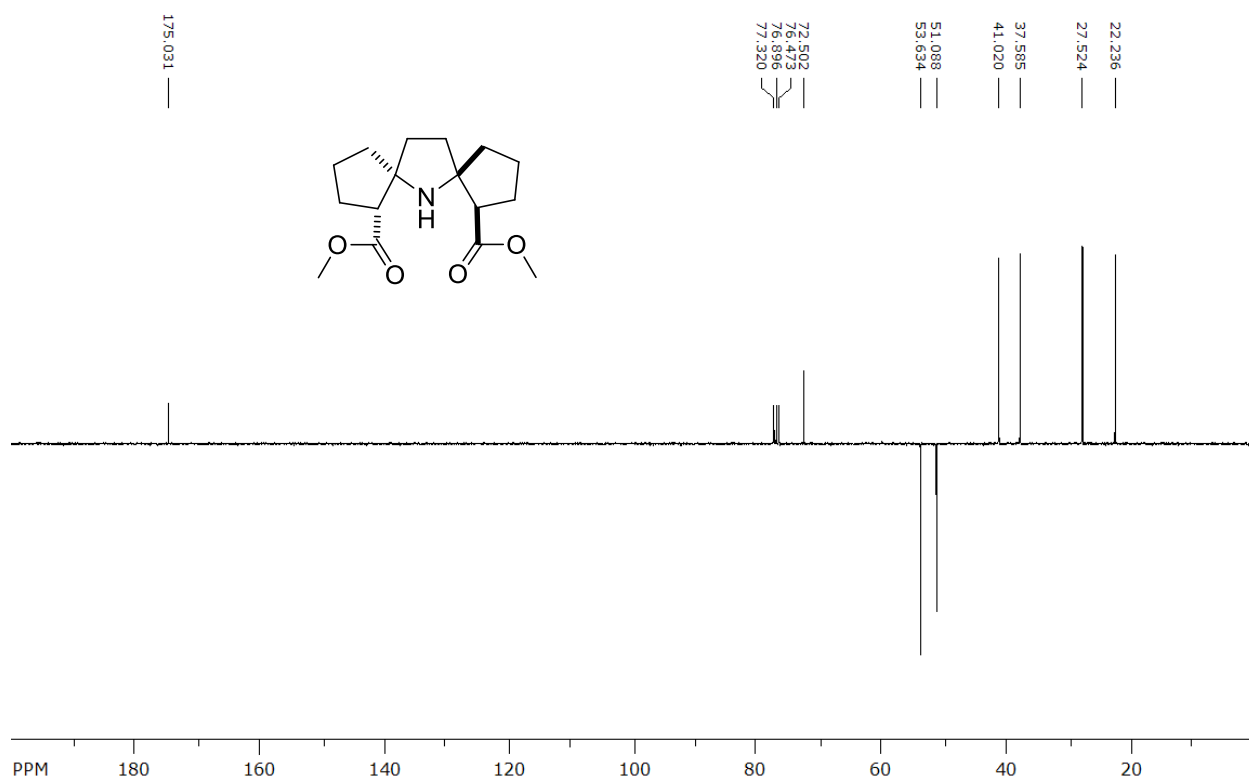

**Fig. S46.** <sup>1</sup>H NMR spectrum of Dimethyl (1*R*(*S*),5*R*(*S*),7*R*(*S*),8*R*(*S*))-6-azadispiro[4.1.4.2]tridecan-1,8-dicarboxylate (**21**) in CDCl<sub>3</sub> at 75 MHz

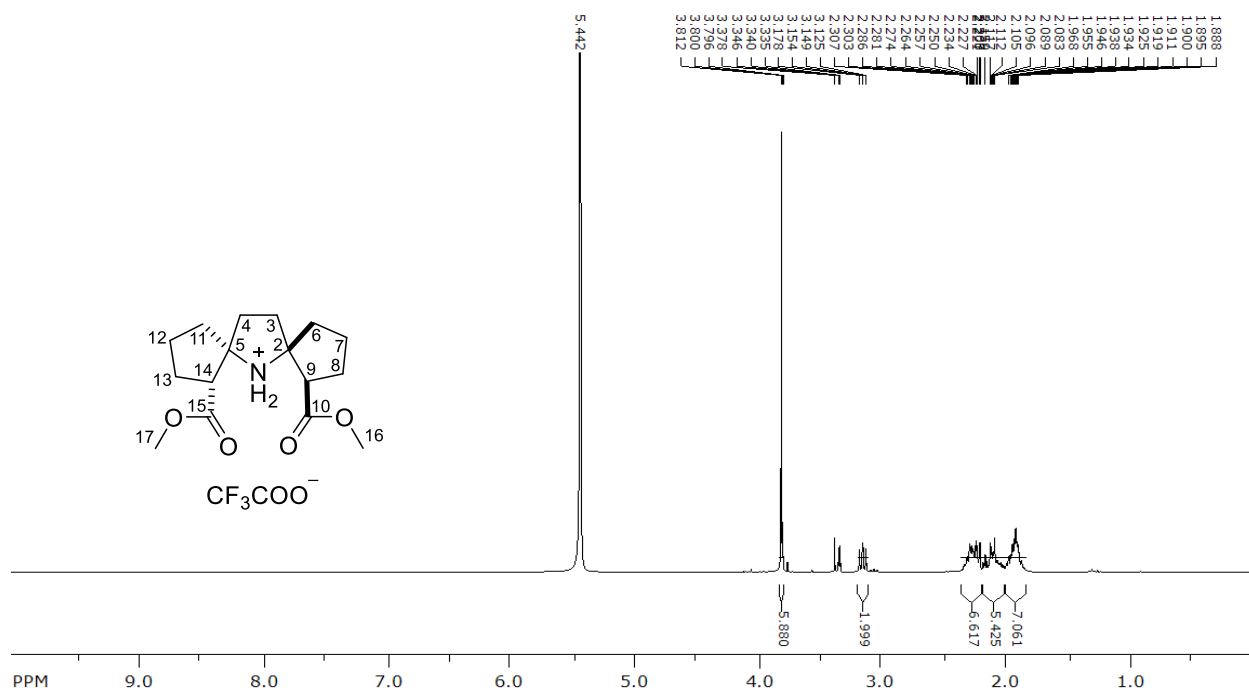

**Fig. S47.**  $^1\text{H}$  NMR spectrum of (1*R*(*S*),5*R*(*S*),7*R*(*S*),8*R*(*S*))-1,8-Bis(methoxycarbonyl)-6-azoniadispiro[4.1.4.2]tridecane trifluoroacetate (**22-red**) in  $\text{CD}_3\text{OD}+\text{CF}_3\text{COOH}$  at 300 MHz

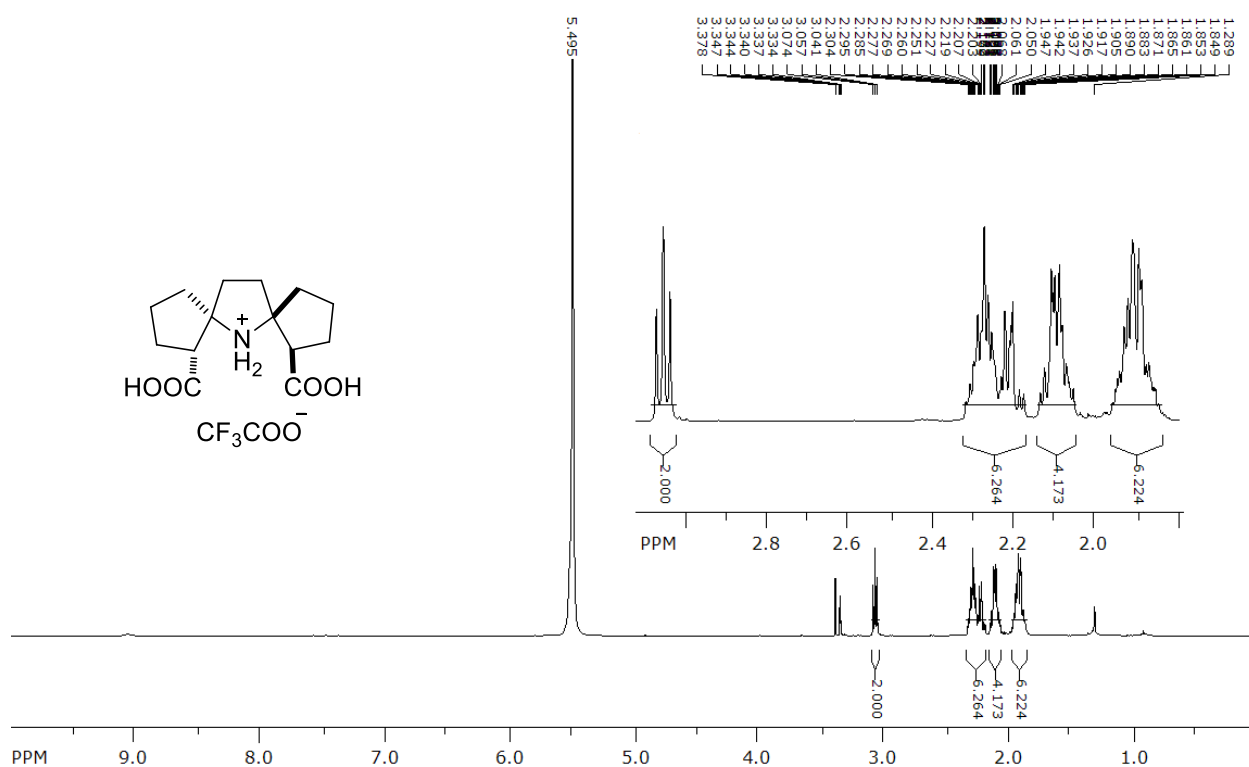

**Fig. S48.**  $^1\text{H}$  NMR spectrum of (1*R*(*S*),5*R*(*S*),7*R*(*S*),8*R*(*S*))-1,8-Dicarboxy-6-azoniadispiro[4.1.4.2]tridecane trifluoroacetate (**23a-red**) in  $\text{CD}_3\text{OD}+\text{CF}_3\text{COOH}$  at 500 MHz

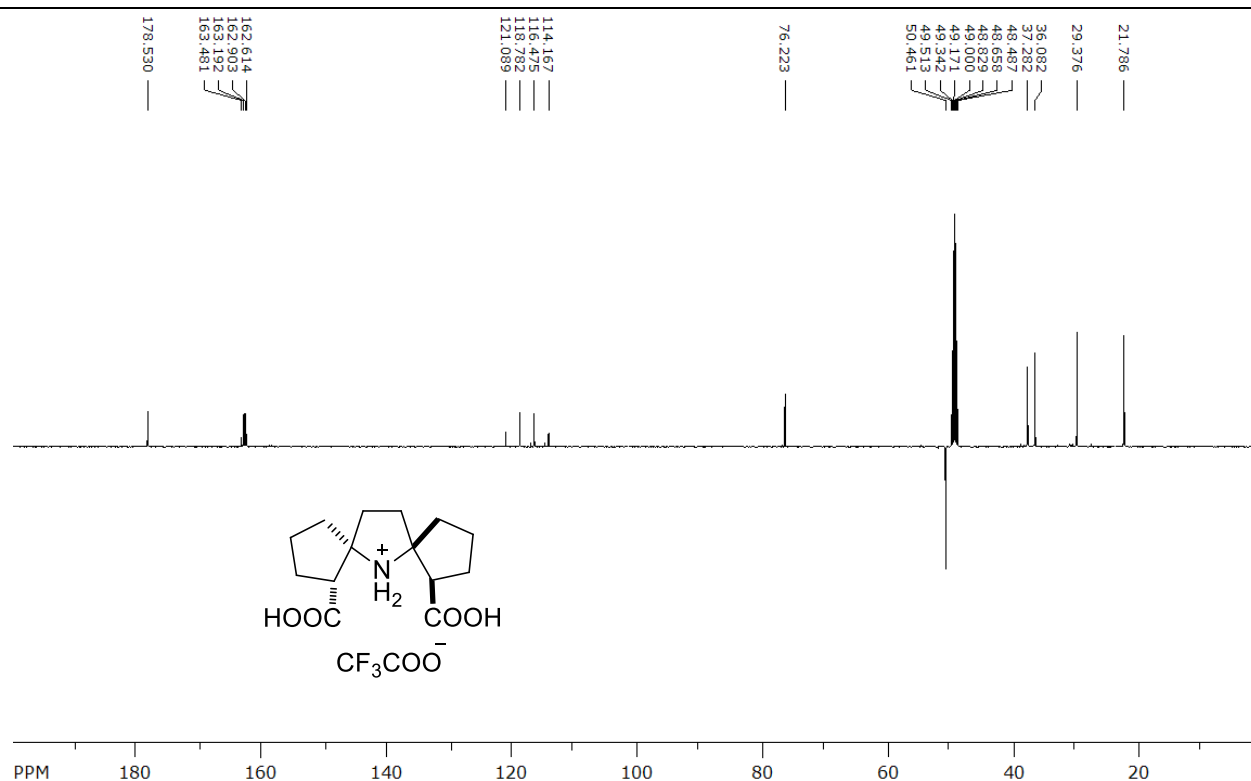

**Fig. S49.**  $^{13}\text{C}$  NMR spectrum of (1*R*(*S*),5*R*(*S*),7*R*(*S*),8*R*(*S*))-1,8-Dicarboxy-6-azoniadispiro[4.1.4.2]tridecane trifluoroacetate (**23a-red**) in  $\text{CD}_3\text{OD}+\text{CF}_3\text{COOH}$  at 125 MHz

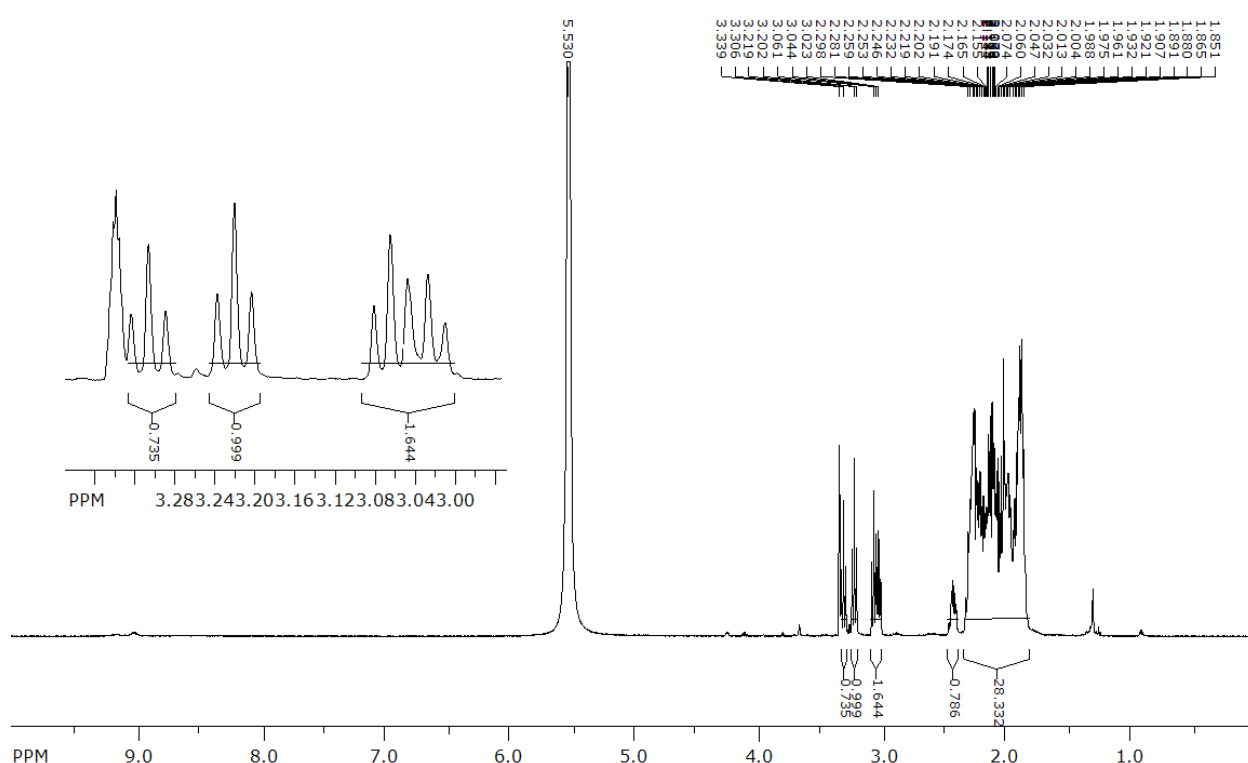

**Fig. S50.**  $^1\text{H}$  NMR spectrum of isomeric mixture of 1,8-Dicarboxy-6-azoniadispiro[4.1.4.2]tridecane trifluoroacetates (**23a+23b+23c-red**) in  $\text{CD}_3\text{OD}+\text{CF}_3\text{COOH}$  at 500 MHz

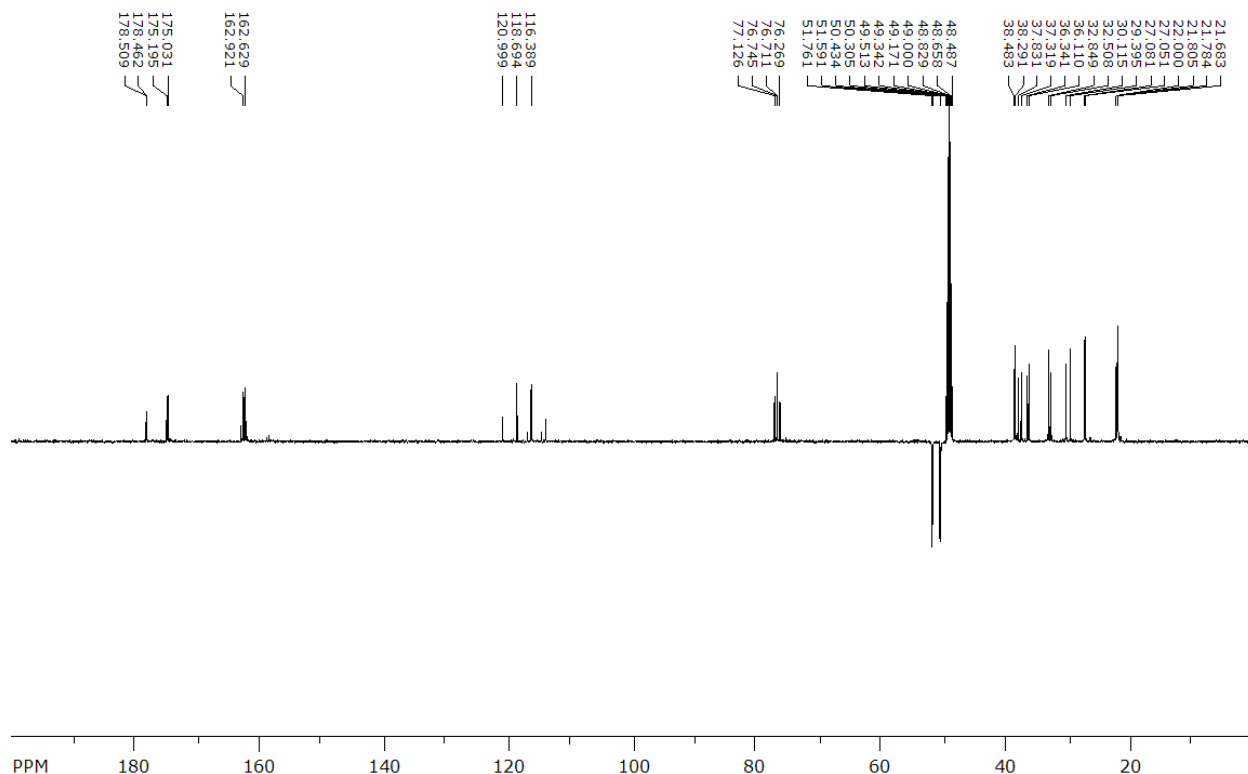

**Fig. S51.**  $^{13}\text{C}$  NMR spectrum of isomeric mixture of 1,8-Dicarboxy-6-azoniadispiro[4.1.4.2]tridecane trifluoroacetates (**23a+23b+23c-red**) in  $\text{CD}_3\text{OD}+\text{CF}_3\text{COOH}$  at 125 MHz

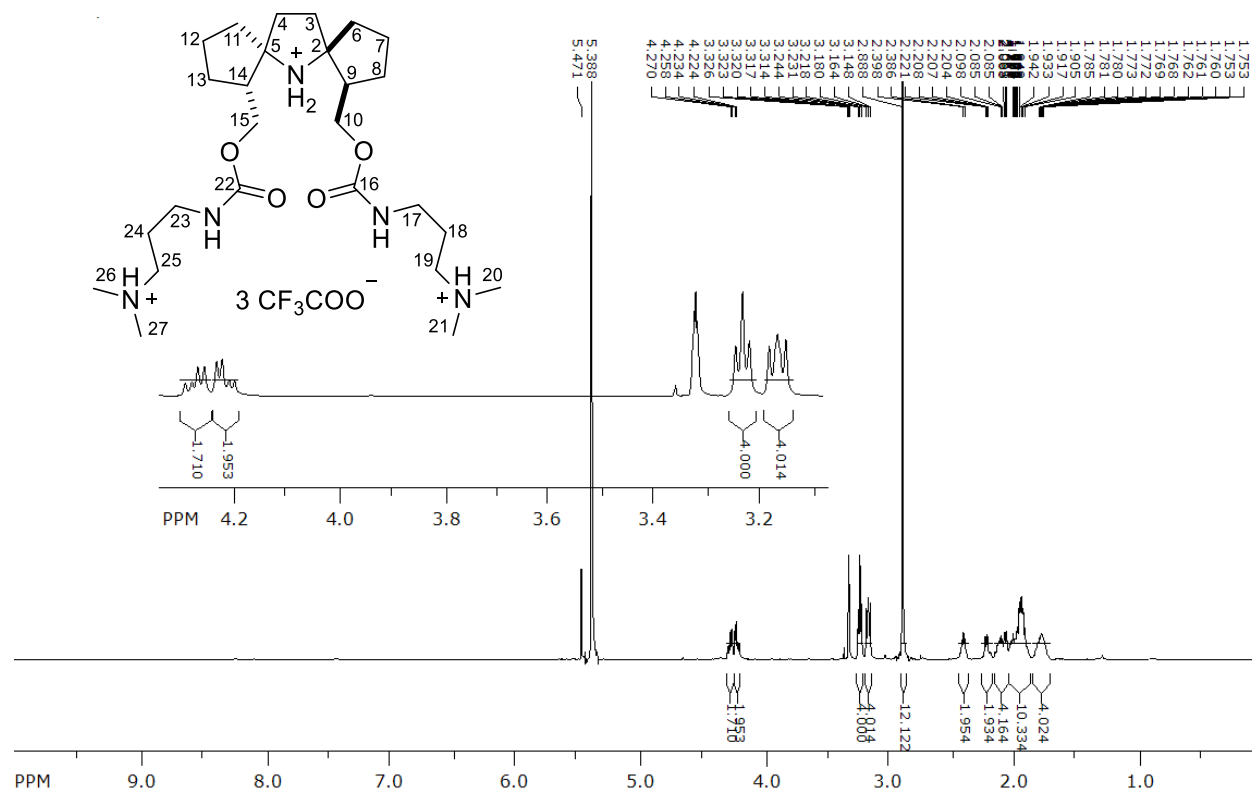

**Fig. S52.** <sup>1</sup>H NMR spectrum of (1R(S),5R(S),7R(S),8R(S))-1,8-Bis[(((3-(dimethylamino)propyl)amino)carbonyl)oxy)methyl]-6-azoniadispiro[4.1.4.2]tridecane trifluoroacetate (**27-red**) in CD<sub>3</sub>OD+CF<sub>3</sub>COOD at 500 MHz

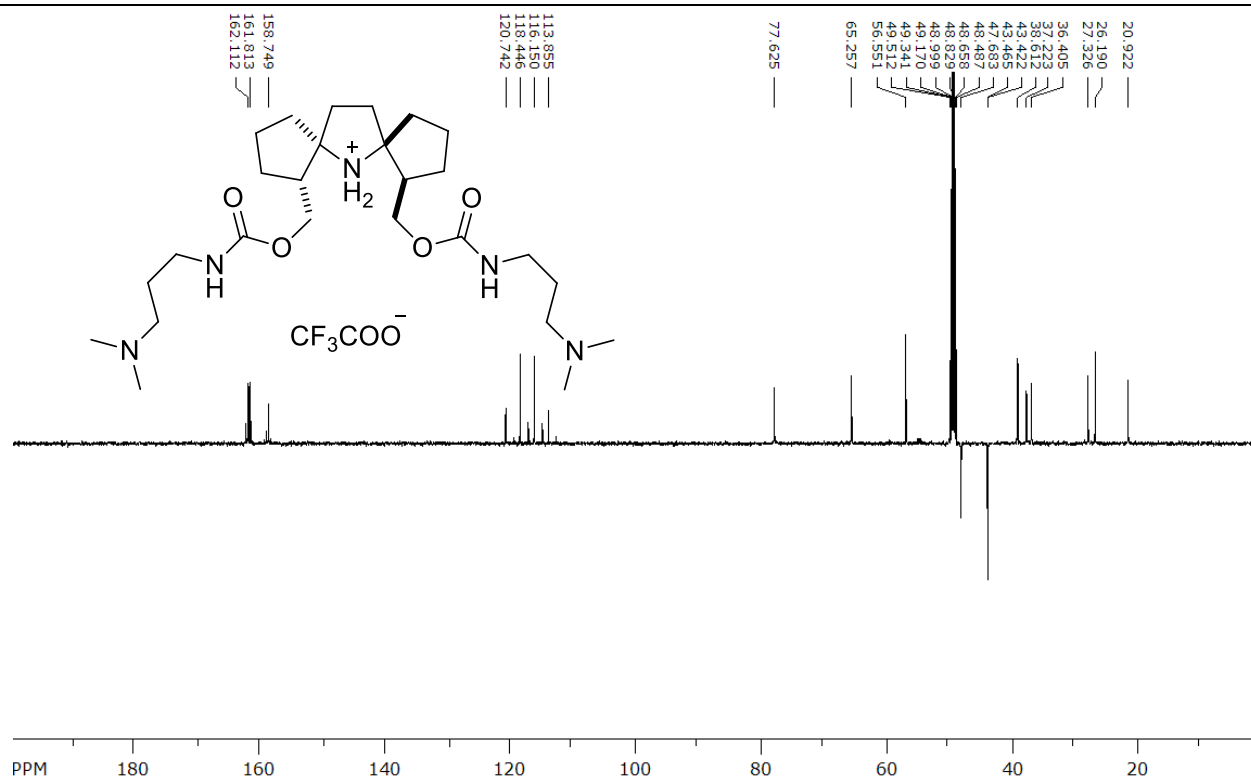

**Fig. S53.**  $^{13}\text{C}$  NMR spectrum of (1*R*(*S*),5*R*(*S*),7*R*(*S*),8*R*(*S*))-1,8-Bis[(((3-(dimethylamino)propyl)amino)carbonyl)oxy)methyl]-6-azoniadispiro[4.1.4.2]tridecane trifluoroacetate (**27-red**) in  $\text{CD}_3\text{OD}+\text{CF}_3\text{COOD}$  at 125 MHz

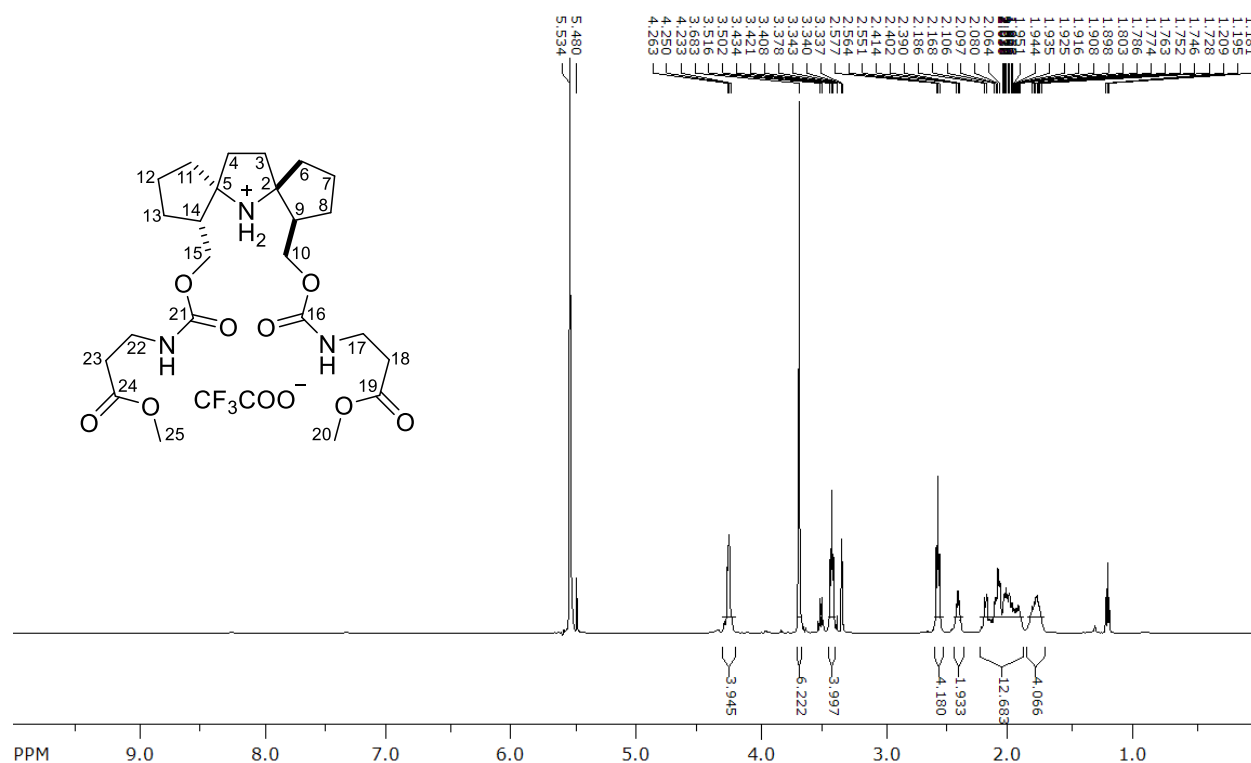

**Fig. S54.**  $^1\text{H}$  NMR spectrum of (1*R*(*S*),5*R*(*S*),7*R*(*S*),8*R*(*S*))-1,8-Bis[(((3-methoxy-3-oxopropyl)amino)carbonyl)oxy)methyl]-6-azoniadispiro[4.1.4.2]tridecane trifluoroacetate (**28-red**) in  $\text{CD}_3\text{OD}+\text{CF}_3\text{COOD}$  at 500 MHz



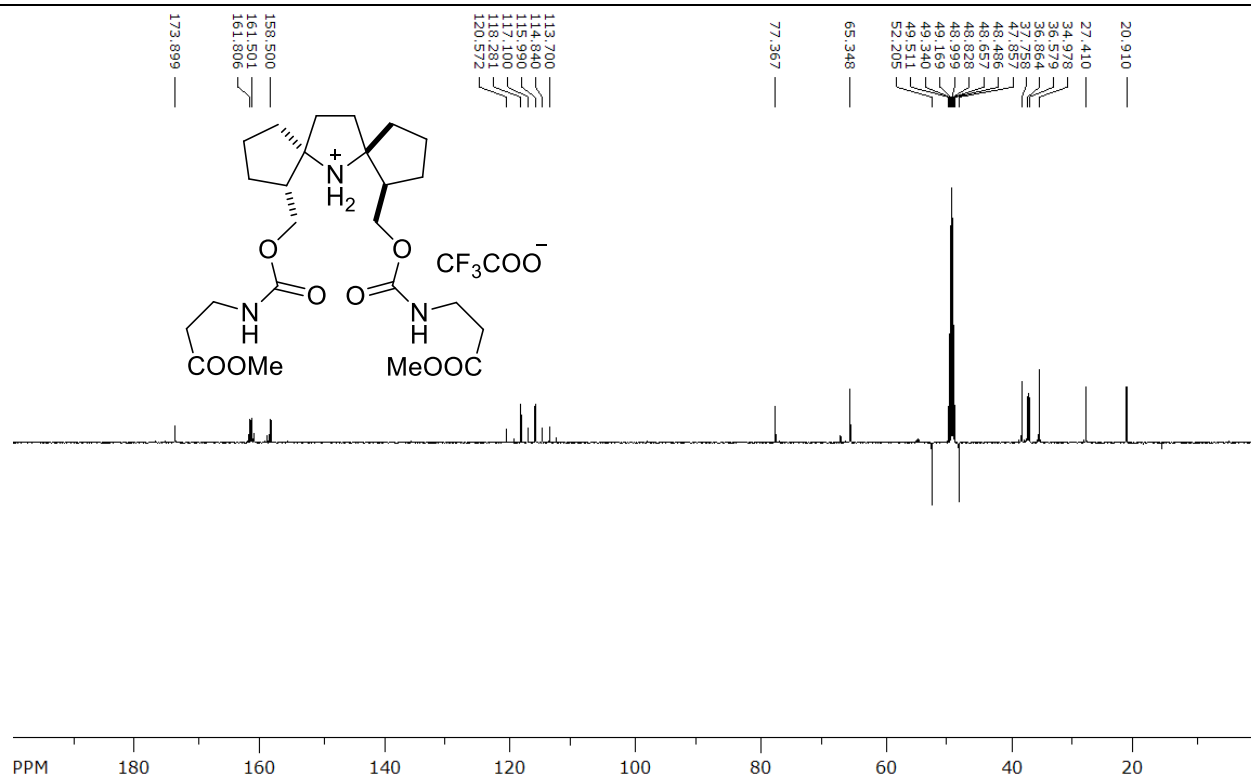

**Fig. S55.**  $^{13}\text{C}$  NMR spectrum of (1*R*(*S*),5*R*(*S*),7*R*(*S*),8*R*(*S*))-1,8-Bis[(((3-methoxy-3-oxopropyl)amino)carbonyl)oxy)methyl]-6-azoniadispiro[4.1.4.2]tridecane trifluoroacetate (**28-red**) in  $\text{CD}_3\text{OD}+\text{CF}_3\text{COOD}$  at 125 MHz

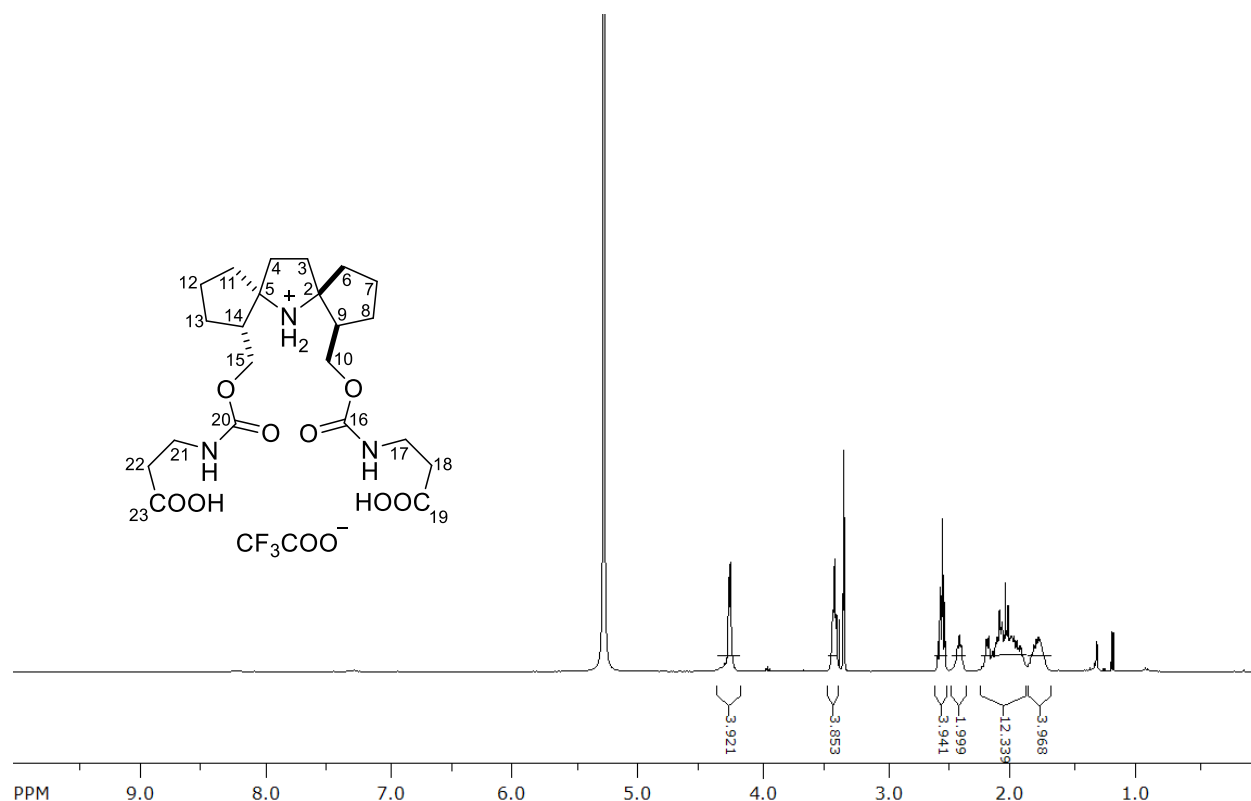

**Fig. S56.**  $^1\text{H}$  NMR spectrum of (1*R*(*S*),5*R*(*S*),7*R*(*S*),8*R*(*S*))-1,8-Bis[(((2-carboxyethyl)amino)carbonyl)oxy)methyl]-6-azoniadispiro[4.1.4.2]tridecane trifluoroacetate (**29-red**) in  $\text{CD}_3\text{OD}+\text{CF}_3\text{COOD}$  at 400 MHz



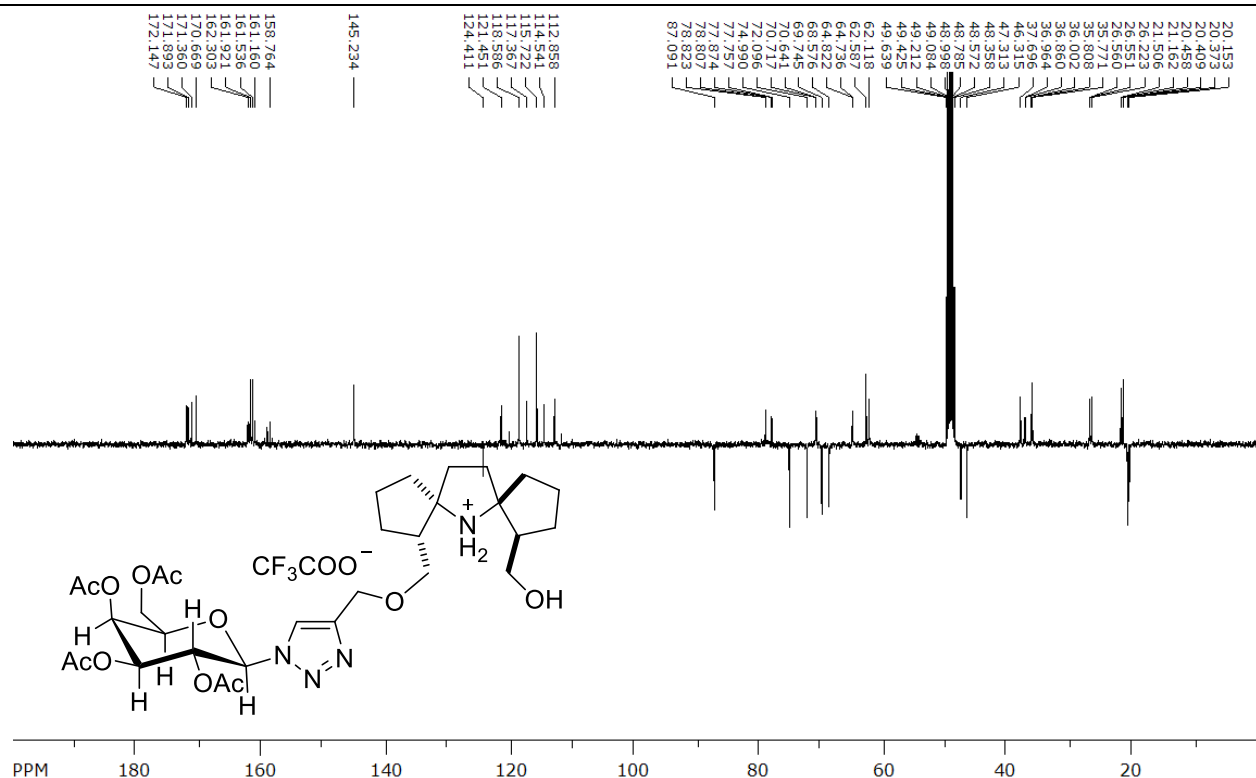

**Fig. S59.** <sup>13</sup>C NMR spectrum of (1*R*(*S*),5*R*(*S*),7*R*(*S*),8*R*(*S*))-1-(Hydroxymethyl)-8-((1-[2,3,4,6-tetra-*O*-acetyl-β-D-galactopyranosyl]-1*H*-1,2,3-triazol-4-yl)methoxy)methyl)-6-azoniadispiro[4.1.4.2]tridecane trifluoroacetate (**32-red**) in CD<sub>3</sub>OD+CF<sub>3</sub>COOD at 100 MHz

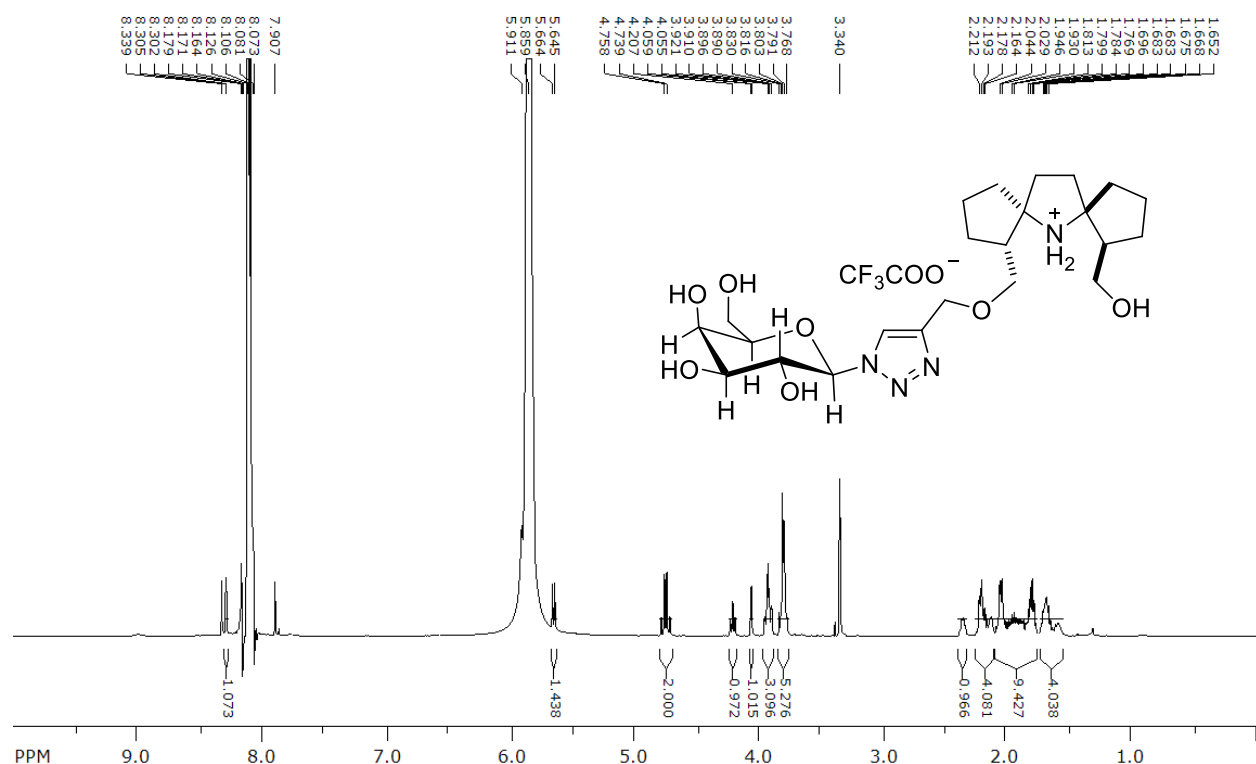

**Fig. S60.** <sup>1</sup>H NMR spectrum of (1*R*(*S*),5*R*(*S*),7*R*(*S*),8*R*(*S*))-1-(Hydroxymethyl)-8-((1-[β-D-galactopyranosyl]-1*H*-1,2,3-triazol-4-yl)methoxy)methyl)-6-azoniadispiro[4.1.4.2]tridecane trifluoroacetate (**33-red**) in CD<sub>3</sub>OD+HCOOH+HOOC-COOH at 500 MHz

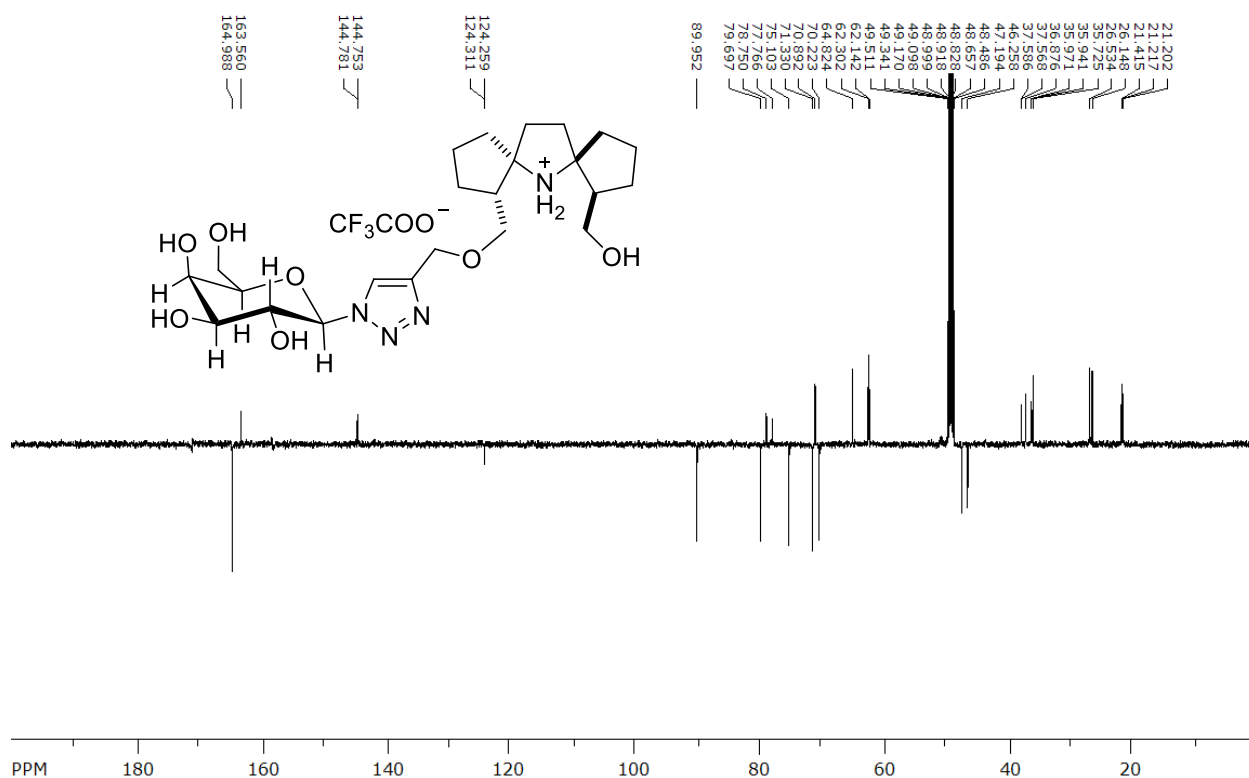

**Fig. S61.**  $^{13}\text{C}$  NMR spectrum of (1*R*(*S*),5*R*(*S*),7*R*(*S*),8*R*(*S*))-1-(Hydroxymethyl)-8-((1-[ $\beta$ -D-galactopyranosyl]-1*H*-1,2,3-triazol-4-yl)methoxy)methyl)-6-azoniadispiro[4.1.4.2]tridecane trifluoroacetate (**33-red**) in  $\text{CD}_3\text{OD}+\text{HCOOH}+\text{HOOC}\text{COOH}$  at 125 MHz

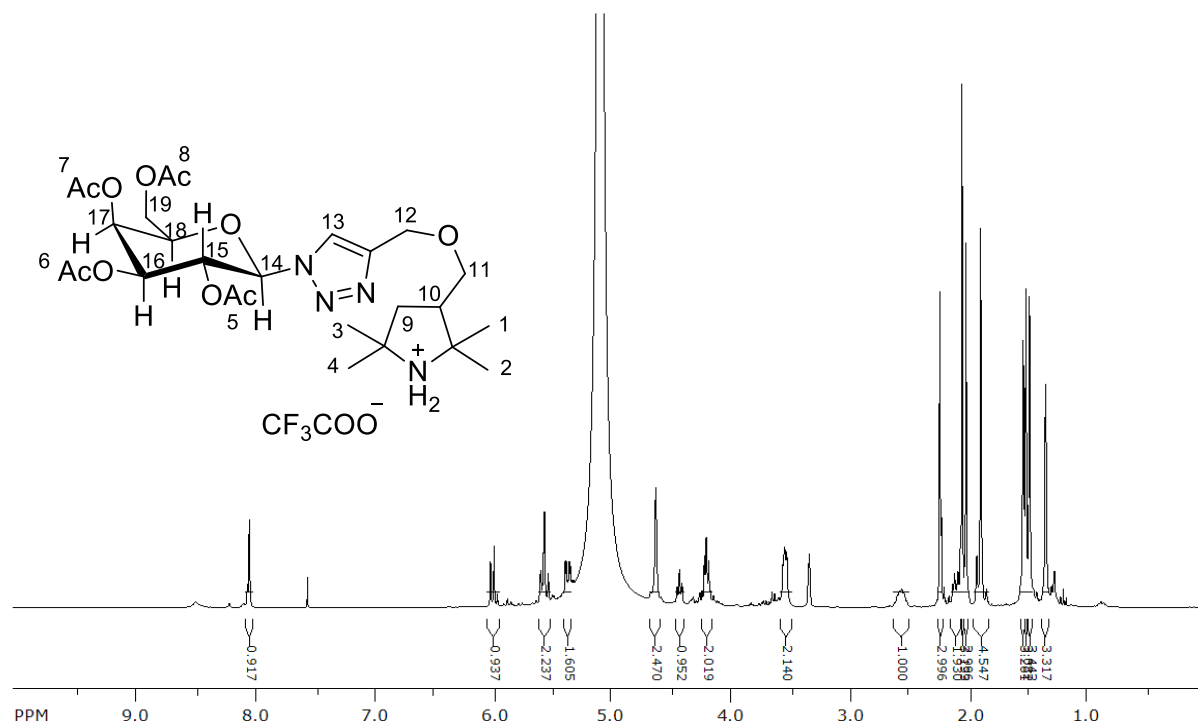

**Fig. S62.**  $^1\text{H}$  NMR spectrum of 2,2,5,5-Tetramethyl-3-(((1-(2,3,4,6-tetra-O-acetyl- $\beta$ -D-galactopyranosyl)-1*H*-1,2,3-triazol-4-yl)methoxy)methyl)pyrrolidinium trifluoroacetate (**38-red**) in  $\text{CD}_3\text{OD}+\text{CF}_3\text{COOH}$  at 300 MHz

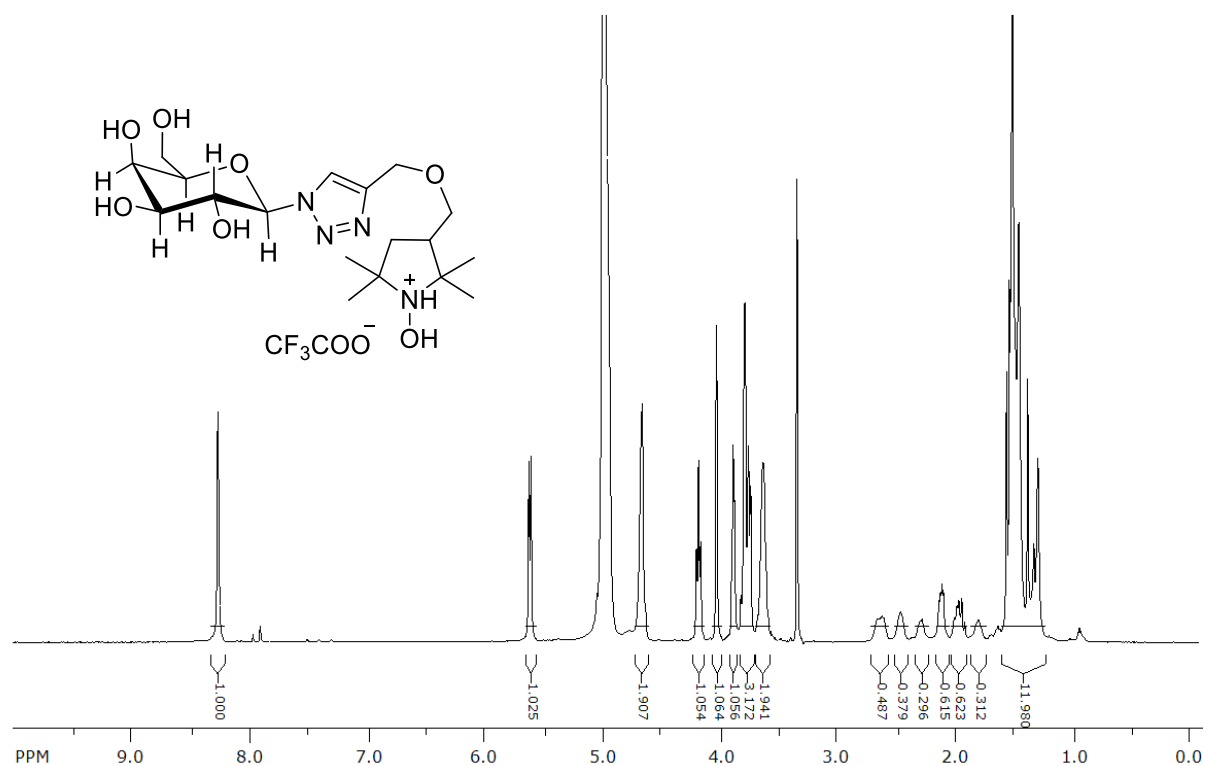

**Fig. S63.** <sup>1</sup>H NMR spectrum of 1-Hydroxy-2,2,5,5-tetramethyl-3-(((1-(β-D-galactopyranosyl)-1H-1,2,3-triazol-4-yl)methoxy)methyl)pyrrolidinium trifluoroacetate (**35-red**) in CD<sub>3</sub>OD+CF<sub>3</sub>COOH at 500 MHz

## 5. 2D NMR spectral data

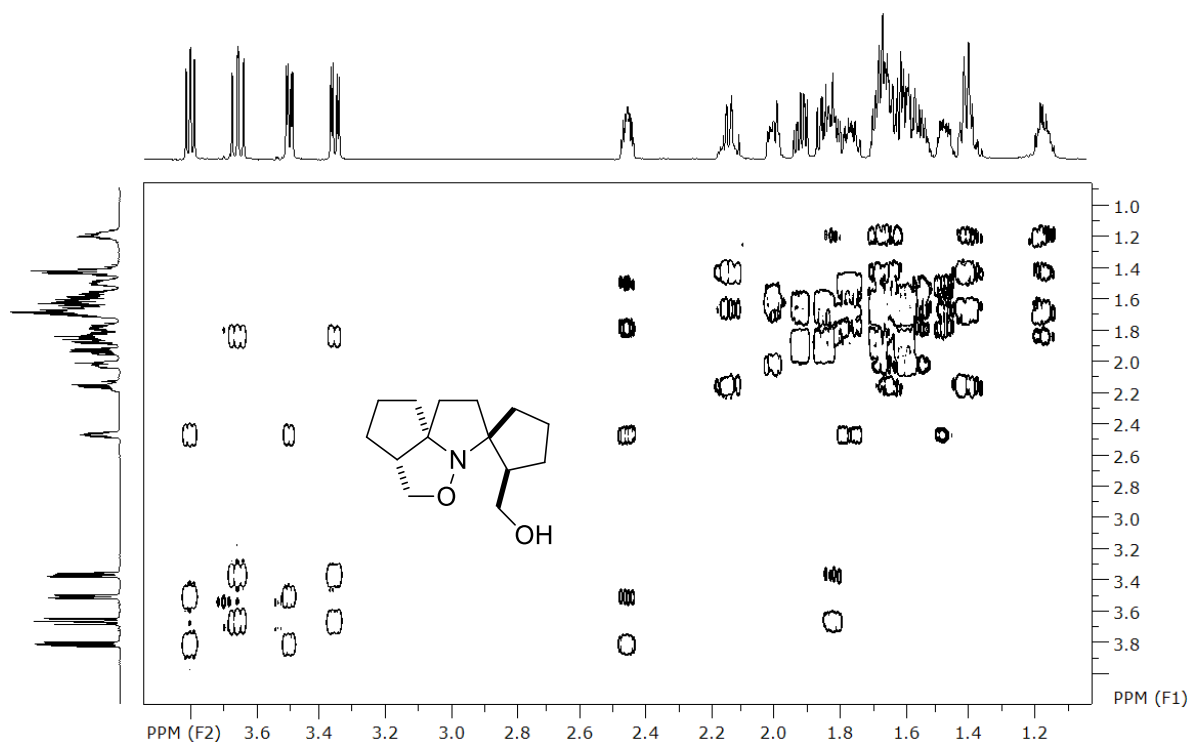

**Fig. S64.**  $^1\text{H}$ - $^1\text{H}$  COSY NMR spectrum of (1*R*(*S*),2*R*(*S*),6*a'*(*R*),9*a'*(*S*)-Hexahydro-6'*H*-spiro[cyclopentan-1,3'-cyclopenta[*c*]pyrrolo[1,2-*b*]isoxazol]-2-ylmethanol (**13**) in  $\text{CDCl}_3$ .

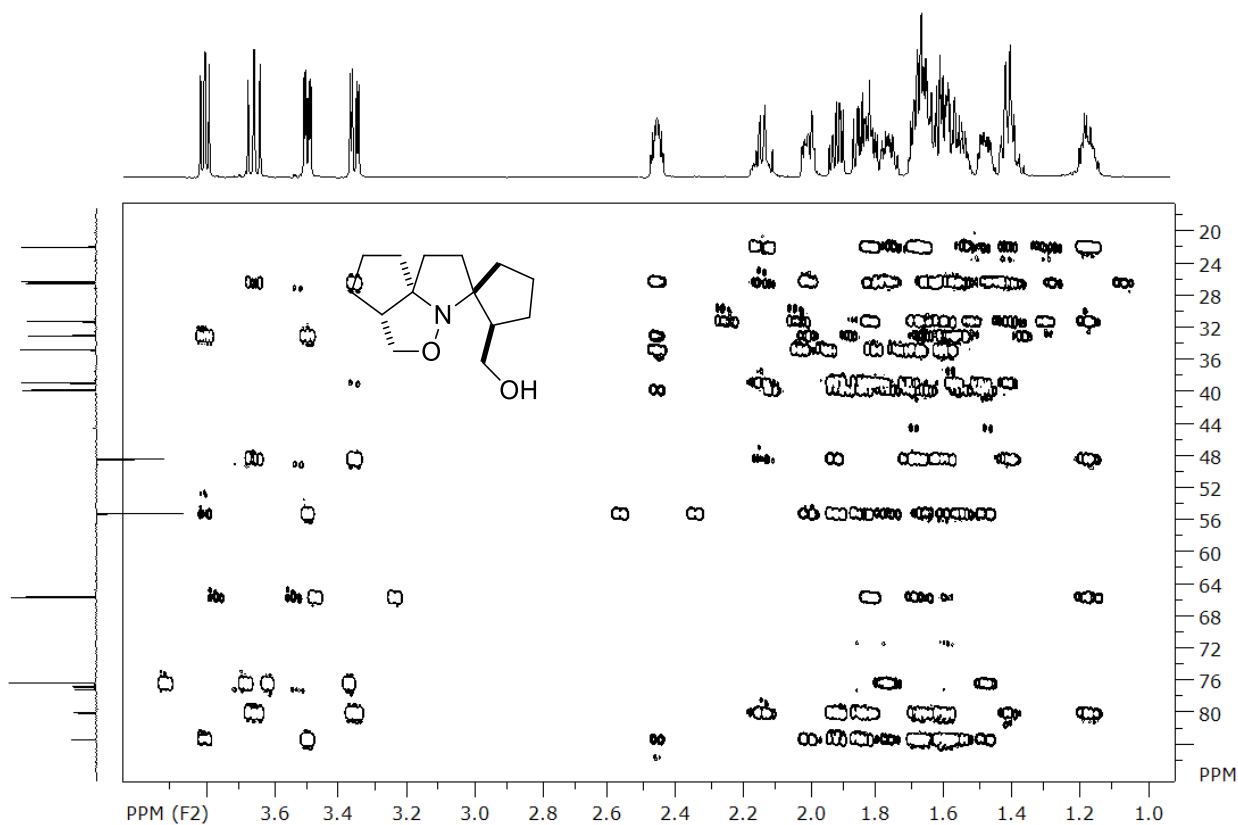

**Fig. S65.**  $^1\text{H}$ - $^{13}\text{C}$  HMBC NMR spectrum of (1*R*(*S*),2*R*(*S*),6*a'*(*R*),9*a'*(*S*)-Hexahydro-6'*H*-spiro[cyclopentan-1,3'-cyclopenta[*c*]pyrrolo[1,2-*b*]isoxazol]-2-ylmethanol (**13**) in  $\text{CDCl}_3$ .

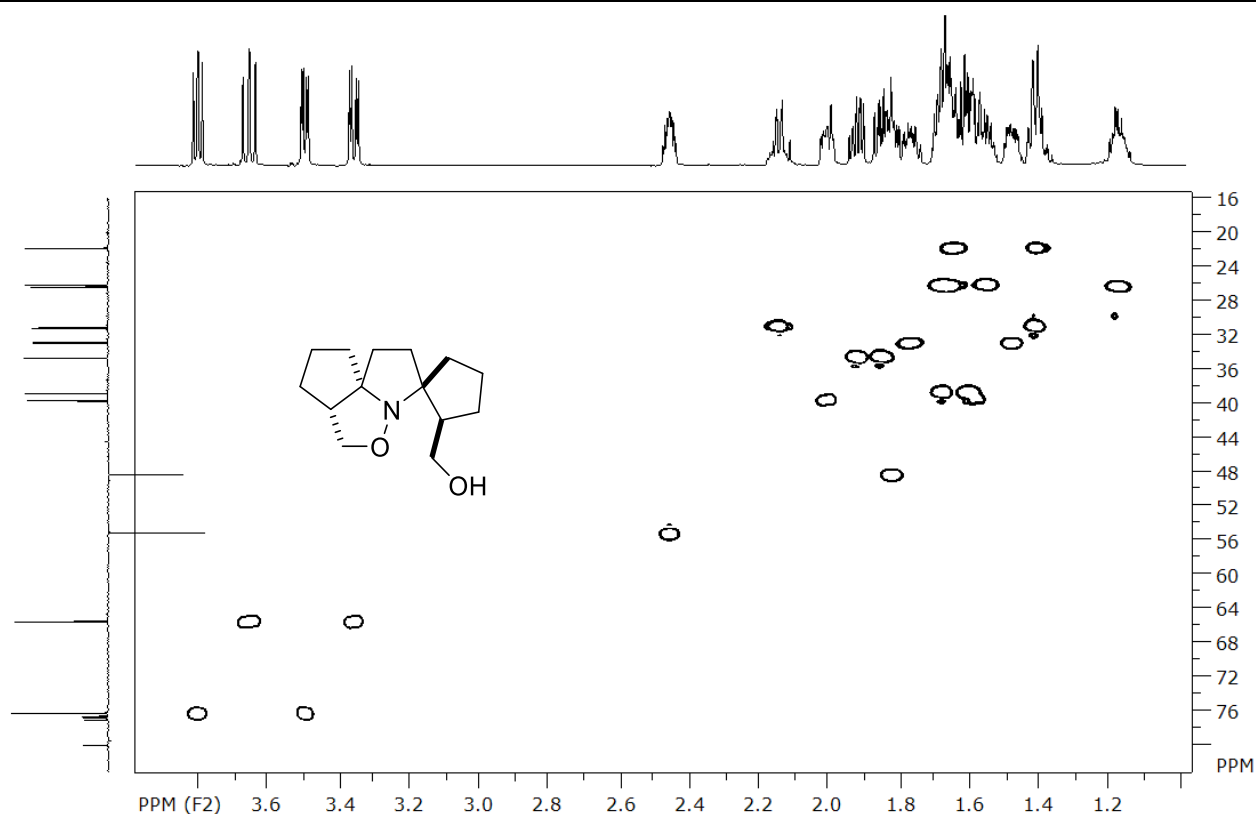

**Fig. S66.**  $^1\text{H}$ - $^{13}\text{C}$  HSQC NMR spectrum of (1*R*(*S*),2*R*(*S*),6*a'**R*(*S*),9*a'**R*(*S*)-Hexahydro-6'*H*-spiro[cyclopentan-1,3'-cyclopenta[*c*]pyrrolo[1,2-*b*]isoxazol]-2-ylmethanol (**13**) in  $\text{CDCl}_3$ .

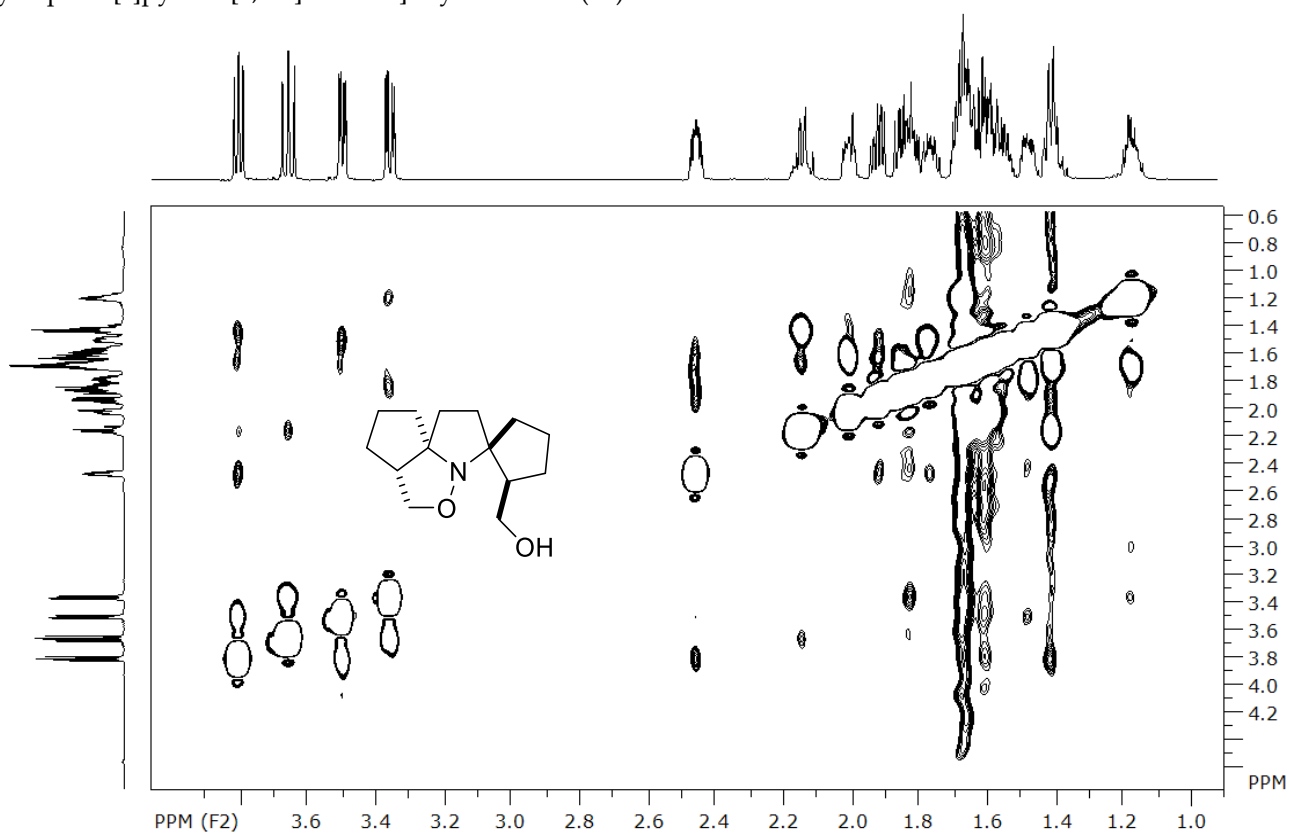

**Fig. S67.**  $^1\text{H}$ - $^1\text{H}$  NOESY NMR spectrum of (1*R*(*S*),2*R*(*S*),6*a'**R*(*S*),9*a'**R*(*S*)-Hexahydro-6'*H*-spiro[cyclopentan-1,3'-cyclopenta[*c*]pyrrolo[1,2-*b*]isoxazol]-2-ylmethanol (**13**) in  $\text{CDCl}_3$ .

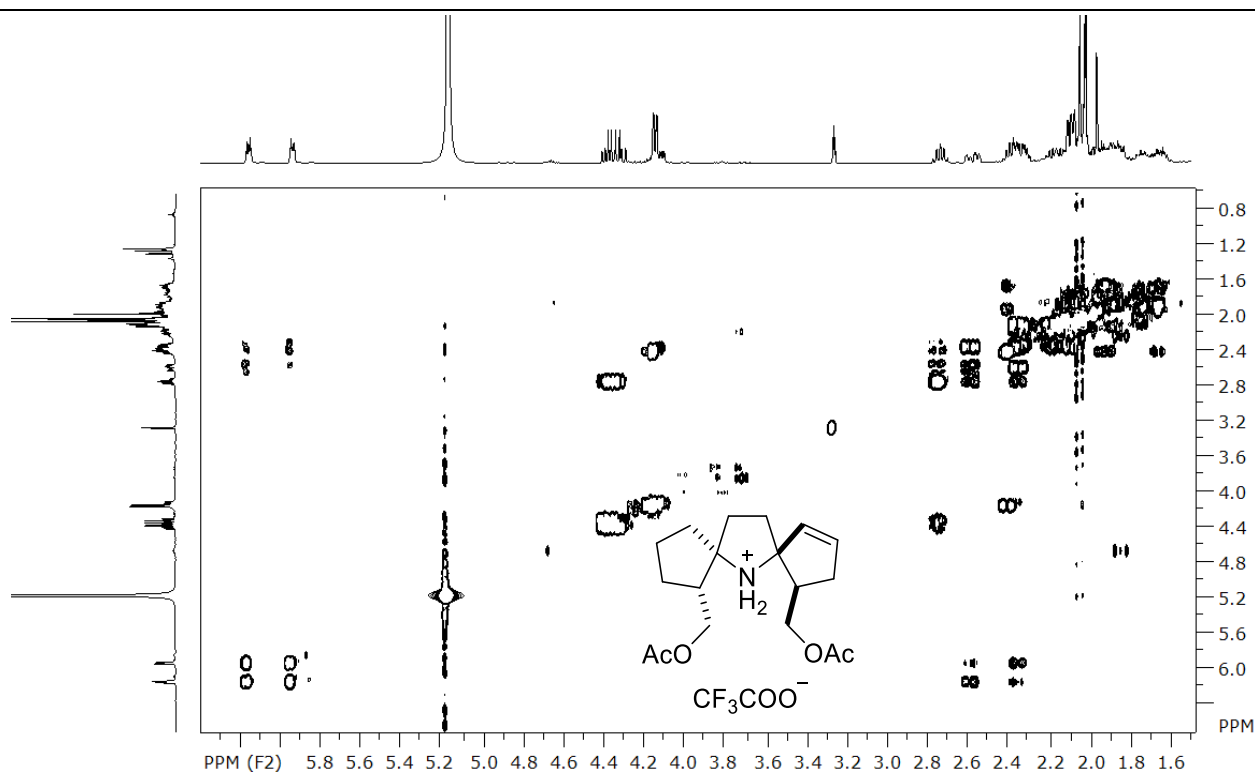

**Fig. S68.**  $^1\text{H}$ - $^1\text{H}$  COSY NMR spectrum of (4*R*(*S*),5*S*(*R*),7*R*(*S*),8*R*(*S*))-4,8-Bis[(acetyloxy)methyl]-6-azoniadispiro[4.1.4.2]tridec-1-ene trifluoroacetate (**19**) in  $\text{CD}_3\text{OD}+\text{CF}_3\text{COOH}$ .

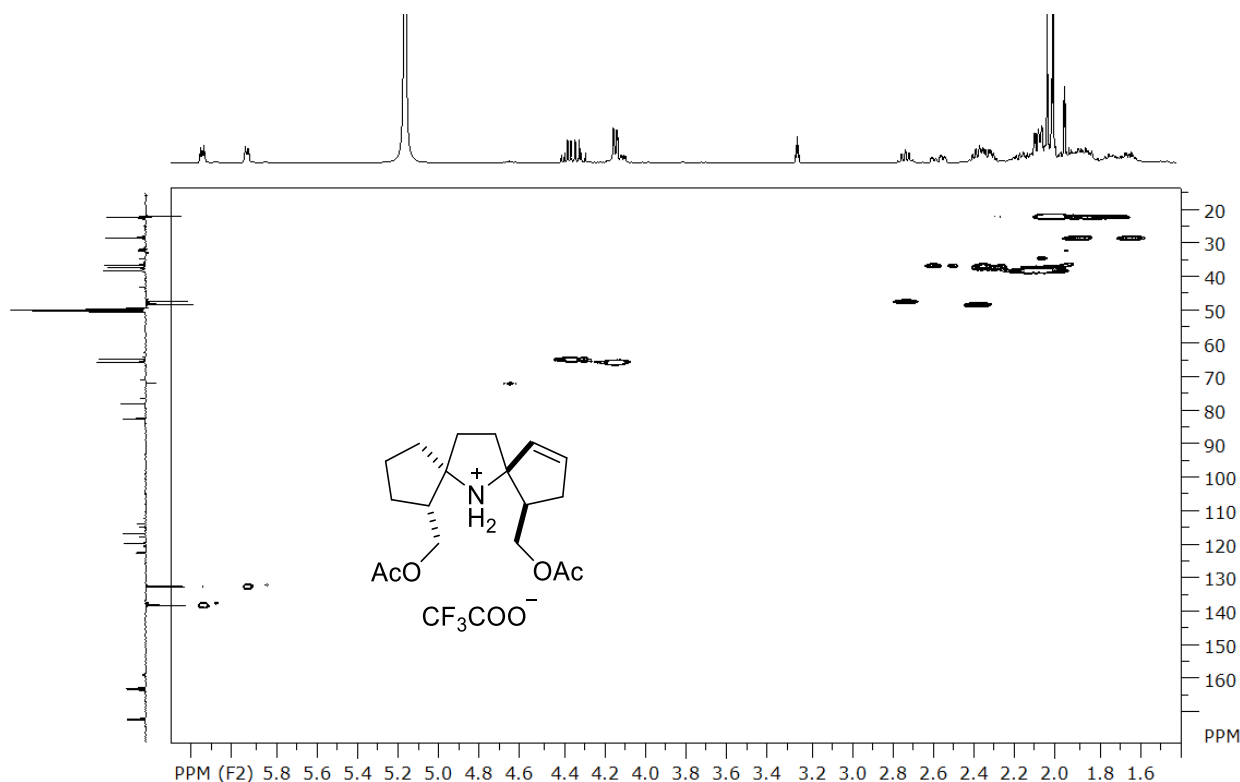

**Fig. S69.**  $^1\text{H}$ - $^{13}\text{C}$  HSQC NMR spectrum of (4*R*(*S*),5*S*(*R*),7*R*(*S*),8*R*(*S*))-4,8-Bis[(acetyloxy)methyl]-6-azoniadispiro[4.1.4.2]tridec-1-ene trifluoroacetate (**19**) in  $\text{CD}_3\text{OD}+\text{CF}_3\text{COOH}$ .



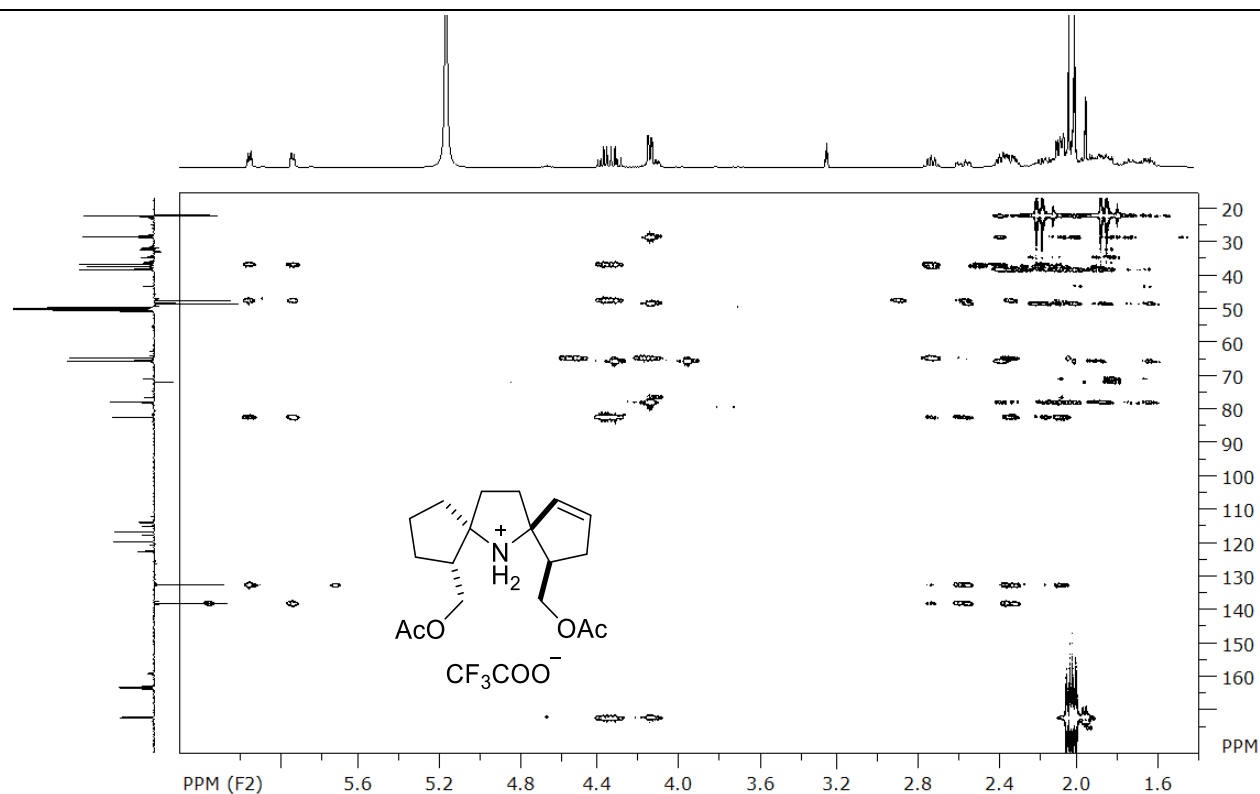

**Fig. S70.**  $^1\text{H}$ - $^{13}\text{C}$  HMBC NMR spectrum of (4*R*(*S*),5*S*(*R*),7*R*(*S*),8*R*(*S*))-4,8-Bis[(acetyloxy)methyl]-6-azoniadispiro[4.1.4.2]tridec-1-ene trifluoroacetate (**19**) in  $\text{CD}_3\text{OD}+\text{CF}_3\text{COOH}$ .

## 6. EPR measurements.

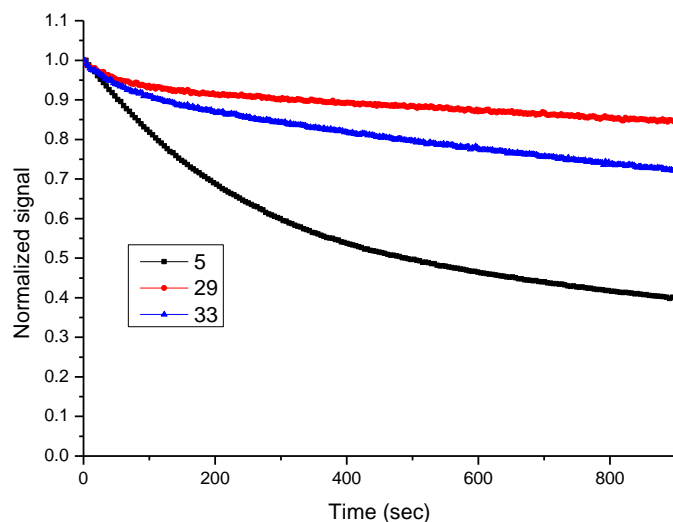

**Fig. S71.** The kinetics of decrease of EPR signal of nitroxides **5**, **29** and **33** in solution of ascorbic acid (100mM) and glutathione (5mM). These curves were fitted with exponential decay function to calculate the first order reaction rate constants, which were later used for calculation second order reaction rate constants.

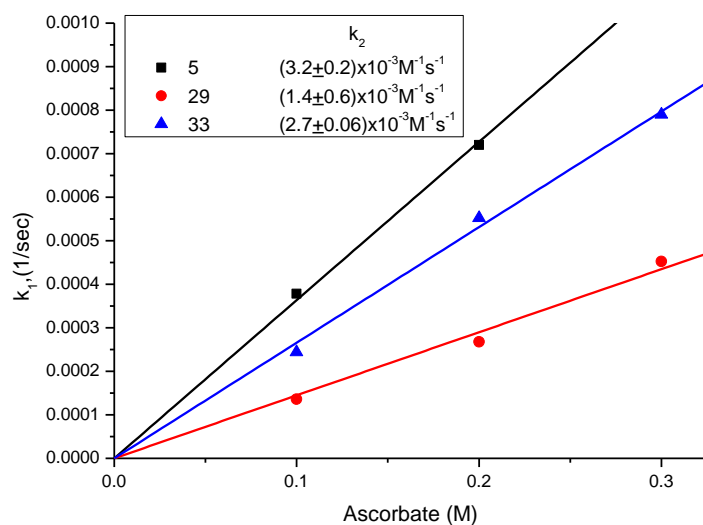

**Fig. S72.** The dependence of first order reaction rate constants versus ascorbic acid concentration of the radicals **5**, **29** and **33**. Data were fitted with linear dependence starting from zero value. The calculated slopes correspond to second order reaction rate constants.

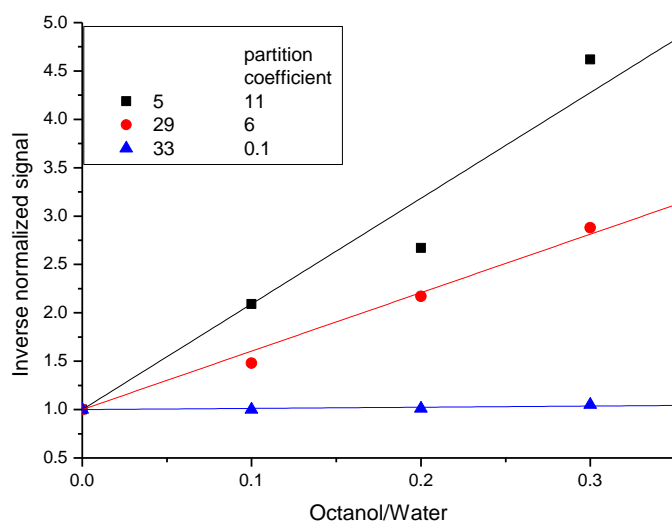

**Fig. S73.** Data for calculation of partition coefficients of the radicals **5**, **29** and **33**. The inverse value of the relative decrease of EPR signal (inverse normalized value) of the radical in the water were plotted versus octanol/water ratio. Data were fitted with linear dependence starting from one unit value. The absolute value of this slope corresponds to partition coefficient.

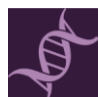

**Table S1.** Experimental details of X-ray diffraction experiments for compounds investigated.

|                                                                                                                | 5                                                         | 9                                                        | 14                                                          | 17                                                         |
|----------------------------------------------------------------------------------------------------------------|-----------------------------------------------------------|----------------------------------------------------------|-------------------------------------------------------------|------------------------------------------------------------|
| Crystal data                                                                                                   |                                                           |                                                          |                                                             |                                                            |
| Chemical formula                                                                                               | C <sub>14</sub> H <sub>24</sub> NO <sub>3</sub>           | C <sub>9</sub> H <sub>15</sub> NO <sub>2</sub>           | C <sub>14</sub> H <sub>25</sub> NO <sub>2</sub>             | C <sub>18</sub> H <sub>28</sub> NO <sub>5</sub>            |
| M <sub>r</sub>                                                                                                 | 254.34                                                    | 169.22                                                   | 239.35                                                      | 338.41                                                     |
| Crystal system,<br>space group                                                                                 | Triclinic,<br><i>P</i> 1                                  | Monoclinic, <i>P</i> 2 <sub>1</sub> / <i>c</i>           | Monoclinic,<br><i>C</i> 2/ <i>c</i>                         | Tetragonal, <i>P</i> 4 <sub>3</sub> 2 <sub>1</sub> 2       |
| Temperature (K)                                                                                                | 299                                                       | 296                                                      | 296                                                         | 296                                                        |
| <i>a</i> , <i>b</i> , <i>c</i> (Å)                                                                             | 6.5386(6),<br>18.1055(17),<br>19.912(2)                   | 5.913(5), 11.952(11),<br>12.654(12)                      | 25.596(3), 8.3639(7),<br>25.239(2)                          | 6.9123(3), 6.9123(3),<br>37.383(2)                         |
| $\alpha$ , $\beta$ , $\gamma$ (°)                                                                              | 114.383(4),<br>91.155(4), 96.370(4)                       | 90, 103.27(2), 90                                        | 90, 90.021(6), 90                                           | 90, 90, 90                                                 |
| <i>V</i> (Å <sup>3</sup> )                                                                                     | 2128.1(4)                                                 | 870.4(13)                                                | 5403.2(9)                                                   | 1786.2(2)                                                  |
| <i>Z</i>                                                                                                       | 6                                                         | 4                                                        | 16                                                          | 4                                                          |
| <i>F</i> (000)                                                                                                 | 834                                                       | 368                                                      | 2112                                                        | 732                                                        |
| $\mu$ (mm <sup>-1</sup> )                                                                                      | 0.08                                                      | 0.09                                                     | 0.08                                                        | 0.09                                                       |
| Crystal size (mm)                                                                                              | 1.00 × 0.42 × 0.20                                        | 1.00 × 0.38 × 0.25                                       | 1.00 × 0.80 × 0.15                                          | 1.00 × 0.79 × 0.60                                         |
| Data collection                                                                                                |                                                           |                                                          |                                                             |                                                            |
| <i>T</i> <sub>min</sub> , <i>T</i> <sub>max</sub>                                                              | 0.799, 0.862                                              | 0.742, 0.875                                             | 0.763, 0.862                                                | 0.798, 0.863                                               |
| No. of measured,<br>independent and<br>observed [ <i>I</i> > 2σ( <i>I</i> )]<br>reflections                    | 52841, 7588, 5736                                         | 6851, 1977, 1609                                         | 32116, 4879, 2916                                           | 30703, 3320, 3035                                          |
| <i>R</i> <sub>int</sub>                                                                                        | 0.052                                                     | 0.055                                                    | 0.043                                                       | 0.037                                                      |
| $\theta$ values (°)                                                                                            | $\theta_{\max}$ = 25.1, $\theta_{\min}$ =<br>1.1          | $\theta_{\max}$ = 27.5, $\theta_{\min}$ = 2.4            | $\theta_{\max}$ = 25.3, $\theta_{\min}$ =<br>2.3            | $\theta_{\max}$ = 35.0, $\theta_{\min}$ = 3.0              |
| Range of <i>h</i> , <i>k</i> , <i>l</i>                                                                        | <i>h</i> = -7→7, <i>k</i> = -<br>21→21, <i>l</i> = -23→23 | <i>h</i> = -7→5, <i>k</i> = -14→15,<br><i>l</i> = -16→16 | <i>h</i> = -30→30, <i>k</i> = -<br>10→10, <i>l</i> = -30→30 | <i>h</i> = -10→9, <i>k</i> = -<br>11→11, <i>l</i> = -56→48 |
| Refinement                                                                                                     |                                                           |                                                          |                                                             |                                                            |
| <i>R</i> [ <i>F</i> <sup>2</sup> > 2σ( <i>F</i> <sup>2</sup> )], <i>wR</i> ( <i>F</i> <sup>2</sup> ), <i>S</i> | 0.076, 0.241, 1.06                                        | 0.056, 0.184, 1.06                                       | 0.093, 0.294, 1.04                                          | 0.060, 0.164, 1.21                                         |
| No. of reflections                                                                                             | 7588                                                      | 1977                                                     | 4879                                                        | 3320                                                       |
| No. of parameters                                                                                              | 493                                                       | 110                                                      | 322                                                         | 111                                                        |
| No. of restraints                                                                                              | 12                                                        | 0                                                        | 3                                                           | 0                                                          |
| $\Delta\rho_{\max}$ , $\Delta\rho_{\min}$ (e Å <sup>-3</sup> )                                                 | 0.45, -0.48                                               | 0.46, -0.34                                              | 0.47, -0.32                                                 | 0.30, -0.20                                                |
| Absolute structure<br>parameter                                                                                | —                                                         | —                                                        | —                                                           | 0.52 (16)                                                  |



|                                                                                                                | 20                                                          | 22                                                        | 23a                                                         | 26                                                              |
|----------------------------------------------------------------------------------------------------------------|-------------------------------------------------------------|-----------------------------------------------------------|-------------------------------------------------------------|-----------------------------------------------------------------|
| Crystal data                                                                                                   |                                                             |                                                           |                                                             |                                                                 |
| Chemical formula                                                                                               | C <sub>14</sub> H <sub>21</sub> NO <sub>4</sub>             | C <sub>16</sub> H <sub>24</sub> NO <sub>5</sub>           | C <sub>14</sub> H <sub>20</sub> NO <sub>5</sub>             | C <sub>22</sub> H <sub>28</sub> N <sub>5</sub> O <sub>5</sub>   |
| M <sub>r</sub>                                                                                                 | 267.32                                                      | 310.36                                                    | 282.31                                                      | 442.49                                                          |
| Crystal system,<br>space group                                                                                 | Triclinic,<br><i>P</i> 1                                    | Orthorhombic, <i>P</i> 2 <sub>1</sub> 2 <sub>1</sub> 2    | Monoclinic, <i>P</i> 2 <sub>1</sub> / <i>n</i>              | Monoclinic,<br><i>C</i> 2/ <i>c</i>                             |
| Temperature (K)                                                                                                | 296                                                         | 296                                                       | 296                                                         | 299                                                             |
| <i>a</i> , <i>b</i> , <i>c</i> (Å)                                                                             | 8.4272(7), 8.9015(7),<br>9.3829(8)                          | 10.9663(7), 11.8601(7),<br>6.3522(4)                      | 9.4026(5),<br>11.9073(5),<br>12.6526(6)                     | 12.6524(14),<br>10.5198(11),<br>16.8648(17)                     |
| α, β, γ (°)                                                                                                    | 83.367(3), 83.990(4),<br>66.215(3)                          | 90, 90, 90                                                | 90, 98.191(2), 90                                           | 90, 103.860(4), 90                                              |
| <i>V</i> (Å <sup>3</sup> )                                                                                     | 638.45(9)                                                   | 826.18(9)                                                 | 1402.13(12)                                                 | 2179.4(4)                                                       |
| <i>Z</i>                                                                                                       | 2                                                           | 2                                                         | 4                                                           | 4                                                               |
| <i>F</i> (000)                                                                                                 | 288                                                         | 334                                                       | 604                                                         | 940                                                             |
| μ (mm <sup>-1</sup> )                                                                                          | 0.10                                                        | 0.09                                                      | 0.10                                                        | 0.10                                                            |
| Crystal size (mm)                                                                                              | 0.48 × 0.12 × 0.09                                          | 0.54 × 0.20 × 0.10                                        | 0.63 × 0.50 × 0.44                                          | 0.60 × 0.19 × 0.16                                              |
| Data collection                                                                                                |                                                             |                                                           |                                                             |                                                                 |
| <i>T</i> <sub>min</sub> , <i>T</i> <sub>max</sub>                                                              | 0.816, 0.862                                                | 0.882, 0.958                                              | 0.869, 0.914                                                | 0.926, 0.958                                                    |
| No. of measured,<br>independent and<br>observed [ <i>I</i> > 2σ( <i>I</i> )]<br>reflections                    | 15091, 2265, 1802                                           | 6026, 1455, 1303                                          | 22682, 3231, 2477                                           | 14914, 2385, 2035                                               |
| <i>R</i> <sub>int</sub>                                                                                        | 0.041                                                       | 0.058                                                     | 0.037                                                       | 0.040                                                           |
| θ values (°)                                                                                                   | θ <sub>max</sub> = 25.2, θ <sub>min</sub> = 2.2             | θ <sub>max</sub> = 25.0, θ <sub>min</sub> = 3.6           | θ <sub>max</sub> = 27.5, θ <sub>min</sub> =<br>2.4          | θ <sub>max</sub> = 27.0, θ <sub>min</sub> =<br>2.5              |
| Range of <i>h</i> , <i>k</i> , <i>l</i>                                                                        | <i>h</i> = -10→10, <i>k</i> = -<br>10→10, <i>l</i> = -11→11 | <i>h</i> = -12→13, <i>k</i> = -<br>11→14, <i>l</i> = -7→7 | <i>h</i> = -12→12, <i>k</i> = -<br>15→15, <i>l</i> = -16→15 | <i>h</i> = -15→16, <i>k</i> = -<br>13→13, <i>l</i> = -<br>21→15 |
| Refinement                                                                                                     |                                                             |                                                           |                                                             |                                                                 |
| <i>R</i> [ <i>F</i> <sup>2</sup> > 2σ( <i>F</i> <sup>2</sup> )], <i>wR</i> ( <i>F</i> <sup>2</sup> ), <i>S</i> | 0.075, 0.198, 1.04                                          | 0.082, 0.250, 1.02                                        | 0.060, 0.192, 1.01                                          | 0.041, 0.119, 1.07                                              |
| No. of reflections                                                                                             | 2265                                                        | 1455                                                      | 3231                                                        | 2385                                                            |
| No. of parameters                                                                                              | 174                                                         | 139                                                       | 209                                                         | 165                                                             |
| No. of restraints                                                                                              | 0                                                           | 47                                                        | 9                                                           | 0                                                               |
| Δρ <sub>max</sub> , Δρ <sub>min</sub> (e Å <sup>-3</sup> )                                                     | 0.37, -0.29                                                 | 0.54, -0.32                                               | 0.50, -0.41                                                 | 0.22, -0.14                                                     |
| Absolute structure<br>parameter                                                                                | –                                                           | -0.4 (8)                                                  | –                                                           | –                                                               |
